# Supplementary material for: Integrative network fusion-based multi-omics study for biomarker identification and patient classification of rheumatoid arthritis
Source: PubMed Central journal article supplement (PMC10158004; doi:10.1186/s13020-023-00750-8), 2023-05-04
Supplement: 13020_2023_750_MOESM1_ESM.pdf [file 13020_2023_750_MOESM1_ESM.pdf]

**Table S1. Clinical data and patient characteristics**

| Names          | Syndromes      | Hospital                            | Age (years) | Gender | RF (IU/mL) | ESR (mm/h) | CRP (mg/L) | DAS-28 ESR | DAS-28 CRP |
|----------------|----------------|-------------------------------------|-------------|--------|------------|------------|------------|------------|------------|
| Zhang Wencai   | Normal Control | Wang Jing Hospital of CACMS         | 66          | Male   | /          | /          | 50.93      | /          | /          |
| Wan Yongcheng  | Normal Control | Wang Jing Hospital of CACMS         | 73          | Male   | /          | /          | 6.67       | /          | /          |
| Zhang Decheng  | Normal Control | Wang Jing Hospital of CACMS         | 75          | Male   | /          | /          | 29.05      | /          | /          |
| Cao Yanzhou    | Normal Control | Wang Jing Hospital of CACMS         | N/A         | N/A    | /          | /          | /          | /          | /          |
| Liu Zhi        | Normal Control | Wang Jing Hospital of CACMS         | 71          | Male   | /          | /          | 7.73       | /          | /          |
| Wang Xueli     | Normal Control | Wang Jing Hospital of CACMS         | 56          | Female | /          | /          | /          | /          | /          |
| Changguan Shan | Normal Control | Wang Jing Hospital of CACMS         | N/A         | N/A    | /          | /          | 11.29      | /          | /          |
| Sun Shufang    | Normal Control | Wang Jing Hospital of CACMS         | 63          | Female | /          | /          | /          | /          | /          |
| Shan Linqin    | Cold-RA        | Xi'an Red Cross Hospital            | 53          | Female | 100.4      | 85         | 25.36      | /          | /          |
| Zhang Xiuping  | Normal Control | Wang Jing Hospital of CACMS         | N/A         | N/A    | /          | /          | /          | /          | /          |
| Yang Weikang   | Normal Control | Sports Medicine Hospital (Beijing)  | 19          | Male   | /          | /          | /          | /          | /          |
| Mu Xin         | Normal Control | Sports Medicine Hospital (Beijing)  | 19          | Male   | /          | /          | /          | /          | /          |
| Chen Fangjun   | Normal Control | Sports Medicine Hospital (Beijing)  | 45          | Male   | /          | 9          | /          | /          | /          |
| Niu Ruijuan    | Normal Control | Sports Medicine Hospital (Beijing)  | 35          | Female | /          | 3          | /          | /          | /          |
| Hu Tianhao     | Normal Control | Sports Medicine Hospital (Beijing)  | 17          | Male   | /          | 7          | 0          | /          | /          |
| Liu Jingyu     | Normal Control | Sports Medicine Hospital (Beijing)  | 17          | Male   | /          | /          | /          | /          | /          |
| Li Mengya      | Normal Control | Sports Medicine Hospital (Beijing)  | 16          | Female | /          | 7          | /          | /          | /          |
| Gong Manfang   | Cold-RA        | Xi'an Red Cross Hospital            | 60          | Female | 135.1      | 98         | 32.48      | /          | /          |
| Yu Hongxia     | Cold-RA        | Wang Jing Hospital of CACMS         | 60          | Female | /          | 68         | 11.5       | /          | /          |
| Li Shurong     | Cold-RA        | Wang Jing Hospital of CACMS         | 63          | Female | /          | 12         | 0.26       | /          | /          |
| Jin Heying     | Cold-RA        | Peking University Shougang Hospital | 77          | Female | /          | 97         | 24.67      | /          | /          |
| Wei Yanping    | Cold-RA        | Baotou Mongolian TCM Hospital       | 49          | Female | 85.8       | 60         | /          | /          | /          |
| Jin Denglong   | Normal Control | Sports Medicine Hospital (Beijing)  | 48          | Male   | /          | /          | 1          | /          | /          |
| Pu Yulan       | Normal Control | Wang Jing Hospital of CACMS         | 73          | Female | 8.4        | 20         | 25.69      | /          | /          |
| Li Xiaosheng   | Hot-RA         | Wang Jing Hospital of CACMS         | 72          | Male   | 68.3       | 72         | 28.9       | /          | /          |
| Lin Liping     | Hot-RA         | Henan Rheumatism Hospital           | 50          | Female | 5.5        | 104        | 91.3       | /          | /          |
| Yu Yanyan      | Hot-RA         | Henan Rheumatism Hospital           | 27          | Female | 146.8      | 62         | 38.39      | /          | /          |
| Zhao Jinglan   | Hot-RA         | Wang Jing Hospital of CACMS         | 39          | Female | 9.0        | 6          | 1.2        | /          | /          |
| Yang Shiyang   | Hot-RA         | Wang Jing Hospital of CACMS         | 78          | Female | 17.2       | 39         | 12.6       | /          | /          |

|               |                |                                                      |     |        |        |     |        |      |      |
|---------------|----------------|------------------------------------------------------|-----|--------|--------|-----|--------|------|------|
| Yin Mingrui   | Hot-RA         | Henan Rheumatism Hospital                            | 31  | Female | 123.52 | 41  | 47.22  | /    | /    |
| Xing Shuili   | Hot-RA         | Henan Rheumatism Hospital                            | 40  | Female | 20.21  | 110 | 146.82 | /    | /    |
| Yang Jianju   | Hot-RA         | Henan Rheumatism Hospital                            | 75  | Female | 111.46 | 100 | 115.74 | /    | /    |
| Zhao Aiyun    | Hot-RA         | Henan Rheumatism Hospital                            | 69  | Female | 27.15  | 94  | 53.24  | /    | /    |
| Zhou Guiying  | Hot-RA         | Henan Rheumatism Hospital                            | 53  | Female | 102.90 | 30  | 16.720 | /    | /    |
| Shi Haijian   | Hot-RA         | Xi'an Red Cross Hospital                             | 59  | Female | 89.50  | 70  | 19.45  | /    | /    |
| Wang Fan      | Normal Control | Sports Medicine Hospital (Beijing)                   | 28  | Male   | /      | 14  | /      | /    | /    |
| Wang Guixiang | Hot-RA         | Henan Rheumatism Hospital                            | 55  | Female | 98.1   | 73  | 59.87  | /    | /    |
| Wang Yumei    | Cold-RA        | Xi'an Red Cross Hospital                             | 74  | Female | 133.70 | 119 | 36.11  | /    | /    |
| Wu Zhengxian  | Hot-RA         | General Hospital of Southern Theatre Command         | 38  | Female | /      | /   | /      | /    | /    |
| Xu Xiaoling   | Hot-RA         | General Hospital of Southern Theatre Command         | 63  | Female | 193.00 | 76  | 90.2   | /    | /    |
| A3            | Hot-RA         | Guang'anmen Hospital of CACMS                        | 55  | Female | /      | /   | /      | 4.66 | /    |
| A5            | Hot-RA         | Guang'anmen Hospital of CACMS                        | 56  | Female | /      | /   | /      | 4.65 | /    |
| A10           | Hot-RA         | Guang'anmen Hospital of CACMS                        | 54  | Female | /      | /   | /      | /    | /    |
| Wang Wenyan   | Cold-RA        | First Teaching Hospital of Tianjin University of TCM | 32  | Female | 98.1   | 25  | 6.8    | 3.61 | 3.05 |
| Luo Shaoling  | Cold-RA        | First Teaching Hospital of Tianjin University of TCM | 64  | Female | 8.38   | 43  | <3.11  | 5.62 | /    |
| Liu Sheng     | Cold-RA        | First Teaching Hospital of Tianjin University of TCM | 66  | Male   | 46.1   | 27  | <3.13  | 4.06 | /    |
| Liu Si        | Normal Control | Sports Medicine Hospital (Beijing)                   | 34  | Female | /      | 18  | /      | /    | /    |
| NC2           | Normal Control | Sports Medicine Hospital (Beijing)                   | N/A | N/A    | /      | /   | /      | /    | /    |
| He Fan        | Normal Control | Sports Medicine Hospital (Beijing)                   | 42  | Male   | /      | 5   | /      | /    | /    |
| Zhang Xiuping | Normal Control | Sports Medicine Hospital (Beijing)                   | N/A | N/A    | /      | /   | /      | /    | /    |
| Normal        | Normal Control | Sports Medicine Hospital (Beijing)                   | N/A | N/A    | /      | /   | /      | /    | /    |
| Guo Jiawei    | Normal Control | Sports Medicine Hospital (Beijing)                   | N/A | N/A    | /      | 2   | /      | /    | /    |
| Liu Heng      | Normal Control | Sports Medicine Hospital (Beijing)                   | 23  | Male   | /      | /   | /      | /    | /    |
| Li Kunyuan    | Normal Control | Sports Medicine Hospital (Beijing)                   | 18  | Female | /      | 28  | /      | /    | /    |
| Cao Yanfei    | Normal Control | Sports Medicine Hospital (Beijing)                   | 18  | Male   | /      | 2   | /      | /    | /    |
| Liu Bei       | Normal Control | Sports Medicine Hospital (Beijing)                   | 19  | Female | /      | 4   | /      | /    | /    |
| Diao Shoushi  | Hot-RA         | Henan Rheumatism Hospital                            | 57  | Male   | 134.26 | 35  | 14.35  | /    | /    |
| Feng Jinzhu   | Hot-RA         | Henan Rheumatism Hospital                            | 18  | Female | 156.87 | 32  | 24.93  | /    | /    |
| Gao Hongxia   | Hot-RA         | Henan Rheumatism Hospital                            | 41  | Female | 137.02 | 53  | 48.94  | /    | /    |
| Hu Min        | Hot-RA         | Henan Rheumatism Hospital                            | 28  | Female | 165.81 | 68  | 16.89  | /    | /    |
| Li Ailian     | Hot-RA         | Henan Rheumatism Hospital                            | 51  | Female | 156.02 | 106 | 141.14 | /    | /    |
| Liu Bohan     | Hot-RA         | Henan Rheumatism Hospital                            | 16  | Female | 126.18 | 36  | 81.42  | /    | /    |

|               |                |                                                      |      |        |        |     |        |      |      |
|---------------|----------------|------------------------------------------------------|------|--------|--------|-----|--------|------|------|
| Lu Xiaowu     | Hot-RA         | Henan Rheumatism Hospital                            | 51   | Female | 81     | 108 | 24.7   | /    | /    |
| Qu Xiaohong   | Hot-RA         | Henan Rheumatism Hospital                            | 47   | Female | 167.14 | 41  | 14.13  | /    | /    |
| Sun Fuxiang   | Hot-RA         | Henan Rheumatism Hospital                            | 47   | Female | 114.78 | 79  | 32.92  | /    | /    |
| Li Erling     | Cold-RA        | Henan Rheumatism Hospital                            | 46   | Female | 122.48 | 42  | 56.53  | /    | /    |
| Li Changsuo   | Cold-RA        | Henan Rheumatism Hospital                            | N/A  | N/A    | 137.49 | 54  | 24.4   | /    | /    |
| Qi Guiying    | Cold-RA        | Henan Rheumatism Hospital                            | N/A  | N/A    | 126.75 | 93  | 31.21  | /    | /    |
| Li Huishen    | Cold-RA        | Wang Jing Hospital of CACMS                          | N/A  | N/A    | /      | /   | /      | /    | /    |
| Wei Yanling   | Cold-RA        | Henan Rheumatism Hospital                            | 37   | Female | 141.86 | 84  | 80.88  | /    | /    |
| Xu Qiumei     | Cold-RA        | Henan Rheumatism Hospital                            | 52   | Female | 131.12 | 30  | 28.63  | /    | /    |
| Zhao Weixun   | Cold-RA        | Wang Jing Hospital of CACMS                          | N/A  | N/A    | /      | /   | /      | /    | /    |
| LM            | Normal Control | First Teaching Hospital of Tianjin University of TCM | 26   | Female | /      | /   | /      | /    | /    |
| SQH           | Normal Control | First Teaching Hospital of Tianjin University of TCM | 26   | Male   | /      | /   | /      | /    | /    |
| ZQ            | Normal Control | First Teaching Hospital of Tianjin University of TCM | 27   | Female | /      | /   | /      | /    | /    |
| YP            | Normal Control | First Teaching Hospital of Tianjin University of TCM | 29   | Male   | /      | /   | /      | /    | /    |
| king          | Normal Control | Sports Medicine Hospital (Beijing)                   | N/A  | N/A    | /      | /   | /      | /    | /    |
| 20181229      | Normal Control | Sports Medicine Hospital (Beijing)                   | N/A  | N/A    | /      | /   | /      | /    | /    |
| Zhang Chunran | Normal Control | Wang Jing Hospital of CACMS                          | 79   | Female | /      | /   | /      | /    | /    |
| Ren Na        | Normal Control | Sports Medicine Hospital (Beijing)                   | 31   | Female | /      | 6   | /      | /    | /    |
| WY            | Normal Control | First Teaching Hospital of Tianjin University of TCM | 62   | Male   | /      | /   | /      | /    | /    |
| DK            | Normal Control | First Teaching Hospital of Tianjin University of TCM | 56   | Male   | /      | /   | /      | /    | /    |
| SO            | Normal Control | First Teaching Hospital of Tianjin University of TCM | 31   | Male   | /      | /   | /      | /    | /    |
| AH            | Normal Control | First Teaching Hospital of Tianjin University of TCM | 28   | Female | /      | /   | /      | /    | /    |
| XP            | Normal Control | First Teaching Hospital of Tianjin University of TCM | 25   | Female | /      | /   | /      | /    | /    |
| PH            | Normal Control | First Teaching Hospital of Tianjin University of TCM | 27   | Male   | /      | /   | /      | /    | /    |
| FCN           | Normal Control | First Teaching Hospital of Tianjin University of TCM | 44   | Female | /      | /   | /      | /    | /    |
| XY            | Normal Control | First Teaching Hospital of Tianjin University of TCM | 39   | Female | /      | /   | /      | /    | /    |
| JL            | Normal Control | First Teaching Hospital of Tianjin University of TCM | 23   | Male   | /      | /   | /      | /    | /    |
| YX            | Normal Control | First Teaching Hospital of Tianjin University of TCM | 23   | Female | /      | /   | /      | /    | /    |
| Wang Guiyuan  | Cold-RA        | Gansu Provincial TCM Hospital                        | 58   | Female | /      | 38  | 2.31   | 5.98 | 4.82 |
| Shi Junfen    | Cold-RA        | Gansu Provincial TCM Hospital                        | 52.5 | Female | /      | 43  | 13.44  | 6.17 | 5.46 |
| Xue Lanhua    | Cold-RA        | Gansu Provincial TCM Hospital                        | 50   | Female | /      | 65  | 68.42  | 6.79 | 6.35 |
| Marshmai      | Cold-RA        | Gansu Provincial TCM Hospital                        | 49   | Female | /      | 30  | 17.86  | 5.58 | 5.22 |
| Yan Yuling    | Cold-RA        | Gansu Provincial TCM Hospital                        | 51   | Female | /      | 83  | 114.58 | 6.94 | 6.52 |

|              |         |                                                      |     |        |       |    |        |      |      |
|--------------|---------|------------------------------------------------------|-----|--------|-------|----|--------|------|------|
| Wu Guoqiao   | Cold-RA | Gansu Provincial TCM Hospital                        | 45  | Female | /     | 8  | 2.76   | 3.39 | 3.37 |
| Wei Ga'e     | Cold-RA | Gansu Provincial TCM Hospital                        | 48  | Female | /     | 67 | 32.15  | 6.91 | 6.19 |
| Yong Jianmin | Cold-RA | Gansu Provincial TCM Hospital                        | 50  | Male   | /     | 42 | 9.51   | 4.86 | 4.05 |
| Wang Xianxiu | Cold-RA | Gansu Provincial TCM Hospital                        | 48  | Female | /     | 4  | 2.63   | 4.58 | 5.03 |
| Lan Yinhua   | Cold-RA | Gansu Provincial TCM Hospital                        | 47  | Female | /     | 20 | 6.23   | 6.27 | 5.84 |
| Zou Yueqin   | Cold-RA | Gansu Provincial TCM Hospital                        | 49  | Female | /     | 90 | 63.31  | 7.29 | 6.60 |
| Zhang Yanmei | Cold-RA | Gansu Provincial TCM Hospital                        | 60  | Female | /     | 7  | 4.5    | 4.54 | 4.75 |
| Liu Suping   | Cold-RA | Gansu Provincial TCM Hospital                        | 56  | Female | /     | 7  | 3.84   | 4.83 | 4.99 |
| Du Xishun    | Cold-RA | Gansu Provincial TCM Hospital                        | 50  | Female | /     | 46 | 42.16  | 6.59 | 6.22 |
| Wang Youju   | Cold-RA | Gansu Provincial TCM Hospital                        | 46  | Female | /     | 20 | 19.03  | 5.88 | 5.82 |
| LZW          | Cold-RA | First Teaching Hospital of Tianjin University of TCM | 26  | Female | 20    | 13 | 2.42   | 3.82 | 3.43 |
| BFQ          | Cold-RA | First Teaching Hospital of Tianjin University of TCM | 67  | Female | 9.19  | 26 | <3.13  | 3.82 | /    |
| LLD          | Cold-RA | First Teaching Hospital of Tianjin University of TCM | 58  | Male   | 9.19  | 11 | <3.13  | 1.82 | /    |
| WJX          | Cold-RA | First Teaching Hospital of Tianjin University of TCM | 38  | Female | 9.19  | 3  | <3.13  | 2.69 | /    |
| G CJ         | Cold-RA | First Teaching Hospital of Tianjin University of TCM | 70  | Male   | 567   | 81 | 45.4   | 5.37 | 4.63 |
| Chen Yanfei  | Cold-RA | Henan Rheumatism Hospital                            | N/A | N/A    | 18.82 | 99 | 141.19 |      | /    |
| XGR          | Hot-RA  | First Teaching Hospital of Tianjin University of TCM | 58  | Female | 20.6  | 66 | 55.3   | 5.81 | 5.29 |
| ZQP          | Hot-RA  | First Teaching Hospital of Tianjin University of TCM | 60  | Female | 24.4  | 49 | 3.11   | 5.99 | /    |
| XYR          | Hot-RA  | First Teaching Hospital of Tianjin University of TCM | 62  | Female | 58.6  | 43 | 3.11   | 4.93 | /    |
| HYB          | Hot-RA  | First Teaching Hospital of Tianjin University of TCM | 48  | Female | 395   | 28 | 20.7   | 6.73 | 6.47 |
| YJH          | Hot-RA  | First Teaching Hospital of Tianjin University of TCM | 58  | Female | 9.19  | 23 | 3.11   | 5.58 | /    |
| ZRY          | Hot-RA  | First Teaching Hospital of Tianjin University of TCM | 55  | Female | 112   | 56 | 7.91   | 6.23 | 5.16 |
| FRJ          | Hot-RA  | First Teaching Hospital of Tianjin University of TCM | 56  | Female | 64.4  | 72 | 25.6   | 6.86 | 6.01 |
| WXL          | Hot-RA  | First Teaching Hospital of Tianjin University of TCM | 59  | Female | 433   | 45 | 17.6   | 5.25 | 4.60 |
| ZYL          | Hot-RA  | First Teaching Hospital of Tianjin University of TCM | 71  | Male   | 9.19  | 41 | 82.4   | 6.76 | 6.71 |
| LYZ          | Hot-RA  | First Teaching Hospital of Tianjin University of TCM | 65  | Female | 13.4  | 26 | 6.94   | 4.70 | 4.12 |
| ZSJ          | Hot-RA  | First Teaching Hospital of Tianjin University of TCM | 52  | Female | 171   | 16 | 3.13   | 3.75 | /    |
| HSH          | Hot-RA  | First Teaching Hospital of Tianjin University of TCM | 64  | Female | 20    | 52 | 12.2   | 6.67 | 5.79 |
| ZXZ          | Hot-RA  | First Teaching Hospital of Tianjin University of TCM | 65  | Female | 9.19  | 16 | 4.38   | 3.47 | 3.09 |
| LYQ          | Hot-RA  | First Teaching Hospital of Tianjin University of TCM | 62  | Female | 11.9  | 16 | 3.13   | 3.59 | /    |
| MX Y         | Hot-RA  | First Teaching Hospital of Tianjin University of TCM | 74  | Female | 12.5  | 74 | 23.4   | 6.53 | 5.63 |
| Zhang Hong   | Hot-RA  | Henan Rheumatism Hospital                            | 53  | Female | 14.51 | 31 | 19.8   | /    | /    |
| Yuan Sen     | Hot-RA  | Henan Rheumatism Hospital                            | 38  | Male   | /     | 93 | 112.38 | /    | /    |

|              |        |                           |    |      |        |    |       |   |   |
|--------------|--------|---------------------------|----|------|--------|----|-------|---|---|
| Wang Xinmin  | Hot-RA | Henan Rheumatism Hospital | 66 | Male | 116.30 | 60 | 19.94 | / | / |
| Zhang Haojun | Hot-RA | Henan Rheumatism Hospital | 53 | Male | 30.29  | 51 | 80.28 | / | / |

---
