# Supplementary material for: Integrative network fusion-based multi-omics study for biomarker identification and patient classification of rheumatoid arthritis
Source: PubMed Central journal article supplement (PMC10158004; doi:10.1186/s13020-023-00750-8), 2023-05-04
Supplement: 13020_2023_750_MOESM2_ESM.pdf [file 13020_2023_750_MOESM2_ESM.pdf]

**Table S2.1. WikiPathways enriched by key network targets of RA-Cold**

| No | Type     | Name                                                                         | Number of hits | Expected score | Adjusted p-value |
|----|----------|------------------------------------------------------------------------------|----------------|----------------|------------------|
| 1  | enriched | Allograft Rejection                                                          | 25             | 1.19439        | 2.11E-020        |
| 2  | enriched | Viral Acute Myocarditis                                                      | 22             | 1.12729        | 1.93E-017        |
| 3  | enriched | T-Cell antigen Receptor (TCR) Signaling Pathway                              | 22             | 1.20781        | 4.62E-017        |
| 4  | enriched | Regulation of toll-like receptor signaling pathway                           | 23             | 1.8654         | 9.94E-015        |
| 5  | enriched | Type II interferon signaling (IFNG)                                          | 15             | 0.496544       | 4.43E-014        |
| 6  | enriched | T-Cell antigen Receptor (TCR) pathway during Staphylococcus aureus infection | 16             | 0.832047       | 1.32E-012        |
| 7  | enriched | Chemokine signaling pathway                                                  | 22             | 2.2009         | 1.46E-012        |
| 8  | enriched | Toll-like Receptor Signaling Pathway                                         | 18             | 1.38227        | 7.00E-012        |
| 9  | enriched | B Cell Receptor Signaling Pathway                                            | 17             | 1.30175        | 3.13E-011        |
| 10 | enriched | Interactions between immune cells and microRNAs in tumor microenvironment    | 11             | 0.375763       | 3.63E-010        |
| 11 | enriched | Selective expression of chemokine receptors during T-cell polarization       | 11             | 0.389183       | 4.50E-010        |
| 12 | enriched | Non-genomic actions of 1,25 dihydroxyvitamin D3                              | 14             | 0.952828       | 8.35E-010        |
| 13 | enriched | Lung fibrosis                                                                | 13             | 0.845467       | 2.55E-009        |
| 14 | enriched | PI3K-Akt Signaling Pathway                                                   | 25             | 4.56284        | 2.55E-009        |
| 15 | enriched | Spinal Cord Injury                                                           | 16             | 1.55673        | 2.55E-009        |
| 16 | enriched | Cytokines and Inflammatory Response                                          | 10             | 0.348923       | 2.60E-009        |
| 17 | enriched | miRNAs involvement in the immune response in sepsis                          | 11             | 0.496544       | 2.60E-009        |
| 18 | enriched | Nucleotide-binding Oligomerization Domain (NOD) pathway                      | 11             | 0.550225       | 6.24E-009        |
| 19 | enriched | Hematopoietic Stem Cell Differentiation                                      | 12             | 0.738106       | 6.31E-009        |
| 20 | enriched | Ebola Virus Pathway on Host                                                  | 16             | 1.73119        | 7.86E-009        |
| 21 | enriched | Hepatitis B infection                                                        | 17             | 2.02644        | 7.86E-009        |
| 22 | enriched | Cancer immunotherapy by PD-1 blockade                                        | 9              | 0.308663       | 1.72E-008        |
| 23 | enriched | Thymic Stromal LymphoPoietin (TSLP) Signaling Pathway                        | 11             | 0.630745       | 1.72E-008        |
| 24 | enriched | Apoptosis                                                                    | 13             | 1.12729        | 3.49E-008        |
| 25 | enriched | Pancreatic adenocarcinoma pathway                                            | 13             | 1.19439        | 6.34E-008        |
| 26 | enriched | IL-2 Signaling Pathway                                                       | 10             | 0.563645       | 8.63E-008        |
| 27 | enriched | Vitamin D Receptor Pathway                                                   | 17             | 2.44246        | 8.63E-008        |
| 28 | enriched | Inflammatory Response Pathway                                                | 9              | 0.402603       | 9.84E-008        |
| 29 | enriched | Regulatory circuits of the STAT3 signaling pathway                           | 12             | 1.04677        | 1.44E-007        |
| 30 | enriched | Osteoblast Signaling                                                         | 7              | 0.187882       | 3.67E-007        |
| 31 | enriched | IL-7 Signaling Pathway                                                       | 8              | 0.335503       | 4.82E-007        |
| 32 | enriched | Microglia Pathogen Phagocytosis Pathway                                      | 9              | 0.536804       | 7.44E-007        |
| 33 | enriched | Fibrin Complement Receptor 3 Signaling Pathway                               | 9              | 0.550225       | 8.70E-007        |
| 34 | enriched | Breast cancer pathway                                                        | 14             | 2.0667         | 2.74E-006        |
| 35 | enriched | Adipogenesis                                                                 | 13             | 1.74461        | 2.86E-006        |
| 36 | enriched | DNA Damage Response (only ATM dependent)                                     | 12             | 1.47621        | 3.79E-006        |
| 37 | enriched | Control of immune tolerance by vasoactive intestinal peptide                 | 6              | 0.174461       | 5.44E-006        |
| 38 | enriched | PDGF Pathway                                                                 | 8              | 0.523384       | 7.58E-006        |
| 39 | enriched | Leptin signaling pathway                                                     | 10             | 1.01993        | 8.84E-006        |

|    |          |                                                                                        |    |          |           |
|----|----------|----------------------------------------------------------------------------------------|----|----------|-----------|
| 40 | enriched | Kit receptor signaling pathway                                                         | 9  | 0.791786 | 1.15E-005 |
| 41 | enriched | DNA IR-damage and cellular response via ATR                                            | 10 | 1.07361  | 1.30E-005 |
| 42 | enriched | Interleukin-11 Signaling Pathway                                                       | 8  | 0.590485 | 1.55E-005 |
| 43 | enriched | Senescence and Autophagy in Cancer                                                     | 11 | 1.40911  | 1.61E-005 |
| 44 | enriched | Toll-like Receptor Signaling related to MyD88                                          | 7  | 0.416023 | 2.24E-005 |
| 45 | enriched | LTF danger signal response pathway                                                     | 6  | 0.254982 | 2.73E-005 |
| 46 | enriched | DNA Damage Response                                                                    | 9  | 0.912567 | 2.88E-005 |
| 47 | enriched | Hepatitis C and Hepatocellular Carcinoma                                               | 8  | 0.657585 | 2.88E-005 |
| 48 | enriched | Resistin as a regulator of inflammation                                                | 7  | 0.442864 | 2.97E-005 |
| 49 | enriched | Focal Adhesion                                                                         | 14 | 2.65718  | 3.31E-005 |
| 50 | enriched | miRNA Regulation of DNA Damage Response                                                | 9  | 0.952828 | 3.76E-005 |
| 51 | enriched | Brain-Derived Neurotrophic Factor (BDNF) signaling pathway                             | 12 | 1.9325   | 3.88E-005 |
| 52 | enriched | Photodynamic therapy-induced NF-kB survival signaling                                  | 7  | 0.469704 | 3.88E-005 |
| 53 | enriched | VEGFA-VEGFR2 Signaling Pathway                                                         | 15 | 3.16715  | 4.41E-005 |
| 54 | enriched | Cytosolic DNA-sensing pathway                                                          | 9  | 0.993088 | 4.66E-005 |
| 55 | enriched | IL-4 Signaling Pathway                                                                 | 8  | 0.724686 | 4.66E-005 |
| 56 | enriched | Interferon type I signaling pathways                                                   | 8  | 0.724686 | 4.66E-005 |
| 57 | enriched | DNA IR-Double Strand Breaks (DSBs) and cellular response via ATM                       | 8  | 0.738106 | 5.09E-005 |
| 58 | enriched | RANKL/RANK (Receptor activator of NFkB (ligand)) Signaling Pathway                     | 8  | 0.738106 | 5.09E-005 |
| 59 | enriched | The human immune response to tuberculosis                                              | 6  | 0.308663 | 5.35E-005 |
| 60 | enriched | Integrated Breast Cancer Pathway                                                       | 12 | 2.03986  | 5.60E-005 |
| 61 | enriched | IL1 and megakaryocytes in obesity                                                      | 6  | 0.322083 | 6.39E-005 |
| 62 | enriched | IL-5 Signaling Pathway                                                                 | 7  | 0.536804 | 7.16E-005 |
| 63 | enriched | Signaling Pathways in Glioblastoma                                                     | 9  | 1.10045  | 8.88E-005 |
| 64 | enriched | EPO Receptor Signaling                                                                 | 6  | 0.348923 | 9.03E-005 |
| 65 | enriched | Fas Ligand (FasL) pathway and Stress induction of Heat Shock Proteins (HSP) regulation | 7  | 0.563645 | 9.03E-005 |
| 66 | enriched | Notch Signaling Pathway Netpath                                                        | 8  | 0.818627 | 9.03E-005 |
| 67 | enriched | Cancer immunotherapy by CTLA4 blockade                                                 | 5  | 0.187882 | 9.84E-005 |
| 68 | enriched | MicroRNAs in cardiomyocyte hypertrophy                                                 | 9  | 1.12729  | 9.87E-005 |
| 69 | enriched | IL-6 signaling pathway                                                                 | 7  | 0.577065 | 9.88E-005 |
| 70 | enriched | TLR4 Signaling and Tolerance                                                           | 6  | 0.375763 | 1.21E-004 |
| 71 | enriched | ATM Signaling Network in Development and Disease                                       | 7  | 0.603905 | 1.26E-004 |
| 72 | enriched | Oncostatin M Signaling Pathway                                                         | 8  | 0.872307 | 1.27E-004 |
| 73 | enriched | AGE/RAGE pathway                                                                       | 8  | 0.885727 | 1.33E-004 |
| 74 | enriched | Focal Adhesion-PI3K-Akt-mTOR-signaling pathway                                         | 16 | 4.06629  | 1.33E-004 |
| 75 | enriched | PDGFR-beta pathway                                                                     | 6  | 0.389183 | 1.33E-004 |
| 76 | enriched | T-Cell Receptor and Co-stimulatory Signaling                                           | 6  | 0.389183 | 1.33E-004 |
| 77 | enriched | Osteoclast Signaling                                                                   | 5  | 0.214722 | 1.47E-004 |
| 78 | enriched | RAC1/PAK1/p38/MMP2 Pathway                                                             | 8  | 0.912567 | 1.59E-004 |
| 79 | enriched | Differentiation Pathway                                                                | 7  | 0.644165 | 1.66E-004 |
| 80 | enriched | Platelet-mediated interactions with vascular and circulating cells                     | 5  | 0.228142 | 1.81E-004 |
| 81 | enriched | IL-3 Signaling Pathway                                                                 | 7  | 0.657585 | 1.83E-004 |

|     |          |                                                                            |    |           |           |
|-----|----------|----------------------------------------------------------------------------|----|-----------|-----------|
| 82  | enriched | Hippo-Merlin Signaling Dysregulation                                       | 10 | 1.61041   | 1.90E-004 |
| 83  | enriched | Development and heterogeneity of the ILC family                            | 6  | 0.429444  | 1.96E-004 |
| 84  | enriched | Mammary gland development pathway - Pregnancy and lactation (Stage 3 of 4) | 6  | 0.429444  | 1.96E-004 |
| 85  | enriched | Photodynamic therapy-induced AP-1 survival signaling.                      | 7  | 0.671005  | 1.96E-004 |
| 86  | enriched | Small cell lung cancer                                                     | 9  | 1.27491   | 1.96E-004 |
| 87  | enriched | MAPK Signaling Pathway                                                     | 14 | 3.30135   | 2.00E-004 |
| 88  | enriched | Simplified Depiction of MYD88 Distinct Input-Output Pathway                | 5  | 0.241562  | 2.08E-004 |
| 89  | enriched | Signal transduction through IL1R                                           | 6  | 0.442864  | 2.18E-004 |
| 90  | enriched | Prolactin Signaling Pathway                                                | 8  | 1.01993   | 2.89E-004 |
| 91  | enriched | TGF-beta Receptor Signaling                                                | 7  | 0.724686  | 2.89E-004 |
| 92  | enriched | IL-1 signaling pathway                                                     | 7  | 0.738106  | 3.19E-004 |
| 93  | enriched | EGF/EGFR Signaling Pathway                                                 | 11 | 2.16064   | 3.48E-004 |
| 94  | enriched | Role of Altered Glycolysation of MUC1 in Tumour Microenvironment           | 4  | 0.120781  | 3.50E-004 |
| 95  | enriched | PI3K/AKT/mTOR - VitD3 Signalling                                           | 5  | 0.295242  | 4.37E-004 |
| 96  | enriched | Vitamin D in inflammatory diseases                                         | 5  | 0.295242  | 4.37E-004 |
| 97  | enriched | Gastrin Signaling Pathway                                                  | 9  | 1.52989   | 6.64E-004 |
| 98  | enriched | Hair Follicle Development: Cytodifferentiation (Part 3 of 3)               | 8  | 1.16755   | 6.64E-004 |
| 99  | enriched | Genes involved in male infertility                                         | 10 | 1.95934   | 7.66E-004 |
| 100 | enriched | Apoptosis Modulation and Signaling                                         | 8  | 1.20781   | 8.04E-004 |
| 101 | enriched | IL-10 Anti-inflammatory Signaling Pathway                                  | 4  | 0.161041  | 8.04E-004 |
| 102 | enriched | Head and Neck Squamous Cell Carcinoma                                      | 7  | 0.885727  | 8.18E-004 |
| 103 | enriched | Human Thyroid Stimulating Hormone (TSH) signaling pathway                  | 7  | 0.885727  | 8.18E-004 |
| 104 | enriched | Integrated Cancer Pathway                                                  | 6  | 0.590485  | 8.18E-004 |
| 105 | enriched | Wnt/beta-catenin Signaling Pathway in Leukemia                             | 5  | 0.348923  | 8.18E-004 |
| 106 | enriched | Ras Signaling                                                              | 11 | 2.4693    | 9.66E-004 |
| 107 | enriched | Serotonin Receptor 2 and STAT3 Signaling                                   | 3  | 0.0536804 | 1.21E-003 |
| 108 | enriched | Human Complement System                                                    | 8  | 1.30175   | 1.22E-003 |
| 109 | enriched | Sudden Infant Death Syndrome (SIDS) Susceptibility Pathways                | 10 | 2.10696   | 1.24E-003 |
| 110 | enriched | Non-small cell lung cancer                                                 | 7  | 0.966248  | 1.29E-003 |
| 111 | enriched | Primary Focal Segmental Glomerulosclerosis FSGS                            | 7  | 0.966248  | 1.29E-003 |
| 112 | enriched | Chromosomal and microsatellite instability in colorectal cancer            | 7  | 0.979668  | 1.38E-003 |
| 113 | enriched | Mammary gland development pathway - Embryonic development (Stage 1 of 4)   | 4  | 0.201302  | 1.46E-003 |
| 114 | enriched | Peptide GPCRs                                                              | 7  | 0.993088  | 1.46E-003 |
| 115 | enriched | miRNAs involved in DNA damage response                                     | 4  | 0.201302  | 1.46E-003 |
| 116 | enriched | Wnt Signaling Pathway (Netpath)                                            | 6  | 0.697846  | 1.68E-003 |
| 117 | enriched | IL17 signaling pathway                                                     | 5  | 0.429444  | 1.72E-003 |
| 118 | enriched | Monoamine Transport                                                        | 5  | 0.429444  | 1.72E-003 |
| 119 | enriched | miRNA regulation of prostate cancer signaling pathways                     | 5  | 0.442864  | 1.95E-003 |
| 120 | enriched | Cells and Molecules involved in local acute inflammatory response          | 4  | 0.228142  | 2.09E-003 |
| 121 | enriched | IL-9 Signaling Pathway                                                     | 4  | 0.228142  | 2.09E-003 |
| 122 | enriched | Nuclear Receptors Meta-Pathway                                             | 14 | 4.28102   | 2.10E-003 |

|     |          |                                                                                                                  |   |          |           |
|-----|----------|------------------------------------------------------------------------------------------------------------------|---|----------|-----------|
| 123 | enriched | Alzheimers Disease                                                                                               | 7 | 1.10045  | 2.47E-003 |
| 124 | enriched | Overview of nanoparticle effects                                                                                 | 4 | 0.254982 | 2.94E-003 |
| 125 | enriched | TP53 Network                                                                                                     | 4 | 0.254982 | 2.94E-003 |
| 126 | enriched | Mesodermal Commitment Pathway                                                                                    | 9 | 1.97276  | 3.20E-003 |
| 127 | enriched | TYROBP Causal Network                                                                                            | 6 | 0.818627 | 3.43E-003 |
| 128 | enriched | ATM Signaling Pathway                                                                                            | 5 | 0.536804 | 4.02E-003 |
| 129 | enriched | Androgen receptor signaling pathway                                                                              | 7 | 1.20781  | 4.02E-003 |
| 130 | enriched | Cell Cycle                                                                                                       | 8 | 1.61041  | 4.02E-003 |
| 131 | enriched | Corticotropin-releasing hormone signaling pathway                                                                | 7 | 1.23465  | 4.44E-003 |
| 132 | enriched | TNF alpha Signaling Pathway                                                                                      | 7 | 1.23465  | 4.44E-003 |
| 133 | enriched | Estrogen signaling pathway                                                                                       | 4 | 0.308663 | 5.25E-003 |
| 134 | enriched | Cytosine methylation                                                                                             | 3 | 0.120781 | 5.80E-003 |
| 135 | enriched | miRNA regulation of p53 pathway in prostate cancer                                                               | 4 | 0.322083 | 5.97E-003 |
| 136 | enriched | Pathways Regulating Hippo Signaling                                                                              | 7 | 1.31517  | 6.16E-003 |
| 137 | enriched | Aryl Hydrocarbon Receptor Pathway                                                                                | 5 | 0.617325 | 6.83E-003 |
| 138 | enriched | Regulation of Microtubule Cytoskeleton                                                                           | 5 | 0.617325 | 6.83E-003 |
| 139 | enriched | Canonical and Non-canonical Notch signaling                                                                      | 4 | 0.362343 | 8.64E-003 |
| 140 | enriched | Cardiac Progenitor Differentiation                                                                               | 5 | 0.711266 | 1.21E-002 |
| 141 | enriched | Dopaminergic Neurogenesis                                                                                        | 4 | 0.402603 | 1.21E-002 |
| 142 | enriched | Oligodendrocyte Specification and differentiation(including remyelination), leading to Myelin Components for CNS | 4 | 0.402603 | 1.21E-002 |
| 143 | enriched | Cell-type Dependent Selectivity of CCK2R Signaling                                                               | 3 | 0.174461 | 1.31E-002 |
| 144 | enriched | Development of pulmonary dendritic cells and macrophage subsets                                                  | 3 | 0.174461 | 1.31E-002 |
| 145 | enriched | ncRNAs involved in STAT3 signaling in hepatocellular carcinoma                                                   | 3 | 0.174461 | 1.31E-002 |
| 146 | enriched | ESC Pluripotency Pathways                                                                                        | 7 | 1.55673  | 1.47E-002 |
| 147 | enriched | Pathways in clear cell renal cell carcinoma                                                                      | 6 | 1.14071  | 1.52E-002 |
| 148 | enriched | Retinoblastoma Gene in Cancer                                                                                    | 6 | 1.16755  | 1.69E-002 |
| 149 | enriched | Role of Osx and miRNAs in tooth development                                                                      | 3 | 0.201302 | 1.83E-002 |
| 150 | enriched | Novel intracellular components of RIG-I-like receptor (RLR) pathway                                              | 5 | 0.805207 | 1.90E-002 |
| 151 | enriched | Overview of leukocyte-intrinsic Hippo pathway functions                                                          | 4 | 0.469704 | 1.91E-002 |
| 152 | enriched | Epithelial to mesenchymal transition in colorectal cancer                                                        | 8 | 2.1338   | 1.95E-002 |
| 153 | enriched | ErbB Signaling Pathway                                                                                           | 6 | 1.22123  | 2.03E-002 |
| 154 | enriched | Overview of interferons-mediated signaling pathway                                                               | 4 | 0.483124 | 2.06E-002 |
| 155 | enriched | Amyotrophic lateral sclerosis (ALS)                                                                              | 4 | 0.496544 | 2.22E-002 |
| 156 | enriched | Endometrial cancer                                                                                               | 5 | 0.845467 | 2.22E-002 |
| 157 | enriched | Neovascularisation processes                                                                                     | 4 | 0.496544 | 2.22E-002 |
| 158 | enriched | LncRNA involvement in canonical Wnt signaling and colorectal cancer                                              | 6 | 1.26149  | 2.29E-002 |
| 159 | enriched | Amplification and Expansion of Oncogenic Pathways as Metastatic Traits                                           | 3 | 0.228142 | 2.30E-002 |
| 160 | enriched | Endochondral Ossification                                                                                        | 5 | 0.858887 | 2.30E-002 |
| 161 | enriched | G1 to S cell cycle control                                                                                       | 5 | 0.858887 | 2.30E-002 |
| 162 | enriched | Leptin Insulin Overlap                                                                                           | 3 | 0.228142 | 2.30E-002 |

|     |          |                                                                    |   |           |           |
|-----|----------|--------------------------------------------------------------------|---|-----------|-----------|
| 163 | enriched | Pathways Affected in Adenoid Cystic Carcinoma                      | 5 | 0.872307  | 2.43E-002 |
| 164 | enriched | MicroRNA network associated with chronic lymphocytic leukemia      | 2 | 0.0536804 | 2.58E-002 |
| 165 | enriched | Oxytocin signaling                                                 | 2 | 0.0536804 | 2.58E-002 |
| 166 | enriched | TGF-beta Signaling Pathway                                         | 7 | 1.77145   | 2.59E-002 |
| 167 | enriched | Bladder Cancer                                                     | 4 | 0.536804  | 2.71E-002 |
| 168 | enriched | Extracellular vesicles in the crosstalk of cardiac cells           | 3 | 0.254982  | 2.94E-002 |
| 169 | enriched | Integrin-mediated Cell Adhesion                                    | 6 | 1.35543   | 3.01E-002 |
| 170 | enriched | TNF related weak inducer of apoptosis (TWEAK) Signaling Pathway    | 4 | 0.563645  | 3.12E-002 |
| 171 | enriched | Wnt Signaling Pathway and Pluripotency                             | 6 | 1.36885   | 3.12E-002 |
| 172 | enriched | Hematopoietic Stem Cell Gene Regulation by GABP alpha/beta Complex | 3 | 0.268402  | 3.25E-002 |
| 173 | enriched | Imatinib and Chronic Myeloid Leukemia                              | 3 | 0.268402  | 3.25E-002 |
| 174 | enriched | Endoderm Differentiation                                           | 7 | 1.89224   | 3.50E-002 |
| 175 | enriched | NO/cGMP/PKG mediated Neuroprotection                               | 4 | 0.630745  | 4.43E-002 |
| 176 | enriched | Metastatic brain tumor                                             | 2 | 0.0805207 | 4.44E-002 |
| 177 | enriched | EBV LMP1 signaling                                                 | 3 | 0.308663  | 4.53E-002 |
| 178 | enriched | Rett syndrome causing genes                                        | 4 | 0.644165  | 4.67E-002 |
| 179 | enriched | Regulation of Actin Cytoskeleton                                   | 7 | 2.01302   | 4.70E-002 |

**Table S2.2. Reactome Pathways enriched by key network targets of RA-Cold**

| No | Type     | Name                                                                               | Number of hits | Expected score | Adjusted p-value |
|----|----------|------------------------------------------------------------------------------------|----------------|----------------|------------------|
| 1  | enriched | Interferon gamma signaling                                                         | 20             | 1.15413        | 1.15E-014        |
| 2  | enriched | Interleukin-10 signaling                                                           | 17             | 0.630745       | 1.15E-014        |
| 3  | enriched | Interleukin-4 and Interleukin-13 signaling                                         | 21             | 1.44937        | 2.74E-014        |
| 4  | enriched | Chemokine receptors bind chemokines                                                | 17             | 0.791786       | 8.17E-014        |
| 5  | enriched | Generation of second messenger molecules                                           | 12             | 0.442864       | 2.15E-010        |
| 6  | enriched | Phosphorylation of CD3 and TCR zeta chains                                         | 10             | 0.295242       | 2.83E-009        |
| 7  | enriched | PD-1 signaling                                                                     | 10             | 0.308663       | 3.43E-009        |
| 8  | enriched | Downstream TCR signaling                                                           | 15             | 1.31517        | 7.84E-009        |
| 9  | enriched | Translocation of ZAP-70 to Immunological synapse                                   | 9              | 0.254982       | 1.63E-008        |
| 10 | enriched | Immunoregulatory interactions between a Lymphoid and a non-Lymphoid cell           | 15             | 1.77145        | 2.74E-007        |
| 11 | enriched | Neutrophil degranulation                                                           | 26             | 6.44165        | 9.09E-007        |
| 12 | enriched | ER-Phagosome pathway                                                               | 12             | 1.11387        | 9.46E-007        |
| 13 | enriched | Interferon alpha/beta signaling                                                    | 11             | 0.899147       | 1.11E-006        |
| 14 | enriched | Interleukin-7 signaling                                                            | 9              | 0.483124       | 1.11E-006        |
| 15 | enriched | Antigen activates B Cell Receptor (BCR) leading to generation of second messengers | 8              | 0.429444       | 7.33E-006        |
| 16 | enriched | Cell surface interactions at the vascular wall                                     | 11             | 1.18097        | 1.22E-005        |
| 17 | enriched | RHO GTPases Activate NADPH Oxidases                                                | 7              | 0.322083       | 1.89E-005        |
| 18 | enriched | G alpha (i) signalling events                                                      | 17             | 3.51607        | 2.79E-005        |
| 19 | enriched | DAP12 signaling                                                                    | 7              | 0.402603       | 6.17E-005        |
| 20 | enriched | Interleukin-23 signaling                                                           | 5              | 0.120781       | 8.44E-005        |
| 21 | enriched | MyD88:MAL(TIRAP) cascade initiated on plasma membrane                              | 6              | 0.254982       | 8.44E-005        |
| 22 | enriched | TNFR2 non-canonical NF-kB pathway                                                  | 9              | 0.925988       | 9.91E-005        |
| 23 | enriched | MyD88 deficiency (TLR2/4)                                                          | 5              | 0.134201       | 1.11E-004        |
| 24 | enriched | PIP3 activates AKT signaling                                                       | 10             | 1.24807        | 1.13E-004        |

|    |          |                                                                                                           |    |           |           |
|----|----------|-----------------------------------------------------------------------------------------------------------|----|-----------|-----------|
| 25 | enriched | GPVI-mediated activation cascade                                                                          | 7  | 0.469704  | 1.16E-004 |
| 26 | enriched | IRAK4 deficiency (TLR2/4)                                                                                 | 5  | 0.147621  | 1.37E-004 |
| 27 | enriched | Interleukin-6 signaling                                                                                   | 5  | 0.147621  | 1.37E-004 |
| 28 | enriched | Constitutive Signaling by Aberrant PI3K in Cancer                                                         | 9  | 1.00651   | 1.47E-004 |
| 29 | enriched | Interleukin-35 Signalling                                                                                 | 5  | 0.161041  | 1.78E-004 |
| 30 | enriched | PI5P, PP2A and IER3 Regulate PI3K/AKT Signaling                                                           | 10 | 1.38227   | 2.12E-004 |
| 31 | enriched | Dual Incision in GG-NER                                                                                   | 7  | 0.550225  | 2.39E-004 |
| 32 | enriched | Regulation of IFNG signaling                                                                              | 5  | 0.187882  | 2.97E-004 |
| 33 | enriched | Formation of Incision Complex in GG-NER                                                                   | 7  | 0.577065  | 2.98E-004 |
| 34 | enriched | Downstream signal transduction                                                                            | 6  | 0.389183  | 4.27E-004 |
| 35 | enriched | TNFR1-induced NFkappaB signaling pathway                                                                  | 6  | 0.402603  | 4.93E-004 |
| 36 | enriched | TNF receptor superfamily (TNFSF) members mediating non-canonical NF-kB pathway                            | 5  | 0.241562  | 7.31E-004 |
| 37 | enriched | Regulation of TNFR1 signaling                                                                             | 6  | 0.442864  | 7.55E-004 |
| 38 | enriched | Cross-presentation of particulate exogenous antigens (phagosomes)                                         | 4  | 0.107361  | 8.51E-004 |
| 39 | enriched | ROS and RNS production in phagocytes                                                                      | 6  | 0.456284  | 8.51E-004 |
| 40 | enriched | NOD1/2 Signaling Pathway                                                                                  | 6  | 0.483124  | 1.09E-003 |
| 41 | enriched | RUNX3 regulates p14-ARF                                                                                   | 4  | 0.120781  | 1.16E-003 |
| 42 | enriched | Signaling by SCF-KIT                                                                                      | 6  | 0.496544  | 1.19E-003 |
| 43 | enriched | Interleukin-12 signaling                                                                                  | 4  | 0.134201  | 1.49E-003 |
| 44 | enriched | Interleukin-21 signaling                                                                                  | 4  | 0.134201  | 1.49E-003 |
| 45 | enriched | Growth hormone receptor signaling                                                                         | 5  | 0.322083  | 1.93E-003 |
| 46 | enriched | Interleukin-1 signaling                                                                                   | 8  | 1.18097   | 2.18E-003 |
| 47 | enriched | Interleukin-20 family signaling                                                                           | 5  | 0.335503  | 2.20E-003 |
| 48 | enriched | Interleukin-2 signaling                                                                                   | 4  | 0.161041  | 2.39E-003 |
| 49 | enriched | TP53 Regulates Transcription of Caspase Activators and Caspases                                           | 4  | 0.161041  | 2.39E-003 |
| 50 | enriched | Activation of NF-kappaB in B cells                                                                        | 7  | 0.899147  | 2.70E-003 |
| 51 | enriched | Interleukin receptor SHC signaling                                                                        | 5  | 0.362343  | 2.80E-003 |
| 52 | enriched | MHC class II antigen presentation                                                                         | 9  | 1.65067   | 3.08E-003 |
| 53 | enriched | Nonhomologous End-Joining (NHEJ)                                                                          | 7  | 0.925988  | 3.08E-003 |
| 54 | enriched | TNFs bind their physiological receptors                                                                   | 5  | 0.389183  | 3.58E-003 |
| 55 | enriched | The NLRP3 inflammasome                                                                                    | 4  | 0.201302  | 4.39E-003 |
| 56 | enriched | Recruitment and ATM-mediated phosphorylation of repair and signaling proteins at DNA double strand breaks | 7  | 1.01993   | 5.03E-003 |
| 57 | enriched | Signal regulatory protein family interactions                                                             | 4  | 0.214722  | 5.24E-003 |
| 58 | enriched | CLEC7A (Dectin-1) signaling                                                                               | 7  | 1.07361   | 6.54E-003 |
| 59 | enriched | FCERI mediated NF-kB activation                                                                           | 7  | 1.10045   | 7.13E-003 |
| 60 | enriched | RUNX3 Regulates Immune Response and Cell Migration                                                        | 3  | 0.0805207 | 7.13E-003 |
| 61 | enriched | Signaling by cytosolic FGFR1 fusion mutants                                                               | 4  | 0.241562  | 7.13E-003 |
| 62 | enriched | Telomere Extension By Telomerase                                                                          | 3  | 0.0805207 | 7.13E-003 |
| 63 | enriched | G2/M DNA damage checkpoint                                                                                | 7  | 1.12729   | 7.97E-003 |
| 64 | enriched | Regulation of TLR by endogenous ligand                                                                    | 4  | 0.254982  | 8.27E-003 |
| 65 | enriched | Ovarian tumor domain proteases                                                                            | 5  | 0.509964  | 9.33E-003 |
| 66 | enriched | RUNX3 regulates CDKN1A transcription                                                                      | 3  | 0.0939408 | 9.36E-003 |
| 67 | enriched | Regulation of actin dynamics for phagocytic cup formation                                                 | 6  | 0.818627  | 9.36E-003 |
| 68 | enriched | VEGFA-VEGFR2 Pathway                                                                                      | 6  | 0.832047  | 1.00E-002 |
| 69 | enriched | RUNX3 regulates WNT signaling                                                                             | 3  | 0.107361  | 1.23E-002 |

|     |          |                                                                                                  |   |           |           |
|-----|----------|--------------------------------------------------------------------------------------------------|---|-----------|-----------|
| 70  | enriched | Pre-NOTCH Transcription and Translation                                                          | 7 | 1.24807   | 1.28E-002 |
| 71  | enriched | DNA Damage/Telomere Stress Induced Senescence                                                    | 6 | 0.885727  | 1.29E-002 |
| 72  | enriched | Dual incision in TC-NER                                                                          | 6 | 0.885727  | 1.29E-002 |
| 73  | enriched | RAF/MAP kinase cascade                                                                           | 8 | 1.67751   | 1.33E-002 |
| 74  | enriched | Interleukin-9 signaling                                                                          | 3 | 0.120781  | 1.48E-002 |
| 75  | enriched | MAPK1 (ERK2) activation                                                                          | 3 | 0.120781  | 1.48E-002 |
| 76  | enriched | OAS antiviral response                                                                           | 3 | 0.120781  | 1.48E-002 |
| 77  | enriched | RUNX1 regulates transcription of genes involved in differentiation of HSCs                       | 8 | 1.74461   | 1.62E-002 |
| 78  | enriched | Antigen Presentation: Folding, assembly and peptide loading of class I MHC                       | 4 | 0.335503  | 1.69E-002 |
| 79  | enriched | IKK complex recruitment mediated by RIP1                                                         | 4 | 0.335503  | 1.69E-002 |
| 80  | enriched | MAPK3 (ERK1) activation                                                                          | 3 | 0.134201  | 1.78E-002 |
| 81  | enriched | RUNX1 and FOXP3 control the development of regulatory T lymphocytes (Tregs)                      | 3 | 0.134201  | 1.78E-002 |
| 82  | enriched | Resolution of D-loop Structures through Synthesis-Dependent Strand Annealing (SDSA)              | 4 | 0.348923  | 1.86E-002 |
| 83  | enriched | Syndecan interactions                                                                            | 4 | 0.362343  | 2.09E-002 |
| 84  | enriched | Interleukin-27 signaling                                                                         | 3 | 0.147621  | 2.11E-002 |
| 85  | enriched | Signaling by Leptin                                                                              | 3 | 0.147621  | 2.11E-002 |
| 86  | enriched | Stabilization of p53                                                                             | 3 | 0.147621  | 2.11E-002 |
| 87  | enriched | CD28 dependent Vav1 pathway                                                                      | 3 | 0.161041  | 2.56E-002 |
| 88  | enriched | PECAM1 interactions                                                                              | 3 | 0.161041  | 2.56E-002 |
| 89  | enriched | Regulation of TP53 Expression                                                                    | 2 | 0.0268402 | 2.77E-002 |
| 90  | enriched | The IPAF inflammasome                                                                            | 2 | 0.0268402 | 2.77E-002 |
| 91  | enriched | Integrin cell surface interactions                                                               | 6 | 1.14071   | 3.54E-002 |
| 92  | enriched | Interleukin-15 signaling                                                                         | 3 | 0.187882  | 3.59E-002 |
| 93  | enriched | FCERI mediated Ca <sup>2+</sup> mobilization                                                     | 4 | 0.442864  | 3.67E-002 |
| 94  | enriched | IKBKB deficiency causes SCID                                                                     | 2 | 0.0402603 | 4.25E-002 |
| 95  | enriched | IKBKG deficiency causes anhidrotic ectodermal dysplasia with immunodeficiency (EDA-ID) (via TLR) | 2 | 0.0402603 | 4.25E-002 |
| 96  | enriched | Signalling to STAT3                                                                              | 2 | 0.0402603 | 4.25E-002 |
| 97  | enriched | The AIM2 inflammasome                                                                            | 2 | 0.0402603 | 4.25E-002 |
| 98  | enriched | Transcriptional regulation of granulopoiesis                                                     | 6 | 1.20781   | 4.32E-002 |
| 99  | enriched | RIPK1-mediated regulated necrosis                                                                | 3 | 0.214722  | 4.61E-002 |
| 100 | enriched | Regulation of KIT signaling                                                                      | 3 | 0.214722  | 4.61E-002 |
| 101 | enriched | Detoxification of Reactive Oxygen Species                                                        | 4 | 0.496544  | 4.92E-002 |
| 102 | enriched | HDR through Single Strand Annealing (SSA)                                                        | 4 | 0.496544  | 4.92E-002 |

**Table S2.3. KEGG-Pathways enriched by key network targets of RA-Cold**

| No | Type     | Name                                   | Number of hits | Expected score | Adjusted p-value |
|----|----------|----------------------------------------|----------------|----------------|------------------|
| 1  | enriched | Cytokine-cytokine receptor interaction | 42             | 3.95893        | 1.59E-025        |
| 2  | enriched | Epstein-Barr virus infection           | 36             | 2.68402        | 6.11E-025        |
| 3  | enriched | Leishmaniasis                          | 25             | 0.993088       | 1.16E-022        |
| 4  | enriched | Tuberculosis                           | 32             | 2.37536        | 2.72E-022        |
| 5  | enriched | Toxoplasmosis                          | 27             | 1.50305        | 1.60E-021        |
| 6  | enriched | Inflammatory bowel disease (IBD)       | 23             | 0.872307       | 2.11E-021        |
| 7  | enriched | Measles                                | 28             | 1.85198        | 9.63E-021        |
| 8  | enriched | Pathways in cancer                     | 45             | 7.09924        | 6.06E-020        |
| 9  | enriched | Influenza A                            | 29             | 2.268          | 7.68E-020        |

|    |          |                                                               |    |          |           |
|----|----------|---------------------------------------------------------------|----|----------|-----------|
| 10 | enriched | Hematopoietic cell lineage                                    | 24 | 1.28833  | 1.34E-019 |
| 11 | enriched | Osteoclast differentiation                                    | 26 | 1.69093  | 1.57E-019 |
| 12 | enriched | Viral protein interaction with cytokine and cytokine receptor | 24 | 1.34201  | 2.54E-019 |
| 13 | enriched | NF-kappa B signaling pathway                                  | 24 | 1.36885  | 3.50E-019 |
| 14 | enriched | Primary immunodeficiency                                      | 18 | 0.483124 | 5.09E-019 |
| 15 | enriched | Rheumatoid arthritis                                          | 23 | 1.23465  | 6.43E-019 |
| 16 | enriched | NOD-like receptor signaling pathway                           | 28 | 2.41562  | 2.39E-018 |
| 17 | enriched | Chemokine signaling pathway                                   | 28 | 2.5364   | 7.20E-018 |
| 18 | enriched | Th1 and Th2 cell differentiation                              | 22 | 1.23465  | 8.79E-018 |
| 19 | enriched | Th17 cell differentiation                                     | 23 | 1.43595  | 9.55E-018 |
| 20 | enriched | Human T-cell leukemia virus 1 infection                       | 28 | 2.939    | 2.04E-016 |
| 21 | enriched | C-type lectin receptor signaling pathway                      | 21 | 1.39569  | 1.05E-015 |
| 22 | enriched | Toll-like receptor signaling pathway                          | 21 | 1.40911  | 1.19E-015 |
| 23 | enriched | Jak-STAT signaling pathway                                    | 24 | 2.17406  | 2.48E-015 |
| 24 | enriched | Human cytomegalovirus infection                               | 27 | 3.01952  | 2.98E-015 |
| 25 | enriched | Allograft rejection                                           | 15 | 0.496544 | 6.73E-015 |
| 26 | enriched | Chagas disease (American trypanosomiasis)                     | 20 | 1.36885  | 8.36E-015 |
| 27 | enriched | Intestinal immune network for IgA                             | 15 | 0.630745 | 1.15E-013 |
| 28 | enriched | Type I diabetes mellitus                                      | 14 | 0.577065 | 7.66E-013 |
| 29 | enriched | Herpes simplex virus 1 infection                              | 34 | 6.57585  | 8.52E-013 |
| 30 | enriched | T cell receptor signaling pathway                             | 18 | 1.38227  | 1.42E-012 |
| 31 | enriched | Human immunodeficiency virus 1 infection                      | 23 | 2.83164  | 3.33E-012 |
| 32 | enriched | Phagosome                                                     | 20 | 2.01302  | 4.77E-012 |
| 33 | enriched | Graft-versus-host disease                                     | 13 | 0.550225 | 7.61E-012 |
| 34 | enriched | Yersinia infection                                            | 18 | 1.61041  | 1.30E-011 |
| 35 | enriched | Viral myocarditis                                             | 14 | 0.791786 | 2.44E-011 |
| 36 | enriched | PD-L1 expression and PD-1 checkpoint pathway in cancer        | 16 | 1.20781  | 2.57E-011 |
| 37 | enriched | B cell receptor signaling pathway                             | 15 | 1.07361  | 6.75E-011 |
| 38 | enriched | Autoimmune thyroid disease                                    | 13 | 0.697846 | 8.60E-011 |
| 39 | enriched | Amoebiasis                                                    | 16 | 1.34201  | 9.95E-011 |
| 40 | enriched | Hepatitis B                                                   | 19 | 2.17406  | 1.25E-010 |
| 41 | enriched | Natural killer cell mediated cytotoxicity                     | 17 | 1.74461  | 3.58E-010 |
| 42 | enriched | African trypanosomiasis                                       | 11 | 0.483124 | 6.22E-010 |
| 43 | enriched | Malaria                                                       | 12 | 0.657585 | 6.61E-010 |
| 44 | enriched | PI3K-Akt signaling pathway                                    | 25 | 4.7373   | 1.31E-009 |
| 45 | enriched | Cell adhesion molecules (CAMs)                                | 17 | 1.94592  | 1.56E-009 |
| 46 | enriched | Asthma                                                        | 10 | 0.402603 | 2.33E-009 |
| 47 | enriched | Legionellosis                                                 | 12 | 0.751526 | 2.33E-009 |
| 48 | enriched | Proteoglycans in cancer                                       | 19 | 2.69744  | 3.21E-009 |
| 49 | enriched | IL-17 signaling pathway                                       | 14 | 1.26149  | 4.36E-009 |
| 50 | enriched | Apoptosis                                                     | 16 | 1.81171  | 4.53E-009 |
| 51 | enriched | Antigen processing and presentation                           | 13 | 1.03335  | 4.78E-009 |
| 52 | enriched | Pertussis                                                     | 13 | 1.04677  | 5.41E-009 |
| 53 | enriched | Kaposi sarcoma-associated herpesvirus infection               | 18 | 2.49614  | 6.39E-009 |
| 54 | enriched | Necroptosis                                                   | 17 | 2.18748  | 6.91E-009 |
| 55 | enriched | AGE-RAGE signaling pathway in diabetic complications          | 14 | 1.34201  | 8.10E-009 |
| 56 | enriched | Systemic lupus erythematosus                                  | 15 | 1.78487  | 2.84E-008 |
| 57 | enriched | TNF signaling pathway                                         | 14 | 1.50305  | 2.99E-008 |
| 58 | enriched | Pancreatic cancer                                             | 12 | 1.00651  | 3.68E-008 |
| 59 | enriched | Chronic myeloid leukemia                                      | 12 | 1.01993  | 4.05E-008 |
| 60 | enriched | Human papillomavirus infection                                | 22 | 4.41522  | 4.05E-008 |

|     |          |                                                           |          |                |           |
|-----|----------|-----------------------------------------------------------|----------|----------------|-----------|
| 61  | enriched | Staphylococcus aureus infection                           | 13       | 1.27491        | 4.05E-008 |
| 62  | enriched | Hepatitis C                                               | 15       | 2.08012        | 1.75E-007 |
| 63  | enriched | MicroRNAs in cancer                                       | 15       | 2.16064        | 2.75E-007 |
| 64  | enriched | Fluid shear stress and atherosclerosis                    | 14       | 1.85198        | 3.09E-007 |
| 65  | enriched | Leukocyte transendothelial migration                      | 12       | 1.50305        | 1.91E-006 |
| 66  | enriched | Prolactin signaling pathway                               | 10       | 0.939408       | 1.98E-006 |
| 67  | enriched | Pathogenic Escherichia coli infection                     | 15       | 2.69744        | 3.92E-006 |
| 68  | enriched | Breast cancer                                             | 13       | 1.97276        | 4.20E-006 |
| 69  | enriched | Platelet activation                                       | 12       | 1.66409        | 4.98E-006 |
| 70  | enriched | Salmonella infection                                      | 10       | 1.07361        | 5.77E-006 |
| 71  | enriched | Cytosolic DNA-sensing pathway                             | 9        | 0.845467       | 7.88E-006 |
| 72  | enriched | Parathyroid hormone synthesis, secretion and action       | 11       | 1.42253        | 7.88E-006 |
| 73  | enriched | Transcriptional misregulation in cancer                   | 14       | 2.48272        | 7.88E-006 |
| 74  | enriched | FoxO signaling pathway                                    | 12       | 1.75803        | 8.02E-006 |
| 75  | enriched | Nucleotide excision repair                                | 8        | 0.630745       | 1.03E-005 |
| 76  | enriched | MAPK signaling pathway                                    | 17       | 3.94551        | 1.59E-005 |
| 77  | enriched | Focal adhesion                                            | 14       | 2.6706         | 1.68E-005 |
| 78  | enriched | Small cell lung cancer                                    | 10       | 1.23465        | 1.68E-005 |
| 79  | enriched | Gastric cancer                                            | 12       | 1.97276        | 2.34E-005 |
| 80  | enriched | Prostate cancer                                           | 10       | 1.30175        | 2.55E-005 |
| 81  | enriched | Rap1 signaling pathway                                    | 14       | 2.81822        | 2.93E-005 |
| 82  | enriched | Cellular senescence                                       | 12       | 2.14722        | 5.13E-005 |
| 83  | enriched | HIF-1 signaling pathway                                   | 10       | 1.46279        | 6.47E-005 |
| 84  | enriched | Fc gamma R-mediated phagocytosis                          | 9        | 1.23465        | 1.20E-004 |
| 85  | enriched | Melanoma                                                  | 8        | 0.966248       | 1.61E-004 |
| 86  | enriched | p53 signaling pathway                                     | 8        | 0.966248       | 1.61E-004 |
| 87  | enriched | Platinum drug resistance                                  | 8        | 0.979668       | 1.75E-004 |
| 88  | enriched | Glioma                                                    | 8        | 1.00651        | 2.07E-004 |
| 89  | enriched | EGFR tyrosine kinase inhibitor resistance                 | 8        | 1.06019        | 2.90E-004 |
| 90  | enriched | Ras signaling pathway                                     | 13       | 3.10005        | 3.41E-004 |
| 91  | enriched | Hepatocellular carcinoma                                  | 11       | 2.24116        | 3.72E-004 |
| 92  | enriched | Colorectal cancer                                         | 8        | 1.15413        | 4.93E-004 |
| 93  | enriched | Non-small cell lung cancer                                | 7        | 0.885727       | 7.02E-004 |
| 94  | enriched | Growth hormone synthesis, secretion and action            | 9        | 1.59699        | 7.12E-004 |
| 95  | enriched | Thyroid hormone signaling pathway                         | 9        | 1.59699        | 7.12E-004 |
| 96  | enriched | Acute myeloid leukemia                                    | 7        | 0.899147       | 7.43E-004 |
| 97  | enriched | Adipocytokine signaling pathway                           | 7        | 0.925988       | 8.73E-004 |
| 98  | enriched | RIG-I-like receptor signaling pathway                     | 7        | 0.939408       | 9.40E-004 |
| 99  | enriched | Endocrine resistance                                      | 8        | 1.31517        | 1.08E-003 |
| 100 | enriched | Antifolate resistance                                     | 5        | 0.416023       | 1.35E-003 |
| 101 | enriched | Endocrine and other factor-regulated calcium reabsorption | 6        | 0.711266       | 1.62E-003 |
| 102 | enriched | Thyroid cancer                                            | 5        | 0.496544       | 2.80E-003 |
| 103 | enriched | Sphingolipid signaling pathway                            | <b>8</b> | <b>1.59699</b> | 3.65E-003 |
| 104 | enriched | Cell cycle                                                | 8        | 1.66409        | 4.69E-003 |
| 105 | enriched | Fc epsilon RI signaling pathway                           | 6        | 0.899147       | 5.03E-003 |
| 106 | enriched | Choline metabolism in cancer                              | 7        | 1.31517        | 6.01E-003 |
| 107 | enriched | Viral carcinogenesis                                      | 10       | 2.69744        | 6.34E-003 |
| 108 | enriched | Inflammatory mediator regulation of TRP channels          | 7        | 1.34201        | 6.61E-003 |
| 109 | enriched | Amyotrophic lateral sclerosis (ALS)                       | 5        | 0.671005       | 9.33E-003 |
| 110 | enriched | Regulation of actin cytoskeleton                          | 10       | 2.85848        | 9.45E-003 |
| 111 | enriched | Cholinergic synapse                                       | 7        | 1.51647        | 1.27E-002 |

|     |          |                                                            |   |          |           |
|-----|----------|------------------------------------------------------------|---|----------|-----------|
| 112 | enriched | Non-homologous end-joining                                 | 3 | 0.174461 | 1.29E-002 |
| 113 | enriched | Endometrial cancer                                         | 5 | 0.778366 | 1.65E-002 |
| 114 | enriched | Neurotrophin signaling pathway                             | 7 | 1.59699  | 1.65E-002 |
| 115 | enriched | Calcium signaling pathway                                  | 9 | 2.59008  | 1.71E-002 |
| 116 | enriched | Cushing syndrome                                           | 8 | 2.09354  | 1.72E-002 |
| 117 | enriched | Gap junction                                               | 6 | 1.18097  | 1.72E-002 |
| 118 | enriched | Hypertrophic cardiomyopathy (HCM)                          | 6 | 1.20781  | 1.89E-002 |
| 119 | enriched | Long-term depression                                       | 5 | 0.818627 | 1.95E-002 |
| 120 | enriched | Wnt signaling pathway                                      | 8 | 2.14722  | 1.95E-002 |
| 121 | enriched | Basal cell carcinoma                                       | 5 | 0.845467 | 2.19E-002 |
| 122 | enriched | Dilated cardiomyopathy (DCM)                               | 6 | 1.27491  | 2.37E-002 |
| 123 | enriched | Central carbon metabolism in cancer                        | 5 | 0.925988 | 3.09E-002 |
| 124 | enriched | Melanogenesis                                              | 6 | 1.35543  | 3.09E-002 |
| 125 | enriched | Renal cell carcinoma                                       | 5 | 0.925988 | 3.09E-002 |
| 126 | enriched | Epithelial cell signaling in Helicobacter pylori infection | 5 | 0.939408 | 3.23E-002 |
| 127 | enriched | Signaling pathways regulating pluripotency of stem cells   | 7 | 1.87882  | 3.52E-002 |
| 128 | enriched | Insulin resistance                                         | 6 | 1.44937  | 4.13E-002 |
| 129 | enriched | Type II diabetes mellitus                                  | 4 | 0.617325 | 4.26E-002 |
| 130 | enriched | Phospholipase D signaling pathway                          | 7 | 1.97276  | 4.43E-002 |

**Table S2.4. WikiPathways enriched by key network targets of RA-Hot**

| No | Type     | Name                                                                         | Number of hits | Expected score | Adjusted p-value |
|----|----------|------------------------------------------------------------------------------|----------------|----------------|------------------|
| 1  | enriched | PI3K-Akt Signaling Pathway                                                   | 50             | 8.21654        | 1.61E-019        |
| 2  | enriched | T-Cell antigen Receptor (TCR) Signaling Pathway                              | 30             | 2.17497        | 1.61E-019        |
| 3  | enriched | Allograft Rejection                                                          | 28             | 2.1508         | 1.03E-017        |
| 4  | enriched | Viral Acute Myocarditis                                                      | 27             | 2.02997        | 2.39E-017        |
| 5  | enriched | Sudden Infant Death Syndrome (SIDS) Susceptibility Pathways                  | 32             | 3.79411        | 7.22E-016        |
| 6  | enriched | T-Cell antigen Receptor (TCR) pathway during Staphylococcus aureus infection | 21             | 1.49831        | 1.00E-013        |
| 7  | enriched | Focal Adhesion-PI3K-Akt-mTOR-signaling pathway                               | 37             | 7.32239        | 3.05E-012        |
| 8  | enriched | Regulation of toll-like receptor signaling pathway                           | 26             | 3.35911        | 4.61E-012        |
| 9  | enriched | Spinal Cord Injury                                                           | 24             | 2.80329        | 6.15E-012        |
| 10 | enriched | B Cell Receptor Signaling Pathway                                            | 22             | 2.34413        | 1.33E-011        |
| 11 | enriched | Toll-like Receptor Signaling Pathway                                         | 22             | 2.48913        | 3.48E-011        |
| 12 | enriched | Hepatitis B infection                                                        | 25             | 3.64911        | 1.06E-010        |
| 13 | enriched | Type II interferon signaling (IFNG)                                          | 15             | 0.894153       | 1.06E-010        |
| 14 | enriched | Chemokine signaling pathway                                                  | 25             | 3.96327        | 4.87E-010        |
| 15 | enriched | Interactions between immune cells and microRNAs in tumor microenvironment    | 13             | 0.676656       | 8.33E-010        |
| 16 | enriched | Pancreatic adenocarcinoma pathway                                            | 19             | 2.1508         | 1.03E-009        |
| 17 | enriched | miRNAs involvement in the immune response in sepsis                          | 14             | 0.894153       | 1.03E-009        |
| 18 | enriched | Focal Adhesion                                                               | 26             | 4.78493        | 2.84E-009        |
| 19 | enriched | Apoptosis                                                                    | 18             | 2.02997        | 3.05E-009        |
| 20 | enriched | IL-7 Signaling Pathway                                                       | 12             | 0.604157       | 3.05E-009        |
| 21 | enriched | Cytokines and Inflammatory Response                                          | 12             | 0.628323       | 4.15E-009        |

|    |          |                                                                                |    |          |           |
|----|----------|--------------------------------------------------------------------------------|----|----------|-----------|
| 22 | enriched | Brain-Derived Neurotrophic Factor (BDNF) signaling pathway                     | 22 | 3.47995  | 6.08E-009 |
| 23 | enriched | Hematopoietic Stem Cell Differentiation                                        | 15 | 1.32915  | 6.50E-009 |
| 24 | enriched | Regulatory circuits of the STAT3 signaling pathway                             | 17 | 1.88497  | 6.99E-009 |
| 25 | enriched | Signaling Pathways in Glioblastoma                                             | 17 | 1.98164  | 1.32E-008 |
| 26 | enriched | Small cell lung cancer                                                         | 18 | 2.2958   | 1.33E-008 |
| 27 | enriched | Cancer immunotherapy by PD-1 blockade                                          | 11 | 0.555825 | 1.58E-008 |
| 28 | enriched | IL-2 Signaling Pathway                                                         | 13 | 1.01498  | 2.72E-008 |
| 29 | enriched | Selective expression of chemokine receptors during T-cell polarization         | 11 | 0.700822 | 1.05E-007 |
| 30 | enriched | MAPK Signaling Pathway                                                         | 26 | 5.94491  | 1.23E-007 |
| 31 | enriched | Ebola Virus Pathway on Host                                                    | 19 | 3.11745  | 1.52E-007 |
| 32 | enriched | Fibrin Complement Receptor 3 Signaling Pathway                                 | 12 | 0.990818 | 1.89E-007 |
| 33 | enriched | Nucleotide-binding Oligomerization Domain (NOD) pathway                        | 12 | 0.990818 | 1.89E-007 |
| 34 | enriched | Leptin signaling pathway                                                       | 15 | 1.83664  | 2.12E-007 |
| 35 | enriched | Ras Signaling                                                                  | 22 | 4.4466   | 2.48E-007 |
| 36 | enriched | Photodynamic therapy-induced NF-kB survival signaling                          | 11 | 0.84582  | 4.29E-007 |
| 37 | enriched | Thymic Stromal LymphoPoietin (TSLP) Signaling Pathway                          | 12 | 1.13582  | 6.22E-007 |
| 38 | enriched | Gastrin Signaling Pathway                                                      | 17 | 2.75496  | 7.32E-007 |
| 39 | enriched | Non-small cell lung cancer                                                     | 14 | 1.73997  | 7.32E-007 |
| 40 | enriched | VEGFA-VEGFR2 Signaling Pathway                                                 | 24 | 5.70324  | 7.76E-007 |
| 41 | enriched | Cytosolic DNA-sensing pathway                                                  | 14 | 1.78831  | 9.45E-007 |
| 42 | enriched | Photodynamic therapy-induced AP-1 survival signaling.                          | 12 | 1.20831  | 9.91E-007 |
| 43 | enriched | Inflammatory Response Pathway                                                  | 10 | 0.724989 | 1.10E-006 |
| 44 | enriched | Bladder Cancer                                                                 | 11 | 0.966652 | 1.13E-006 |
| 45 | enriched | Lung fibrosis                                                                  | 13 | 1.52248  | 1.13E-006 |
| 46 | enriched | Hippo-Merlin Signaling Dysregulation                                           | 17 | 2.89995  | 1.21E-006 |
| 47 | enriched | Senescence and Autophagy in Cancer                                             | 16 | 2.53746  | 1.22E-006 |
| 48 | enriched | ErbB Signaling Pathway                                                         | 15 | 2.19913  | 1.29E-006 |
| 49 | enriched | Oncostatin M Signaling Pathway                                                 | 13 | 1.57081  | 1.44E-006 |
| 50 | enriched | Development and heterogeneity of the ILC family                                | 10 | 0.773321 | 1.58E-006 |
| 51 | enriched | Adipogenesis                                                                   | 17 | 3.14162  | 3.12E-006 |
| 52 | enriched | TLR4 Signaling and Tolerance                                                   | 9  | 0.676656 | 6.05E-006 |
| 53 | enriched | Prolactin Signaling Pathway                                                    | 13 | 1.83664  | 6.71E-006 |
| 54 | enriched | IL-5 Signaling Pathway                                                         | 10 | 0.966652 | 8.45E-006 |
| 55 | enriched | Microglia Pathogen Phagocytosis Pathway                                        | 10 | 0.966652 | 8.45E-006 |
| 56 | enriched | Association Between Physico-Chemical Features and Toxicity Associated Pathways | 12 | 1.59498  | 1.06E-005 |
| 57 | enriched | Human Complement System                                                        | 14 | 2.34413  | 1.36E-005 |
| 58 | enriched | DNA Damage Response                                                            | 12 | 1.64331  | 1.36E-005 |
| 59 | enriched | Integrated Cancer Pathway                                                      | 10 | 1.06332  | 1.59E-005 |
| 60 | enriched | Interleukin-11 Signaling Pathway                                               | 10 | 1.06332  | 1.59E-005 |
| 61 | enriched | MicroRNAs in cardiomyocyte hypertrophy                                         | 13 | 2.02997  | 1.59E-005 |
| 62 | enriched | Signal transduction through IL1R                                               | 9  | 0.797488 | 1.59E-005 |
| 63 | enriched | TGF-beta Signaling Pathway                                                     | 16 | 3.18995  | 1.59E-005 |
| 64 | enriched | miRNA regulation of prostate cancer signaling pathways                         | 9  | 0.797488 | 1.59E-005 |

|     |          |                                                                            |    |          |           |
|-----|----------|----------------------------------------------------------------------------|----|----------|-----------|
| 65  | enriched | Non-genomic actions of 1,25 dihydroxyvitamin D3                            | 12 | 1.71581  | 1.81E-005 |
| 66  | enriched | miRNA Regulation of DNA Damage Response                                    | 12 | 1.71581  | 1.81E-005 |
| 67  | enriched | Kit receptor signaling pathway                                             | 11 | 1.42581  | 2.24E-005 |
| 68  | enriched | Chromosomal and microsatellite instability in colorectal cancer            | 12 | 1.76414  | 2.28E-005 |
| 69  | enriched | Arrhythmogenic Right Ventricular Cardiomyopathy                            | 12 | 1.78831  | 2.56E-005 |
| 70  | enriched | Selenium Micronutrient Network                                             | 13 | 2.1508   | 2.56E-005 |
| 71  | enriched | EPO Receptor Signaling                                                     | 8  | 0.628323 | 2.84E-005 |
| 72  | enriched | IL-9 Signaling Pathway                                                     | 7  | 0.410827 | 2.84E-005 |
| 73  | enriched | Serotonin and anxiety                                                      | 7  | 0.410827 | 2.84E-005 |
| 74  | enriched | Hepatitis C and Hepatocellular Carcinoma                                   | 10 | 1.18415  | 3.18E-005 |
| 75  | enriched | Corticotropin-releasing hormone signaling pathway                          | 13 | 2.2233   | 3.34E-005 |
| 76  | enriched | Endometrial cancer                                                         | 11 | 1.52248  | 3.51E-005 |
| 77  | enriched | Vitamin D Receptor Pathway                                                 | 18 | 4.39826  | 3.76E-005 |
| 78  | enriched | DNA Damage Response (only ATM dependent)                                   | 14 | 2.65829  | 3.88E-005 |
| 79  | enriched | Genes involved in male infertility                                         | 16 | 3.52828  | 4.18E-005 |
| 80  | enriched | LTF danger signal response pathway                                         | 7  | 0.459159 | 4.64E-005 |
| 81  | enriched | Overview of nanoparticle effects                                           | 7  | 0.459159 | 4.64E-005 |
| 82  | enriched | AGE/RAGE pathway                                                           | 11 | 1.59498  | 4.88E-005 |
| 83  | enriched | IL-4 Signaling Pathway                                                     | 10 | 1.30498  | 6.15E-005 |
| 84  | enriched | RAC1/PAK1/p38/MMP2 Pathway                                                 | 11 | 1.64331  | 6.17E-005 |
| 85  | enriched | Integrated Breast Cancer Pathway                                           | 16 | 3.67328  | 6.29E-005 |
| 86  | enriched | Cardiac Hypertrophic Response                                              | 10 | 1.32915  | 6.71E-005 |
| 87  | enriched | Folate Metabolism                                                          | 11 | 1.66747  | 6.71E-005 |
| 88  | enriched | IL-1 signaling pathway                                                     | 10 | 1.32915  | 6.71E-005 |
| 89  | enriched | Toll-like Receptor Signaling related to MyD88                              | 8  | 0.749155 | 7.13E-005 |
| 90  | enriched | Nicotine Activity on Dopaminergic Neurons                                  | 7  | 0.507492 | 7.22E-005 |
| 91  | enriched | IL-6 signaling pathway                                                     | 9  | 1.03915  | 7.47E-005 |
| 92  | enriched | Mammary gland development pathway - Pregnancy and lactation (Stage 3 of 4) | 8  | 0.773321 | 8.44E-005 |
| 93  | enriched | ATM Signaling Network in Development and Disease                           | 9  | 1.08748  | 1.01E-004 |
| 94  | enriched | Resistin as a regulator of inflammation                                    | 8  | 0.797488 | 1.01E-004 |
| 95  | enriched | EGF/EGFR Signaling Pathway                                                 | 16 | 3.89077  | 1.11E-004 |
| 96  | enriched | The human immune response to tuberculosis                                  | 7  | 0.555825 | 1.12E-004 |
| 97  | enriched | miRNAs involved in DNA damage response                                     | 6  | 0.362494 | 1.50E-004 |
| 98  | enriched | IL-3 Signaling Pathway                                                     | 9  | 1.18415  | 1.77E-004 |
| 99  | enriched | Amyotrophic lateral sclerosis (ALS)                                        | 8  | 0.894153 | 1.98E-004 |
| 100 | enriched | Nonalcoholic fatty liver disease                                           | 15 | 3.67328  | 2.25E-004 |
| 101 | enriched | Sleep regulation                                                           | 8  | 0.918319 | 2.30E-004 |
| 102 | enriched | Head and Neck Squamous Cell Carcinoma                                      | 10 | 1.59498  | 2.42E-004 |
| 103 | enriched | Human Thyroid Stimulating Hormone (TSH) signaling pathway                  | 10 | 1.59498  | 2.42E-004 |
| 104 | enriched | Breast cancer pathway                                                      | 15 | 3.72161  | 2.45E-004 |
| 105 | enriched | Cells and Molecules involved in local acute inflammatory response          | 6  | 0.410827 | 2.45E-004 |
| 106 | enriched | Role of Altered Glycolysation of MUC1 in Tumour Microenvironment           | 5  | 0.217497 | 2.45E-004 |
| 107 | enriched | PDGF Pathway                                                               | 8  | 0.942485 | 2.57E-004 |

|     |          |                                                                                        |    |          |           |
|-----|----------|----------------------------------------------------------------------------------------|----|----------|-----------|
| 108 | enriched | Integrin-mediated Cell Adhesion                                                        | 12 | 2.4408   | 2.97E-004 |
| 109 | enriched | PDGFR-beta pathway                                                                     | 7  | 0.700822 | 3.57E-004 |
| 110 | enriched | DNA IR-Double Strand Breaks (DSBs) and cellular response via ATM                       | 9  | 1.32915  | 3.60E-004 |
| 111 | enriched | Fas Ligand (FasL) pathway and Stress induction of Heat Shock Proteins (HSP) regulation | 8  | 1.01498  | 3.97E-004 |
| 112 | enriched | Primary Focal Segmental Glomerulosclerosis FSGS                                        | 10 | 1.73997  | 4.41E-004 |
| 113 | enriched | Apoptosis Modulation and Signaling                                                     | 11 | 2.17497  | 5.07E-004 |
| 114 | enriched | IL-10 Anti-inflammatory Signaling Pathway                                              | 5  | 0.289995 | 6.65E-004 |
| 115 | enriched | Aryl Hydrocarbon Receptor Netpath                                                      | 8  | 1.11165  | 6.84E-004 |
| 116 | enriched | miRNA targets in ECM and membrane receptors                                            | 6  | 0.531658 | 7.56E-004 |
| 117 | enriched | Control of immune tolerance by vasoactive intestinal peptide                           | 5  | 0.314162 | 8.73E-004 |
| 118 | enriched | Development of pulmonary dendritic cells and macrophage subsets                        | 5  | 0.314162 | 8.73E-004 |
| 119 | enriched | Estrogen signaling pathway                                                             | 6  | 0.555825 | 9.11E-004 |
| 120 | enriched | Overview of leukocyte-intrinsic Hippo pathway functions                                | 7  | 0.84582  | 9.27E-004 |
| 121 | enriched | Circadian rhythm related genes                                                         | 16 | 4.85742  | 1.09E-003 |
| 122 | enriched | Vitamin B12 Metabolism                                                                 | 8  | 1.20831  | 1.09E-003 |
| 123 | enriched | Alzheimers Disease                                                                     | 10 | 1.98164  | 1.10E-003 |
| 124 | enriched | Fragile X Syndrome                                                                     | 12 | 2.92412  | 1.32E-003 |
| 125 | enriched | Mammary gland development pathway - Embryonic development (Stage 1 of 4)               | 5  | 0.362494 | 1.43E-003 |
| 126 | enriched | Hair Follicle Development: Cytodifferentiation (Part 3 of 3)                           | 10 | 2.10247  | 1.68E-003 |
| 127 | enriched | Interferon type I signaling pathways                                                   | 8  | 1.30498  | 1.71E-003 |
| 128 | enriched | ATM Signaling Pathway                                                                  | 7  | 0.966652 | 1.83E-003 |
| 129 | enriched | RANKL/RANK (Receptor activator of NFkB (ligand)) Signaling Pathway                     | 8  | 1.32915  | 1.89E-003 |
| 130 | enriched | Nanoparticle-mediated activation of receptor signaling                                 | 6  | 0.676656 | 2.14E-003 |
| 131 | enriched | Platelet-mediated interactions with vascular and circulating cells                     | 5  | 0.410827 | 2.22E-003 |
| 132 | enriched | Regulation of Actin Cytoskeleton                                                       | 13 | 3.62494  | 2.22E-003 |
| 133 | enriched | Common Pathways Underlying Drug Addiction                                              | 7  | 1.01498  | 2.31E-003 |
| 134 | enriched | TNF alpha Signaling Pathway                                                            | 10 | 2.2233   | 2.41E-003 |
| 135 | enriched | T-Cell Receptor and Co-stimulatory Signaling                                           | 6  | 0.700822 | 2.43E-003 |
| 136 | enriched | MET in type 1 papillary renal cell carcinoma                                           | 8  | 1.42581  | 2.78E-003 |
| 137 | enriched | Dopaminergic Neurogenesis                                                              | 6  | 0.724989 | 2.82E-003 |
| 138 | enriched | Novel intracellular components of RIG-I-like receptor (RLR) pathway                    | 8  | 1.44998  | 3.04E-003 |
| 139 | enriched | Extracellular vesicles in the crosstalk of cardiac cells                               | 5  | 0.459159 | 3.25E-003 |
| 140 | enriched | TP53 Network                                                                           | 5  | 0.459159 | 3.25E-003 |
| 141 | enriched | Aryl Hydrocarbon Receptor Pathway                                                      | 7  | 1.11165  | 3.61E-003 |
| 142 | enriched | Monoamine Transport                                                                    | 6  | 0.773321 | 3.71E-003 |
| 143 | enriched | DNA IR-damage and cellular response via ATR                                            | 9  | 1.9333   | 3.80E-003 |

|     |          |                                                                               |    |           |           |
|-----|----------|-------------------------------------------------------------------------------|----|-----------|-----------|
| 144 | enriched | Mechanoregulation and pathology of YAP/TAZ via Hippo and non-Hippo mechanisms | 7  | 1.13582   | 3.95E-003 |
| 145 | enriched | NO/cGMP/PKG mediated Neuroprotection                                          | 7  | 1.13582   | 3.95E-003 |
| 146 | enriched | Cell Cycle                                                                    | 11 | 2.89995   | 4.16E-003 |
| 147 | enriched | G1 to S cell cycle control                                                    | 8  | 1.54664   | 4.25E-003 |
| 148 | enriched | Signaling of Hepatocyte Growth Factor Receptor                                | 6  | 0.821654  | 4.75E-003 |
| 149 | enriched | Structural Pathway of Interleukin 1 (IL-1)                                    | 7  | 1.18415   | 4.83E-003 |
| 150 | enriched | Synaptic signaling pathways associated with autism spectrum disorder          | 7  | 1.20831   | 5.36E-003 |
| 151 | enriched | Vitamin D in inflammatory diseases                                            | 5  | 0.531658  | 5.39E-003 |
| 152 | enriched | MicroRNA network associated with chronic lymphocytic leukemia                 | 3  | 0.0966652 | 6.06E-003 |
| 153 | enriched | EBV LMP1 signaling                                                            | 5  | 0.555825  | 6.36E-003 |
| 154 | enriched | Copper homeostasis                                                            | 7  | 1.25665   | 6.43E-003 |
| 155 | enriched | Wnt Signaling Pathway (Netpath)                                               | 7  | 1.25665   | 6.43E-003 |
| 156 | enriched | Apoptosis-related network due to altered Notch3 in ovarian cancer             | 7  | 1.28081   | 7.09E-003 |
| 157 | enriched | Androgen receptor signaling pathway                                           | 9  | 2.17497   | 7.67E-003 |
| 158 | enriched | Mammary gland development pathway - Puberty (Stage 2 of 4)                    | 4  | 0.314162  | 7.67E-003 |
| 159 | enriched | Osteopontin Signaling                                                         | 4  | 0.314162  | 7.67E-003 |
| 160 | enriched | Serotonin and anxiety-related events                                          | 4  | 0.314162  | 7.67E-003 |
| 161 | enriched | ncRNAs involved in STAT3 signaling in hepatocellular carcinoma                | 4  | 0.314162  | 7.67E-003 |
| 162 | enriched | GPCRs, Other                                                                  | 9  | 2.19913   | 8.00E-003 |
| 163 | enriched | Peptide GPCRs                                                                 | 8  | 1.78831   | 9.31E-003 |
| 164 | enriched | GPCRs, Class A Rhodopsin-like                                                 | 16 | 6.18657   | 1.04E-002 |
| 165 | enriched | Insulin Signaling                                                             | 12 | 3.86661   | 1.07E-002 |
| 166 | enriched | TNF related weak inducer of apoptosis (TWEAK) Signaling Pathway               | 6  | 1.01498   | 1.16E-002 |
| 167 | enriched | GPCRs, Class C Metabotropic glutamate, pheromone                              | 4  | 0.362494  | 1.16E-002 |
| 168 | enriched | Notch Signaling Pathway Netpath                                               | 7  | 1.47414   | 1.41E-002 |
| 169 | enriched | Endochondral Ossification                                                     | 7  | 1.54664   | 1.81E-002 |
| 170 | enriched | Simplified Depiction of MYD88 Distinct Input-Output Pathway                   | 4  | 0.434993  | 2.03E-002 |
| 171 | enriched | Prion disease pathway                                                         | 5  | 0.773321  | 2.12E-002 |
| 172 | enriched | Retinoblastoma Gene in Cancer                                                 | 8  | 2.10247   | 2.31E-002 |
| 173 | enriched | Canonical NF-KB pathway                                                       | 3  | 0.19333   | 2.34E-002 |
| 174 | enriched | Hematopoietic Stem Cell Gene Regulation by GABP alpha/beta Complex            | 4  | 0.483326  | 2.78E-002 |
| 175 | enriched | Phosphodiesterases in neuronal function                                       | 6  | 1.25665   | 2.97E-002 |
| 176 | enriched | MECP2 and Associated Rett Syndrome                                            | 7  | 1.71581   | 2.98E-002 |
| 177 | enriched | NLR Proteins                                                                  | 3  | 0.217497  | 2.98E-002 |
| 178 | enriched | Suppression of HMGB1 mediated inflammation by THBD                            | 3  | 0.217497  | 2.98E-002 |
| 179 | enriched | Overview of interferons-mediated signaling pathway                            | 5  | 0.869986  | 3.22E-002 |
| 180 | enriched | Nuclear Receptors Meta-Pathway                                                | 17 | 7.70905   | 3.33E-002 |
| 181 | enriched | TGF-beta Receptor Signaling                                                   | 6  | 1.30498   | 3.41E-002 |
| 182 | enriched | PI3K/AKT/mTOR - VitD3 Signalling                                              | 4  | 0.531658  | 3.56E-002 |
| 183 | enriched | Transcription factor regulation in adipogenesis                               | 4  | 0.531658  | 3.56E-002 |

|     |          |                                                    |   |          |           |
|-----|----------|----------------------------------------------------|---|----------|-----------|
| 184 | enriched | Type II diabetes mellitus                          | 4 | 0.531658 | 3.56E-002 |
| 185 | enriched | IL1 and megakaryocytes in obesity                  | 4 | 0.579991 | 4.63E-002 |
| 186 | enriched | Neural Crest Cell Migration during Development     | 5 | 0.966652 | 4.63E-002 |
| 187 | enriched | Oxidative Damage                                   | 5 | 0.966652 | 4.63E-002 |
| 188 | enriched | miRNA regulation of p53 pathway in prostate cancer | 4 | 0.579991 | 4.63E-002 |

**Table S2.5. Reactome-Pathways enriched by key network targets of RA-Hot**

| No | Type     | Name                                                                                                      | Number of hits | Expected score | Adjusted p-value |
|----|----------|-----------------------------------------------------------------------------------------------------------|----------------|----------------|------------------|
| 1  | enriched | Interleukin-4 and Interleukin-13 signaling                                                                | 31             | 2.60996        | 3.99E-018        |
| 2  | enriched | Interleukin-10 signaling                                                                                  | 19             | 1.13582        | 9.08E-013        |
| 3  | enriched | Highly calcium permeable postsynaptic nicotinic acetylcholine receptors                                   | 11             | 0.289995       | 1.35E-009        |
| 4  | enriched | Interferon gamma signaling                                                                                | 19             | 2.0783         | 4.12E-009        |
| 5  | enriched | G alpha (i) signalling events                                                                             | 30             | 6.33157        | 1.05E-008        |
| 6  | enriched | Generation of second messenger molecules                                                                  | 13             | 0.797488       | 1.71E-008        |
| 7  | enriched | Highly calcium permeable nicotinic acetylcholine receptors                                                | 9              | 0.217497       | 3.71E-008        |
| 8  | enriched | Immunoregulatory interactions between a Lymphoid and a non-Lymphoid cell                                  | 21             | 3.18995        | 3.71E-008        |
| 9  | enriched | Phosphorylation of CD3 and TCR zeta chains                                                                | 11             | 0.531658       | 5.20E-008        |
| 10 | enriched | Chemokine receptors bind chemokines                                                                       | 15             | 1.42581        | 5.49E-008        |
| 11 | enriched | Translocation of ZAP-70 to Immunological synapse                                                          | 10             | 0.459159       | 2.03E-007        |
| 12 | enriched | Downstream TCR signaling                                                                                  | 17             | 2.3683         | 4.88E-007        |
| 13 | enriched | Interaction between L1 and Ankyrins                                                                       | 11             | 0.749155       | 6.57E-007        |
| 14 | enriched | PD-1 signaling                                                                                            | 10             | 0.555825       | 6.79E-007        |
| 15 | enriched | RAF/MAP kinase cascade                                                                                    | 18             | 3.02079        | 1.81E-006        |
| 16 | enriched | Highly sodium permeable acetylcholine nicotinic receptors                                                 | 7              | 0.169164       | 2.48E-006        |
| 17 | enriched | Integrin cell surface interactions                                                                        | 15             | 2.05413        | 2.56E-006        |
| 18 | enriched | DNA Damage/Telomere Stress Induced Senescence                                                             | 13             | 1.59498        | 7.28E-006        |
| 19 | enriched | Interleukin-7 signaling                                                                                   | 10             | 0.869986       | 1.67E-005        |
| 20 | enriched | Cell surface interactions at the vascular wall                                                            | 14             | 2.12663        | 2.10E-005        |
| 21 | enriched | Neutrophil degranulation                                                                                  | 32             | 11.5998        | 1.02E-004        |
| 22 | enriched | Interleukin-23 signaling                                                                                  | 6              | 0.217497       | 1.09E-004        |
| 23 | enriched | Constitutive Signaling by Aberrant PI3K in Cancer                                                         | 12             | 1.81247        | 1.38E-004        |
| 24 | enriched | Recruitment and ATM-mediated phosphorylation of repair and signaling proteins at DNA double strand breaks | 12             | 1.83664        | 1.50E-004        |
| 25 | enriched | Interleukin receptor SHC signaling                                                                        | 8              | 0.65249        | 1.67E-004        |
| 26 | enriched | PIP3 activates AKT signaling                                                                              | 13             | 2.24746        | 1.70E-004        |
| 27 | enriched | Non-integrin membrane-ECM interactions                                                                    | 9              | 0.966652       | 2.37E-004        |
| 28 | enriched | Interferon alpha/beta signaling                                                                           | 11             | 1.61914        | 2.58E-004        |
| 29 | enriched | ER-Phagosome pathway                                                                                      | 12             | 2.0058         | 2.75E-004        |
| 30 | enriched | TNFR1-induced NFKappaB signaling pathway                                                                  | 8              | 0.724989       | 2.75E-004        |
| 31 | enriched | G2/M DNA damage checkpoint                                                                                | 12             | 2.02997        | 2.83E-004        |
| 32 | enriched | NCAM1 interactions                                                                                        | 9              | 1.01498        | 2.83E-004        |
| 33 | enriched | Nonhomologous End-Joining (NHEJ)                                                                          | 11             | 1.66747        | 2.83E-004        |

|    |          |                                                                                        |    |          |           |
|----|----------|----------------------------------------------------------------------------------------|----|----------|-----------|
| 34 | enriched | Antigen activates B Cell Receptor (BCR) leading to generation of second messengers     | 8  | 0.773321 | 3.53E-004 |
| 35 | enriched | PI5P, PP2A and IER3 Regulate PI3K/AKT Signaling                                        | 13 | 2.48913  | 3.53E-004 |
| 36 | enriched | Regulation of TNFR1 signaling                                                          | 8  | 0.797488 | 4.16E-004 |
| 37 | enriched | Phase 0 - rapid depolarisation                                                         | 9  | 1.11165  | 4.73E-004 |
| 38 | enriched | RHO GTPases Activate NADPH Oxidases                                                    | 7  | 0.579991 | 5.66E-004 |
| 39 | enriched | Senescence-Associated Secretory Phenotype (SASP)                                       | 13 | 2.65829  | 6.09E-004 |
| 40 | enriched | Cross-presentation of particulate exogenous antigens (phagosomes)                      | 5  | 0.19333  | 6.76E-004 |
| 41 | enriched | Detoxification of Reactive Oxygen Species                                              | 8  | 0.894153 | 7.59E-004 |
| 42 | enriched | Assembly of collagen fibrils and other multimeric structures                           | 9  | 1.23248  | 8.72E-004 |
| 43 | enriched | RUNX3 regulates p14-ARF                                                                | 5  | 0.217497 | 9.59E-004 |
| 44 | enriched | Interleukin-21 signaling                                                               | 5  | 0.241663 | 1.38E-003 |
| 45 | enriched | Interleukin-1 signaling                                                                | 11 | 2.12663  | 1.67E-003 |
| 46 | enriched | Platelet degranulation                                                                 | 13 | 3.09328  | 2.26E-003 |
| 47 | enriched | ECM proteoglycans                                                                      | 10 | 1.83664  | 2.42E-003 |
| 48 | enriched | Interleukin-2 signaling                                                                | 5  | 0.289995 | 2.42E-003 |
| 49 | enriched | Interleukin-35 Signalling                                                              | 5  | 0.289995 | 2.42E-003 |
| 50 | enriched | RUNX1 regulates transcription of genes involved in differentiation of HSCs             | 13 | 3.14162  | 2.42E-003 |
| 51 | enriched | Paradoxical activation of RAF signaling by kinase inactive BRAF                        | 8  | 1.13582  | 2.70E-003 |
| 52 | enriched | Signaling by moderate kinase activity BRAF mutants                                     | 8  | 1.13582  | 2.70E-003 |
| 53 | enriched | Signaling downstream of RAS mutants                                                    | 8  | 1.13582  | 2.70E-003 |
| 54 | enriched | ROS and RNS production in phagocytes                                                   | 7  | 0.821654 | 2.78E-003 |
| 55 | enriched | Integrin alphaIIb beta3 signaling                                                      | 6  | 0.555825 | 3.12E-003 |
| 56 | enriched | Collagen degradation                                                                   | 9  | 1.54664  | 3.28E-003 |
| 57 | enriched | Estrogen-dependent nuclear events downstream of ESR-membrane signaling                 | 6  | 0.579991 | 3.57E-003 |
| 58 | enriched | Growth hormone receptor signaling                                                      | 6  | 0.579991 | 3.57E-003 |
| 59 | enriched | Signaling by high-kinase activity BRAF mutants                                         | 7  | 0.869986 | 3.57E-003 |
| 60 | enriched | Regulation of IFNG signaling                                                           | 5  | 0.338328 | 3.62E-003 |
| 61 | enriched | Interleukin-20 family signaling                                                        | 6  | 0.604157 | 4.19E-003 |
| 62 | enriched | GRB2:SOS provides linkage to MAPK signaling for Integrins                              | 5  | 0.362494 | 4.37E-003 |
| 63 | enriched | Packaging Of Telomere Ends                                                             | 8  | 1.25665  | 4.37E-003 |
| 64 | enriched | The NLRP3 inflammasome                                                                 | 5  | 0.362494 | 4.37E-003 |
| 65 | enriched | p130Cas linkage to MAPK signaling for integrins                                        | 5  | 0.362494 | 4.37E-003 |
| 66 | enriched | Meiotic recombination                                                                  | 10 | 2.0783   | 4.59E-003 |
| 67 | enriched | RUNX3 regulates CDKN1A transcription                                                   | 4  | 0.169164 | 4.59E-003 |
| 68 | enriched | MAP2K and MAPK activation                                                              | 7  | 0.966652 | 5.38E-003 |
| 69 | enriched | Syndecan interactions                                                                  | 6  | 0.65249  | 5.38E-003 |
| 70 | enriched | Cleavage of the damaged purine                                                         | 8  | 1.35331  | 6.02E-003 |
| 71 | enriched | Recognition and association of DNA glycosylase with site containing an affected purine | 8  | 1.35331  | 6.02E-003 |
| 72 | enriched | Transcriptional regulation of granulopoiesis                                           | 10 | 2.17497  | 6.02E-003 |
| 73 | enriched | TNFs bind their physiological receptors                                                | 6  | 0.700822 | 7.13E-003 |
| 74 | enriched | Formation of Incision Complex in GG-NER                                                | 7  | 1.03915  | 7.40E-003 |

|     |          |                                                                                                  |    |           |           |
|-----|----------|--------------------------------------------------------------------------------------------------|----|-----------|-----------|
| 75  | enriched | Pre-NOTCH Transcription and Translation                                                          | 10 | 2.24746   | 7.40E-003 |
| 76  | enriched | DAP12 signaling                                                                                  | 6  | 0.724989  | 7.95E-003 |
| 77  | enriched | MET activates PTK2 signaling                                                                     | 6  | 0.724989  | 7.95E-003 |
| 78  | enriched | Cyclin D associated events in G1                                                                 | 7  | 1.06332   | 8.02E-003 |
| 79  | enriched | Interleukin-9 signaling                                                                          | 4  | 0.217497  | 8.02E-003 |
| 80  | enriched | Cleavage of the damaged pyrimidine                                                               | 8  | 1.47414   | 9.08E-003 |
| 81  | enriched | Recognition and association of DNA glycosylase with site containing an affected pyrimidine       | 8  | 1.47414   | 9.08E-003 |
| 82  | enriched | Processing of DNA double-strand break ends                                                       | 10 | 2.3683    | 1.00E-002 |
| 83  | enriched | IKBKB deficiency causes SCID                                                                     | 3  | 0.0724989 | 1.01E-002 |
| 84  | enriched | IKBKG deficiency causes anhidrotic ectodermal dysplasia with immunodeficiency (EDA-ID) (via TLR) | 3  | 0.0724989 | 1.01E-002 |
| 85  | enriched | Interleukin-12 signaling                                                                         | 4  | 0.241663  | 1.01E-002 |
| 86  | enriched | RUNX1 and FOXP3 control the development of regulatory T lymphocytes (Tregs)                      | 4  | 0.241663  | 1.01E-002 |
| 87  | enriched | Signal transduction by L1                                                                        | 5  | 0.507492  | 1.23E-002 |
| 88  | enriched | Interleukin-6 signaling                                                                          | 4  | 0.265829  | 1.31E-002 |
| 89  | enriched | Type I hemidesmosome assembly                                                                    | 4  | 0.265829  | 1.31E-002 |
| 90  | enriched | Activation of NF-kappaB in B cells                                                               | 8  | 1.61914   | 1.41E-002 |
| 91  | enriched | Common Pathway of Fibrin Clot Formation                                                          | 5  | 0.531658  | 1.41E-002 |
| 92  | enriched | GPVI-mediated activation cascade                                                                 | 6  | 0.84582   | 1.41E-002 |
| 93  | enriched | Signaling by BRAF and RAF fusions                                                                | 8  | 1.61914   | 1.41E-002 |
| 94  | enriched | NOD1/2 Signaling Pathway                                                                         | 6  | 0.869986  | 1.56E-002 |
| 95  | enriched | TP53 Regulates Transcription of Caspase Activators and Caspases                                  | 4  | 0.289995  | 1.60E-002 |
| 96  | enriched | Factors involved in megakaryocyte development and platelet production                            | 10 | 2.63413   | 1.87E-002 |
| 97  | enriched | Gene and protein expression by JAK-STAT signaling after Interleukin-12 stimulation               | 6  | 0.918319  | 1.95E-002 |
| 98  | enriched | Antigen Presentation: Folding, assembly and peptide loading of class I MHC                       | 5  | 0.604157  | 2.15E-002 |
| 99  | enriched | IKK complex recruitment mediated by RIP1                                                         | 5  | 0.604157  | 2.15E-002 |
| 100 | enriched | Role of phospholipids in phagocytosis                                                            | 5  | 0.604157  | 2.15E-002 |
| 101 | enriched | AKT phosphorylates targets in the cytosol                                                        | 4  | 0.338328  | 2.42E-002 |
| 102 | enriched | Interleukin-15 signaling                                                                         | 4  | 0.338328  | 2.42E-002 |
| 103 | enriched | Resolution of D-loop Structures through Synthesis-Dependent Strand Annealing (SDSA)              | 5  | 0.628323  | 2.44E-002 |
| 104 | enriched | Dual Incision in GG-NER                                                                          | 6  | 0.990818  | 2.61E-002 |
| 105 | enriched | RUNX3 Regulates Immune Response and Cell Migration                                               | 3  | 0.144998  | 3.17E-002 |
| 106 | enriched | Telomere Extension By Telomerase                                                                 | 3  | 0.144998  | 3.17E-002 |
| 107 | enriched | Voltage gated Potassium channels                                                                 | 6  | 1.03915   | 3.17E-002 |
| 108 | enriched | Meiotic synapsis                                                                                 | 8  | 1.90914   | 3.29E-002 |
| 109 | enriched | Collagen chain trimerization                                                                     | 6  | 1.06332   | 3.35E-002 |
| 110 | enriched | MAP3K8 (TPL2)-dependent MAPK1/3 activation                                                       | 4  | 0.386661  | 3.35E-002 |
| 111 | enriched | PI3K events in ERBB2 signaling                                                                   | 4  | 0.386661  | 3.35E-002 |
| 112 | enriched | RIPK1-mediated regulated necrosis                                                                | 4  | 0.386661  | 3.35E-002 |
| 113 | enriched | Regulation of actin dynamics for phagocytic cup formation                                        | 7  | 1.47414   | 3.35E-002 |
| 114 | enriched | CLEC7A (Dectin-1) signaling                                                                      | 8  | 1.9333    | 3.36E-002 |
| 115 | enriched | VEGFA-VEGFR2 Pathway                                                                             | 7  | 1.49831   | 3.55E-002 |

|     |          |                                                                                                 |    |          |           |
|-----|----------|-------------------------------------------------------------------------------------------------|----|----------|-----------|
| 116 | enriched | FCERI mediated NF-kB activation                                                                 | 8  | 1.98164  | 3.83E-002 |
| 117 | enriched | GAB1 signalosome                                                                                | 4  | 0.410827 | 3.84E-002 |
| 118 | enriched | MECP2 regulates neuronal receptors and channels                                                 | 4  | 0.410827 | 3.84E-002 |
| 119 | enriched | RIP-mediated NFkB activation via ZBP1                                                           | 4  | 0.410827 | 3.84E-002 |
| 120 | enriched | IkBA variant leads to EDA-ID                                                                    | 3  | 0.169164 | 3.95E-002 |
| 121 | enriched | Regulation of Complement cascade                                                                | 6  | 1.13582  | 4.25E-002 |
| 122 | enriched | DNA methylation                                                                                 | 7  | 1.57081  | 4.30E-002 |
| 123 | enriched | Estrogen-dependent gene expression                                                              | 11 | 3.62494  | 4.38E-002 |
| 124 | enriched | Signaling by cytosolic FGFR1 fusion mutants                                                     | 4  | 0.434993 | 4.38E-002 |
| 125 | enriched | TNF receptor superfamily (TNFSF) members mediating non-canonical NF-kB pathway                  | 4  | 0.434993 | 4.38E-002 |
| 126 | enriched | Cargo recognition for clathrin-mediated endocytosis                                             | 9  | 2.56163  | 4.39E-002 |
| 127 | enriched | NoRC negatively regulates rRNA expression                                                       | 9  | 2.56163  | 4.39E-002 |
| 128 | enriched | Activated PKN1 stimulates transcription of AR (androgen receptor) regulated genes KLK2 and KLK3 | 7  | 1.61914  | 4.81E-002 |
| 129 | enriched | Amyloid fiber formation                                                                         | 9  | 2.60996  | 4.87E-002 |
| 130 | enriched | Interleukin-1 processing                                                                        | 3  | 0.19333  | 4.89E-002 |
| 131 | enriched | MyD88:MAL(TIRAP) cascade initiated on plasma membrane                                           | 4  | 0.459159 | 4.89E-002 |
| 132 | enriched | Platelet homeostasis                                                                            | 3  | 0.19333  | 4.89E-002 |
| 133 | enriched | Regulation of TLR by endogenous ligand                                                          | 4  | 0.459159 | 4.89E-002 |

**Table S2.6. KEGG-Pathways enriched by key network targets of RA-Hot**

| No | Type     | Name                                                   | Number of hits | Expected score | Adjusted p-value |
|----|----------|--------------------------------------------------------|----------------|----------------|------------------|
| 1  | enriched | Pathways in cancer                                     | 66             | 12.784         | 6.24E-023        |
| 2  | enriched | PI3K-Akt signaling pathway                             | 53             | 8.5307         | 1.57E-021        |
| 3  | enriched | Primary immunodeficiency                               | 24             | 0.869986       | 3.86E-021        |
| 4  | enriched | Cytokine-cytokine receptor interaction                 | 48             | 7.12906        | 6.22E-021        |
| 5  | enriched | Epstein-Barr virus infection                           | 40             | 4.83326        | 3.89E-020        |
| 6  | enriched | Hematopoietic cell lineage                             | 30             | 2.31996        | 1.63E-019        |
| 7  | enriched | Human T-cell leukemia virus 1 infection                | 40             | 5.29242        | 5.08E-019        |
| 8  | enriched | Leishmaniasis                                          | 27             | 1.78831        | 5.17E-019        |
| 9  | enriched | Th17 cell differentiation                              | 30             | 2.58579        | 1.46E-018        |
| 10 | enriched | Toxoplasmosis                                          | 30             | 2.70662        | 3.94E-018        |
| 11 | enriched | Neuroactive ligand-receptor interaction                | 46             | 8.26487        | 1.94E-017        |
| 12 | enriched | Influenza A                                            | 33             | 4.0841         | 1.74E-016        |
| 13 | enriched | Th1 and Th2 cell differentiation                       | 26             | 2.2233         | 3.43E-016        |
| 14 | enriched | Jak-STAT signaling pathway                             | 32             | 3.91494        | 3.74E-016        |
| 15 | enriched | Measles                                                | 30             | 3.33495        | 3.74E-016        |
| 16 | enriched | Osteoclast differentiation                             | 29             | 3.04495        | 3.74E-016        |
| 17 | enriched | Inflammatory bowel disease (IBD)                       | 23             | 1.57081        | 3.88E-016        |
| 18 | enriched | NF-kappa B signaling pathway                           | 26             | 2.46496        | 2.12E-015        |
| 19 | enriched | Human papillomavirus infection                         | 42             | 7.95071        | 2.51E-015        |
| 20 | enriched | Human cytomegalovirus infection                        | 35             | 5.43741        | 5.17E-015        |
| 21 | enriched | T cell receptor signaling pathway                      | 25             | 2.48913        | 2.00E-014        |
| 22 | enriched | NOD-like receptor signaling pathway                    | 31             | 4.34993        | 2.39E-014        |
| 23 | enriched | PD-L1 expression and PD-1 checkpoint pathway in cancer | 23             | 2.17497        | 1.11E-013        |
| 24 | enriched | Chagas disease (American trypanosomiasis)              | 24             | 2.46496        | 1.26E-013        |
| 25 | enriched | Human immunodeficiency virus 1 infection               | 32             | 5.09909        | 1.72E-013        |

|    |          |                                                               |    |          |           |
|----|----------|---------------------------------------------------------------|----|----------|-----------|
| 26 | enriched | Yersinia infection                                            | 25 | 2.89995  | 3.45E-013 |
| 27 | enriched | B cell receptor signaling pathway                             | 21 | 1.9333   | 1.03E-012 |
| 28 | enriched | Toll-like receptor signaling pathway                          | 23 | 2.53746  | 1.56E-012 |
| 29 | enriched | Cell adhesion molecules (CAMs)                                | 26 | 3.50411  | 1.98E-012 |
| 30 | enriched | Allograft rejection                                           | 16 | 0.894153 | 2.19E-012 |
| 31 | enriched | Chemokine signaling pathway                                   | 29 | 4.56743  | 2.19E-012 |
| 32 | enriched | Hepatitis B                                                   | 27 | 3.91494  | 2.76E-012 |
| 33 | enriched | Intestinal immune network for IgA                             | 17 | 1.13582  | 3.48E-012 |
| 34 | enriched | Viral protein interaction with cytokine and cytokine receptor | 22 | 2.41663  | 4.35E-012 |
| 35 | enriched | Viral myocarditis                                             | 18 | 1.42581  | 6.82E-012 |
| 36 | enriched | Kaposi sarcoma-associated herpesvirus infection               | 28 | 4.49493  | 7.90E-012 |
| 37 | enriched | Type I diabetes mellitus                                      | 16 | 1.03915  | 1.18E-011 |
| 38 | enriched | Tuberculosis                                                  | 27 | 4.27743  | 1.53E-011 |
| 39 | enriched | MAPK signaling pathway                                        | 34 | 7.10489  | 1.82E-011 |
| 40 | enriched | Focal adhesion                                                | 28 | 4.80909  | 3.12E-011 |
| 41 | enriched | Proteoglycans in cancer                                       | 28 | 4.85742  | 3.78E-011 |
| 42 | enriched | C-type lectin receptor signaling pathway                      | 21 | 2.51329  | 5.43E-011 |
| 43 | enriched | Rheumatoid arthritis                                          | 20 | 2.2233   | 5.55E-011 |
| 44 | enriched | FoxO signaling pathway                                        | 23 | 3.16578  | 5.77E-011 |
| 45 | enriched | Graft-versus-host disease                                     | 15 | 0.990818 | 6.58E-011 |
| 46 | enriched | MicroRNAs in cancer                                           | 25 | 3.89077  | 6.70E-011 |
| 47 | enriched | Natural killer cell mediated cytotoxicity                     | 22 | 3.14162  | 3.13E-010 |
| 48 | enriched | Small cell lung cancer                                        | 19 | 2.2233   | 3.92E-010 |
| 49 | enriched | Pancreatic cancer                                             | 17 | 1.81247  | 1.30E-009 |
| 50 | enriched | AGE-RAGE signaling pathway in diabetic complications          | 19 | 2.41663  | 1.33E-009 |
| 51 | enriched | African trypanosomiasis                                       | 13 | 0.869986 | 2.00E-009 |
| 52 | enriched | Pertussis                                                     | 17 | 1.88497  | 2.10E-009 |
| 53 | enriched | Necroptosis                                                   | 23 | 3.9391   | 2.50E-009 |
| 54 | enriched | Fluid shear stress and atherosclerosis                        | 21 | 3.33495  | 4.61E-009 |
| 55 | enriched | Malaria                                                       | 14 | 1.18415  | 4.61E-009 |
| 56 | enriched | TNF signaling pathway                                         | 19 | 2.70662  | 6.59E-009 |
| 57 | enriched | Autoimmune thyroid disease                                    | 14 | 1.25665  | 8.54E-009 |
| 58 | enriched | Chronic myeloid leukemia                                      | 16 | 1.83664  | 1.06E-008 |
| 59 | enriched | Ras signaling pathway                                         | 26 | 5.58241  | 1.19E-008 |
| 60 | enriched | Systemic lupus erythematosus                                  | 20 | 3.21412  | 1.39E-008 |
| 61 | enriched | Transcriptional misregulation in cancer                       | 23 | 4.47076  | 2.06E-008 |
| 62 | enriched | Cholinergic synapse                                           | 18 | 2.73079  | 4.32E-008 |
| 63 | enriched | Platinum drug resistance                                      | 15 | 1.76414  | 4.60E-008 |
| 64 | enriched | ECM-receptor interaction                                      | 16 | 2.12663  | 6.23E-008 |
| 65 | enriched | Cytosolic DNA-sensing pathway                                 | 14 | 1.52248  | 6.41E-008 |
| 66 | enriched | Apoptosis                                                     | 19 | 3.26245  | 9.07E-008 |
| 67 | enriched | Non-small cell lung cancer                                    | 14 | 1.59498  | 1.05E-007 |
| 68 | enriched | Hepatitis C                                                   | 20 | 3.74577  | 1.32E-007 |
| 69 | enriched | Cellular senescence                                           | 20 | 3.86661  | 2.12E-007 |
| 70 | enriched | Amoebiasis                                                    | 16 | 2.41663  | 2.88E-007 |
| 71 | enriched | Phagosome                                                     | 19 | 3.62494  | 3.96E-007 |
| 72 | enriched | Hypertrophic cardiomyopathy (HCM)                             | 15 | 2.17497  | 4.89E-007 |
| 73 | enriched | Herpes simplex virus 1 infection                              | 35 | 11.8415  | 7.40E-007 |
| 74 | enriched | Calcium signaling pathway                                     | 21 | 4.66409  | 7.65E-007 |
| 75 | enriched | HIF-1 signaling pathway                                       | 16 | 2.63413  | 7.93E-007 |
| 76 | enriched | Staphylococcus aureus infection                               | 15 | 2.2958   | 8.78E-007 |
| 77 | enriched | Prostate cancer                                               | 15 | 2.34413  | 1.11E-006 |

|     |          |                                                            |    |          |           |
|-----|----------|------------------------------------------------------------|----|----------|-----------|
| 78  | enriched | Viral carcinogenesis                                       | 21 | 4.85742  | 1.37E-006 |
| 79  | enriched | Colorectal cancer                                          | 14 | 2.0783   | 1.69E-006 |
| 80  | enriched | Antigen processing and presentation                        | 13 | 1.8608   | 3.26E-006 |
| 81  | enriched | Regulation of actin cytoskeleton                           | 21 | 5.14742  | 3.26E-006 |
| 82  | enriched | cAMP signaling pathway                                     | 21 | 5.21992  | 3.95E-006 |
| 83  | enriched | EGFR tyrosine kinase inhibitor resistance                  | 13 | 1.90914  | 4.14E-006 |
| 84  | enriched | IL-17 signaling pathway                                    | 14 | 2.27163  | 4.23E-006 |
| 85  | enriched | Bladder cancer                                             | 10 | 0.990818 | 4.32E-006 |
| 86  | enriched | Salmonella infection                                       | 13 | 1.9333   | 4.55E-006 |
| 87  | enriched | Dilated cardiomyopathy (DCM)                               | 14 | 2.2958   | 4.59E-006 |
| 88  | enriched | Gastric cancer                                             | 17 | 3.55244  | 5.79E-006 |
| 89  | enriched | Legionellosis                                              | 11 | 1.35331  | 6.94E-006 |
| 90  | enriched | Prolactin signaling pathway                                | 12 | 1.69164  | 7.52E-006 |
| 91  | enriched | ErbB signaling pathway                                     | 13 | 2.05413  | 7.99E-006 |
| 92  | enriched | Rap1 signaling pathway                                     | 20 | 5.07492  | 9.21E-006 |
| 93  | enriched | Prion diseases                                             | 9  | 0.84582  | 1.08E-005 |
| 94  | enriched | Thyroid cancer                                             | 9  | 0.894153 | 1.59E-005 |
| 95  | enriched | Arrhythmogenic right ventricular cardiomyopathy (ARVC)     | 12 | 1.8608   | 1.76E-005 |
| 96  | enriched | Amyotrophic lateral sclerosis (ALS)                        | 10 | 1.20831  | 1.87E-005 |
| 97  | enriched | Acute myeloid leukemia                                     | 11 | 1.61914  | 3.05E-005 |
| 98  | enriched | Endocrine resistance                                       | 13 | 2.3683   | 3.14E-005 |
| 99  | enriched | Asthma                                                     | 8  | 0.724989 | 3.38E-005 |
| 100 | enriched | Pathogenic Escherichia coli infection                      | 18 | 4.85742  | 6.85E-005 |
| 101 | enriched | Glioma                                                     | 11 | 1.81247  | 7.78E-005 |
| 102 | enriched | Fc gamma R-mediated phagocytosis                           | 12 | 2.2233   | 8.66E-005 |
| 103 | enriched | Non-alcoholic fatty liver disease (NAFLD)                  | 15 | 3.52828  | 9.08E-005 |
| 104 | enriched | Leukocyte transendothelial migration                       | 13 | 2.70662  | 1.12E-004 |
| 105 | enriched | Taste transduction                                         | 11 | 2.0058   | 1.78E-004 |
| 106 | enriched | Neurotrophin signaling pathway                             | 13 | 2.87579  | 1.99E-004 |
| 107 | enriched | Adipocytokine signaling pathway                            | 10 | 1.66747  | 2.13E-004 |
| 108 | enriched | Central carbon metabolism in cancer                        | 10 | 1.66747  | 2.13E-004 |
| 109 | enriched | Nicotine addiction                                         | 8  | 0.990818 | 2.25E-004 |
| 110 | enriched | RIG-I-like receptor signaling pathway                      | 10 | 1.69164  | 2.34E-004 |
| 111 | enriched | Alcoholism                                                 | 16 | 4.4466   | 2.81E-004 |
| 112 | enriched | Melanoma                                                   | 10 | 1.73997  | 2.81E-004 |
| 113 | enriched | Platelet activation                                        | 13 | 2.99662  | 2.81E-004 |
| 114 | enriched | p53 signaling pathway                                      | 10 | 1.73997  | 2.81E-004 |
| 115 | enriched | Antifolate resistance                                      | 7  | 0.749155 | 3.19E-004 |
| 116 | enriched | Endometrial cancer                                         | 9  | 1.40164  | 3.24E-004 |
| 117 | enriched | Hepatocellular carcinoma                                   | 15 | 4.03577  | 3.47E-004 |
| 118 | enriched | Cocaine addiction                                          | 8  | 1.18415  | 6.47E-004 |
| 119 | enriched | Growth hormone synthesis, secretion and action             | 12 | 2.87579  | 7.62E-004 |
| 120 | enriched | Sphingolipid signaling pathway                             | 12 | 2.87579  | 7.62E-004 |
| 121 | enriched | Aldosterone-regulated sodium reabsorption                  | 7  | 0.894153 | 8.15E-004 |
| 122 | enriched | Fc epsilon RI signaling pathway                            | 9  | 1.61914  | 8.50E-004 |
| 123 | enriched | Epithelial cell signaling in Helicobacter pylori infection | 9  | 1.69164  | 1.14E-003 |
| 124 | enriched | Breast cancer                                              | 13 | 3.55244  | 1.27E-003 |
| 125 | enriched | Serotonergic synapse                                       | 11 | 2.77912  | 2.24E-003 |
| 126 | enriched | Estrogen signaling pathway                                 | 12 | 3.33495  | 2.62E-003 |
| 127 | enriched | Type II diabetes mellitus                                  | 7  | 1.11165  | 2.62E-003 |
| 128 | enriched | Complement and coagulation cascades                        | 9  | 1.9333   | 2.76E-003 |
| 129 | enriched | Thyroid hormone signaling pathway                          | 11 | 2.87579  | 2.86E-003 |

|     |          |                                                          |    |         |           |
|-----|----------|----------------------------------------------------------|----|---------|-----------|
| 130 | enriched | Nucleotide excision repair                               | 7  | 1.13582 | 2.86E-003 |
| 131 | enriched | Inflammatory mediator regulation of TRP channels         | 10 | 2.41663 | 2.98E-003 |
| 132 | enriched | GnRH secretion                                           | 8  | 1.54664 | 3.08E-003 |
| 133 | enriched | Alzheimer disease                                        | 13 | 4.03577 | 3.80E-003 |
| 134 | enriched | Cell cycle                                               | 11 | 2.99662 | 3.80E-003 |
| 135 | enriched | Huntington disease                                       | 14 | 4.59159 | 3.80E-003 |
| 136 | enriched | Phospholipase D signaling pathway                        | 12 | 3.55244 | 4.17E-003 |
| 137 | enriched | Oxytocin signaling pathway                               | 12 | 3.69744 | 5.78E-003 |
| 138 | enriched | Cushing syndrome                                         | 12 | 3.76994 | 6.74E-003 |
| 139 | enriched | Glutamatergic synapse                                    | 10 | 2.73079 | 6.86E-003 |
| 140 | enriched | VEGF signaling pathway                                   | 7  | 1.42581 | 9.16E-003 |
| 141 | enriched | Choline metabolism in cancer                             | 9  | 2.3683  | 9.74E-003 |
| 142 | enriched | Long-term potentiation                                   | 7  | 1.61914 | 1.78E-002 |
| 143 | enriched | Insulin resistance                                       | 9  | 2.60996 | 1.80E-002 |
| 144 | enriched | Amphetamine addiction                                    | 7  | 1.64331 | 1.89E-002 |
| 145 | enriched | Renal cell carcinoma                                     | 7  | 1.66747 | 2.03E-002 |
| 146 | enriched | Signaling pathways regulating pluripotency of stem cells | 10 | 3.38328 | 2.91E-002 |
| 147 | enriched | Protein digestion and absorption                         | 8  | 2.2958  | 2.91E-002 |
| 148 | enriched | Long-term depression                                     | 6  | 1.47414 | 4.70E-002 |
