# Supplementary material for: Integrative network fusion-based multi-omics study for biomarker identification and patient classification of rheumatoid arthritis
Source: PubMed Central journal article supplement (PMC10158004; doi:10.1186/s13020-023-00750-8), 2023-05-04
Supplement: 13020_2023_750_MOESM3_ESM.pdf [file 13020_2023_750_MOESM3_ESM.pdf]

**Table S3. Differential metabolites of serum and synovial fluid samples from RA-Cold and RA-Hot patients detected by GC/MS**

| Groups            | Sample Type          | Metabolite Name      | CAS NO.   | Formula                                        | Exact mass | Structure                                                                           | Concentration (matrice) |             |             |
|-------------------|----------------------|----------------------|-----------|------------------------------------------------|------------|-------------------------------------------------------------------------------------|-------------------------|-------------|-------------|
|                   |                      |                      |           |                                                |            |                                                                                     | Normal                  | Cold-RA     | Hot-RA      |
| Normal vs RA-hot  | Serum                | Acetohydroxamic acid | 546-88-3  | C <sub>2</sub> H <sub>3</sub> NO <sub>2</sub>  | 75.032     |    | 1006095.33              | 1005162.63  | 993834.75   |
| Normal vs RA-hot  | Serum                | Alpha tocophereol    | 1959/2/9  | C <sub>29</sub> H <sub>50</sub> O <sub>2</sub> | 430.72     |    | 52803                   | 83831.5     | 65121.25    |
| Normal vs RA-hot  | Serum                | Beta-alanine         | 107-95-9  | C <sub>3</sub> H <sub>7</sub> NO <sub>2</sub>  | 89.0477    |    | 74753                   | 78244.88    | 55264.17    |
| Normal vs RA-hot  | Synovial fluid       | Cholesterol          | 57-88-5   | C <sub>27</sub> H <sub>46</sub> O              | 386.355    |    | 4692091.11              | 0           | 5378448.72  |
| Normal vs RA-hot  | Synovial fluid       | D (+)altrose         | 1990-29-0 | C <sub>6</sub> H <sub>12</sub> O <sub>6</sub>  | 180.063    |    | 32289778.18             | 29992401.63 | 25658031.13 |
| Normal vs RA-hot  | Synovial fluid       | D-allose             | 2595-97-3 | C <sub>6</sub> H <sub>12</sub> O <sub>6</sub>  | 180.063    |    | 2259120.53              | 1840082.95  | 1376830.33  |
| Normal vs RA-hot  | Serum                | DL-isoleucine        | 443-79-8  | C <sub>6</sub> H <sub>13</sub> NO              | 131.095    |    | 65812.33                | 102672.13   | 137339      |
| Normal vs RA-hot  | Synovial fluid/Serum | L-(+) lactic acid    | 79-33-4   | C <sub>3</sub> H <sub>6</sub> O <sub>3</sub>   | 90.0317    |    | 13368294.82             | 19850532.19 | 23661202.27 |
| Normal vs RA-hot  | Serum                | L-alanine            | 56-41-7   | C <sub>3</sub> H <sub>7</sub> NO <sub>2</sub>  | 89.0477    |    | 833952.33               | 916189.63   | 926338.92   |
| Normal vs RA-hot  | Synovial fluid       | Palmitic acid        | 1957/10/3 | C <sub>16</sub> H <sub>32</sub> O <sub>2</sub> | 256.24     |   | 5417091.69              | 5216692.15  | 4764318.79  |
| Normal vs RA-cold | Synovial fluid       | Cholesterol          | 57-88-5   | C <sub>27</sub> H <sub>46</sub> O              | 386.355    |  | 4692091.11              | 0           | 5378448.72  |
| Normal vs RA-cold | Synovial fluid/Serum | D (+)altrose         | 1990-29-0 | C <sub>6</sub> H <sub>12</sub> O <sub>6</sub>  | 180.063    |  | 32289778.18             | 29992401.63 | 25658031.13 |
| Normal vs RA-cold | Synovial fluid       | D-allose             | 2595-97-3 | C <sub>6</sub> H <sub>12</sub> O <sub>6</sub>  | 180.063    |  | 2259120.53              | 1840082.95  | 1376830.33  |
| Normal vs RA-cold | Synovial fluid/Serum | L-(+) lactic acid    | 79-33-4   | C <sub>3</sub> H <sub>6</sub> O <sub>3</sub>   | 90.0317    |  | 13368294.82             | 19850532.19 | 23661202.27 |
| Normal vs RA-cold | Synovial fluid       | L-pyroglutamic acid  | 98-79-3   | C <sub>5</sub> H <sub>7</sub> NO <sub>3</sub>  | 129.043    |  | 1648197.4               | 1666824.72  | 1555451.01  |
| Normal vs RA-cold | Synovial fluid/Serum | Oleic acid           | 112-80-1  | C <sub>18</sub> H <sub>34</sub> O <sub>2</sub> | 282.256    |  | 930273.73               | 45755.17    | 22725.21    |
| Normal vs RA-cold | Synovial fluid       | Palmitic acid        | 1957/10/3 | C <sub>16</sub> H <sub>32</sub> O <sub>2</sub> | 256.24     |  | 5417091.69              | 5216692.15  | 4764318.79  |
| Normal vs RA-cold | Synovial fluid/Serum | Psicose              | 551-68-8  | C <sub>6</sub> H <sub>12</sub> O <sub>6</sub>  | 180.063    |  | 99696.56                | 901211.6205 | 230747.72   |
| Normal vs RA-cold | Synovial fluid       | Talose               | 2595-98-4 | C <sub>6</sub> H <sub>12</sub> O <sub>6</sub>  | 180.063    |  | 3628214.333             | 4344456.875 | 2882035.17  |
| RA-Hot vs RA-cold | Synovial fluid/Serum | L-(+) lactic acid    | 79-33-4   | C <sub>3</sub> H <sub>6</sub> O <sub>3</sub>   | 90.0317    |  | 13368294.82             | 19850532.19 | 23661202.27 |
| RA-Hot vs RA-cold | Serum                | Acetohydroxamic acid | 546-88-3  | C <sub>2</sub> H <sub>3</sub> NO <sub>2</sub>  | 75.032     |  | 1006095.33              | 1005162.63  | 993834.75   |
| RA-Hot vs RA-cold | Serum                | Alpha tocophereol    | 1959/2/9  | C <sub>29</sub> H <sub>50</sub> O <sub>2</sub> | 430.72     |  | 52803                   | 83831.5     | 65121.25    |
| RA-Hot vs RA-cold | Serum                | Benzyl alcohol       | 100-51-6  | C <sub>7</sub> H <sub>8</sub> O                | 108.058    |  | /                       | /           | /           |
| RA-Hot vs RA-cold | Serum                | Beta-alanine         | 107-95-9  | C <sub>3</sub> H <sub>7</sub> NO <sub>2</sub>  | 89.0477    |  | 74753                   | 78244.88    | 55264.17    |
| RA-Hot vs RA-cold | Synovial fluid       | Cholesterol          | 57-88-5   | C <sub>27</sub> H <sub>46</sub> O              | 386.355    |  | 4692091.11              | 0           | 5378448.72  |
| RA-Hot vs RA-cold | Synovial fluid       | D (+)altrose         | 1990-29-0 | C <sub>6</sub> H <sub>12</sub> O <sub>6</sub>  | 180.063    |  | 32289778.18             | 29992401.63 | 25658031.13 |

|                   |                |               |           |                   |         |                                                                                    |            |            |            |
|-------------------|----------------|---------------|-----------|-------------------|---------|------------------------------------------------------------------------------------|------------|------------|------------|
| RA-Hot vs RA-cold | Synovial fluid | D-allose      | 2595-97-3 | $C_6H_{12}O_6$    | 180.063 |   | 2259120.53 | 1840082.95 | 1376830.33 |
| RA-Hot vs RA-cold | Serum          | DL-isoleucine | 443-79-8  | $C_6H_{13}NO$     | 131.095 |   | 65812.33   | 102672.13  | 137339     |
| RA-Hot vs RA-cold | Synovial fluid | Palmitic acid | 1957/10/3 | $C_{16}H_{32}O_2$ | 256.24  |  | 5417091.69 | 5216692.15 | 4764318.79 |
| RA-Hot vs RA-cold | Synovial fluid | Stearic acid  | 1957/11/4 | $C_{18}H_{36}O_2$ | 284.272 |  | 2886873.88 | 3002380.67 | 2691662.12 |
| RA-Hot vs RA-cold | Synovial fluid | Talose        | 2595-98-4 | $C_6H_{12}O_6$    | 180.063 |   | 5003009.24 | 4658396.49 | 4355762.05 |
