# Supplementary material for: Integrative network fusion-based multi-omics study for biomarker identification and patient classification of rheumatoid arthritis
Source: PubMed Central journal article supplement (PMC10158004; doi:10.1186/s13020-023-00750-8), 2023-05-04
Supplement: 13020_2023_750_MOESM4_ESM.pdf [file 13020_2023_750_MOESM4_ESM.pdf]

**Table S4.1. Total differential metabolites of serum and synovial fluid samples from RA-Cold and RA-Hot patients detected by LC/MS**

| Sample type    | Groups                                                         | tR(s)   | m/z (Da) | Score | English Name                               | Molecular Formula                                               | CAS No.                  | FC    | P (T test) | VIP   |
|----------------|----------------------------------------------------------------|---------|----------|-------|--------------------------------------------|-----------------------------------------------------------------|--------------------------|-------|------------|-------|
| Serum          | cold vs. normal                                                | 196.510 | 129.057  | 0.980 | 4-Methyl-2-Oxovalerate                     | C <sub>6</sub> H <sub>10</sub> O <sub>3</sub>                   | 4502-00-5                | 1.743 | 0.262      | 1.040 |
| Serum          | cold vs. hot; cold vs. normal; hot vs. normal; RA vs. normal   | 100.580 | 146.985  | 1.000 | 3-Acetyl-1,2-dithiolane                    | C <sub>5</sub> H <sub>8</sub> OS <sub>2</sub>                   | 89712-89-0               | 1.771 | 0.073      | 1.709 |
| Serum          | cold vs. hot; cold vs. normal; cold vs. hot; RA vs. normal     | 299.710 | 213.025  | 0.280 | Clofibrac acid Clofibrac acid (INN) CLOF   | C <sub>10</sub> H <sub>11</sub> ClO <sub>3</sub>                | 882-09-7                 | 1.855 | 0.168      | 1.318 |
| Serum          | cold vs. hot                                                   | 346.820 | 227.131  | 0.060 | Pro-Leu                                    | C <sub>11</sub> H <sub>20</sub> N <sub>2</sub> O <sub>3</sub>   | 52899-07-7               | 1.652 | 0.063      | 1.635 |
| Serum          | RA vs. normal                                                  | 391.840 | 239.062  | 0.440 | Dinoterb 2-tert-butyl-4,6-dinitro-phenol P | C <sub>10</sub> H <sub>12</sub> N <sub>2</sub> O <sub>5</sub>   | 1420-07-1                | 1.572 | 0.138      | 1.047 |
| Serum          | cold vs. hot                                                   | 397.720 | 267.131  | 0.570 | 3-carboxy-4-methyl-5-pentyl-2-furanprop    | C <sub>14</sub> H <sub>20</sub> O <sub>5</sub>                  |                          | 2.477 | 0.076      | 1.594 |
| Serum          | cold vs. hot; RA vs. normal                                    | 636.580 | 371.223  | 0.650 | 5-Ethoxysorgoleone 358                     | C <sub>23</sub> H <sub>32</sub> O <sub>4</sub>                  | 210708-13-               | 0.489 | 0.271      | 1.186 |
| Serum          | cold vs. hot                                                   | 372.000 | 375.197  | 1.000 | Fluoromethalone                            | C <sub>22</sub> H <sub>29</sub> FO <sub>4</sub>                 | 426-13-1                 | 1.753 | 0.322      | 1.007 |
| Serum          | cold vs. hot                                                   | 569.090 | 415.226  | 0.700 | Ramipril (USP/INN) Altace (TN) Ramipr      | C <sub>23</sub> H <sub>32</sub> N <sub>2</sub> O <sub>5</sub>   | 87333-19-5               | 0.716 | 0.060      | 1.648 |
| Serum          | hot vs. normal; RA vs. normal                                  | 582.720 | 417.317  | 0.580 | β-Citraurinenene                           | C <sub>30</sub> H <sub>42</sub> O                               | 58947-97-0               | 1.587 | 0.100      | 1.026 |
| Serum          | cold vs. normal                                                | 614.070 | 479.342  | 0.870 | 24-epi-Brassinolide Brassinolide 2,4-Epit  | C <sub>28</sub> H <sub>48</sub> O <sub>6</sub>                  | 78821-43-9<br>72962-43-7 | 2.169 | 0.141      | 1.299 |
| Serum          | cold vs. normal; hot vs. normal; RA vs. normal                 | 441.980 | 507.277  | 1.000 | LPG 18:2                                   | C <sub>24</sub> H <sub>45</sub> O <sub>9</sub> P                |                          | 1.644 | 0.187      | 1.201 |
| Serum          | cold vs. normal                                                | 862.080 | 572.501  | 1.000 | Cer-NS d37:4 Cer-NS d24:3/13:1 Cer NS      | C <sub>37</sub> H <sub>67</sub> NO <sub>3</sub>                 |                          | 0.543 | 0.344      | 1.150 |
| Serum          | cold vs. normal; hot vs. normal; RA vs. normal                 | 815.730 | 762.516  | 0.380 | Phosphatidylethanolamine 18:2-20:4         | C <sub>43</sub> H <sub>74</sub> NO <sub>8</sub> P               |                          | 1.875 | 0.131      | 1.375 |
| Serum          | cold vs. hot                                                   | 747.090 | 778.595  | 0.920 | Cer-BDS d47:9 Cer_BS d20:2/27:7 Cer I      | C <sub>47</sub> H <sub>77</sub> NO <sub>4</sub>                 |                          | 0.739 | 0.526      | 1.024 |
| Serum          | cold vs. hot; RA vs. normal                                    | 851.460 | 789.618  | 0.210 | Sphingomyelin d18:1-C18:0                  | C <sub>41</sub> H <sub>83</sub> N <sub>2</sub> O <sub>6</sub> P | 54336-69-5               | 1.305 | 0.329      | 1.030 |
| Serum          | cold vs. normal                                                | 848.710 | 790.593  | 0.670 | Cer-BDS d48:10 Cer_BS d21:3/27:7 Cer C     | C <sub>48</sub> H <sub>77</sub> NO <sub>4</sub>                 |                          | 0.507 | 0.314      | 1.002 |
| Serum          | hot vs. normal                                                 | 716.520 | 819.496  | 0.460 | PI 33:2 PI 16:1-17:1 PI(16:1/17:1)         | C <sub>42</sub> H <sub>77</sub> O <sub>13</sub> P               |                          | 1.230 | 0.030      | 1.344 |
| Serum          | cold vs. normal                                                | 887.920 | 819.622  | 0.250 | Phosphatidylcholine alkyl 18:0-22:6        | C <sub>48</sub> H <sub>86</sub> NO <sub>7</sub> P               | 139406-71-               | 0.715 | 0.367      | 1.163 |
| Serum          | cold vs. normal                                                | 752.080 | 835.527  | 0.900 | Roxithromycin                              | C <sub>41</sub> H <sub>76</sub> N <sub>2</sub> O <sub>15</sub>  | 80214-83-1               | 2.210 | 0.139      | 1.293 |
| Serum          | cold vs. hot                                                   | 926.480 | 858.630  | 1.000 | HexCer-AP t39:2 HexCer-AP t20:1/19:1       | C <sub>45</sub> H <sub>85</sub> NO <sub>10</sub>                |                          | 0.204 | 0.272      | 1.082 |
| Serum          | cold vs. normal                                                | 812.940 | 862.561  | 0.920 | Phosphatidylcholine 16:0-22:7              | C <sub>47</sub> H <sub>80</sub> NO <sub>8</sub> P               |                          | 2.598 | 0.017      | 1.978 |
| Serum          | hot vs. normal; RA vs. normal                                  | 471.580 | 870.540  | 0.870 | Phosphatidylglyceride 22:6-22:4            | C <sub>50</sub> H <sub>79</sub> O <sub>10</sub> P               |                          | 1.591 | 0.057      | 1.219 |
| Serum          | cold vs. normal; RA vs. normal                                 | 745.820 | 881.527  | 0.310 | Phosphatidylinositol 18:1-20:5             | C <sub>47</sub> H <sub>79</sub> O <sub>13</sub> P               |                          | 4.555 | 0.011      | 2.018 |
| synovial fluid | cold vs. normal                                                | 350.230 | 329.235  | 0.950 | 9,10,13-TriHOME 9,10,13-Trihydroxyc        | C <sub>18</sub> H <sub>34</sub> O <sub>5</sub>                  | 29907-57-1               | 0.185 | 0.014      | 1.105 |
| synovial fluid | cold vs. hot                                                   | 351.910 | 448.308  | 1.000 | Glycoeoxycholic acid                       | C <sub>26</sub> H <sub>43</sub> NO <sub>5</sub>                 | 360-65-6                 | 0.446 | 0.049      | 1.105 |
| synovial fluid | RA vs. normal                                                  | 352.050 | 464.303  | 0.970 | Glycocholic acid                           | C <sub>26</sub> H <sub>43</sub> NO <sub>6</sub>                 | 475-31-0                 | 2.734 | 0.085      | 1.385 |
| synovial fluid | cold vs. normal; hot vs. normal; RA vs. normal                 | 352.390 | 188.953  | 1.000 | Bromobenzene-3,4-dihydrodiol 4-Bromo-      | C <sub>6</sub> H <sub>7</sub> BrO <sub>2</sub>                  | 82683-93-0               | 0.071 | 0.033      | 1.252 |
| synovial fluid | RA vs. normal                                                  | 352.660 | 465.251  | 0.980 | Androsterone glucuronide Androsterone      | C <sub>25</sub> H <sub>38</sub> O <sub>8</sub>                  | 1852-43-3 32.484         |       | 0.060      | 1.240 |
| synovial fluid | cold vs. hot; cold vs. normal; cold vs. normal; hot vs. normal | 353.930 | 395.190  | 0.960 | 3β-Hydroxypregn-5-en-20-one sulfate Pr     | C <sub>21</sub> H <sub>32</sub> O <sub>5</sub> S                | 1247-64-9                | 0.492 | 0.112      | 1.019 |
| synovial fluid | cold vs. hot; cold vs. normal; cold vs. normal; hot vs. normal | 378.530 | 581.242  | 0.700 | Biliverdin                                 | C <sub>33</sub> H <sub>34</sub> N <sub>4</sub> O <sub>6</sub>   | 114-25-0                 | 0.065 | 0.007      | 1.188 |
| synovial fluid | cold vs. normal                                                | 419.270 | 476.280  | 0.930 | LysoPE(18:2(9Z,12Z)/0:0) PE(18:2(9Z,1      | C <sub>23</sub> H <sub>44</sub> NO <sub>7</sub> P               | 85046-18-0               | 0.462 | 0.017      | 1.137 |

|                |                                                                  |         |         |       |                                           |                                                                   |                  |       |       |       |
|----------------|------------------------------------------------------------------|---------|---------|-------|-------------------------------------------|-------------------------------------------------------------------|------------------|-------|-------|-------|
| synovial fluid | cold vs. normal                                                  | 471.450 | 502.294 | 0.910 | lysoPE 20:3                               | C <sub>25</sub> H <sub>46</sub> NO <sub>7</sub> P                 | 2.079            | 0.004 | 1.323 |       |
| synovial fluid | RA vs. normal                                                    | 472.100 | 522.285 | 0.710 | PS(18:1(9Z)/0:0)                          | C <sub>24</sub> H <sub>46</sub> NO <sub>9</sub> P                 | 2.663            | 0.127 | 1.027 |       |
| synovial fluid | cold vs. normal                                                  | 497.840 | 297.244 | 0.880 | cis-9,10-Epoxystearic acid                | C <sub>18</sub> H <sub>34</sub> O <sub>3</sub>                    | 2443-39-2        | 0.312 | 0.021 | 1.072 |
| synovial fluid | hot vs. normal; RA vs. normal; cold vs. normal; hot vs. normal   | 158.640 | 172.992 | 0.700 | Aryl sulfate Phenol sulfate Phenylsulfate | C <sub>6</sub> H <sub>6</sub> O <sub>4</sub> S                    | 937-34-8         | 2.500 | 0.120 | 1.004 |
| synovial fluid | hot vs. normal; RA vs. normal; cold vs. normal; hot vs. normal   | 526.490 | 295.229 | 1.000 | Vernolic acid(9Z)-(12S,13R)-12,13-Epo-    | C <sub>18</sub> H <sub>32</sub> O <sub>3</sub>                    | 503-07-1         | 0.424 | 0.143 | 1.052 |
| synovial fluid | cold vs. hot                                                     | 165.090 | 212.003 | 0.960 | Indoxyl sulfate                           | C <sub>8</sub> H <sub>7</sub> NO <sub>4</sub> S                   | 2642-37-7        | 2.440 | 0.039 | 1.152 |
| synovial fluid | cold vs. hot                                                     | 178.500 | 263.105 | 0.900 | Phenylacetyl-L-glutamine                  | C <sub>13</sub> H <sub>16</sub> N <sub>2</sub> O <sub>4</sub>     | 28047-15-6       | 3.012 | 0.032 | 1.191 |
| synovial fluid | RA vs. normal                                                    | 563.360 | 490.332 | 0.770 | CerP 25:1                                 | C <sub>25</sub> H <sub>50</sub> NO <sub>6</sub> P                 | 2.064            | 0.075 | 1.074 |       |
| synovial fluid | hot vs. normal; RA vs. normal; cold vs. normal; hot vs. normal   | 565.000 | 297.244 | 0.710 | 3-Oxooctadecanoic acid 3-keto stearic ac  | C <sub>18</sub> H <sub>34</sub> O <sub>3</sub>                    | 0.361            | 0.026 | 1.123 |       |
| synovial fluid | hot vs. normal; RA vs. normal; cold vs. normal; hot vs. normal   | 577.490 | 277.218 | 1.000 | (9Z,11E,13E)-Octadecatrienoic acid(9Z,    | C <sub>18</sub> H <sub>30</sub> O <sub>2</sub>                    | 544-72-9 500.172 | 0.002 | 1.289 |       |
| synovial fluid | cold vs. normal                                                  | 589.040 | 473.284 | 1.000 | Pubescenol                                | C <sub>28</sub> H <sub>42</sub> O <sub>6</sub>                    | 90685-93-1       | 0.389 | 0.012 | 1.208 |
| synovial fluid | cold vs. normal; hot vs. normal; cold vs. normal; hot vs. normal | 594.040 | 253.218 | 1.000 | Hypogeic acid cis-7-Hexadecenoic Acid     | C <sub>16</sub> H <sub>30</sub> O <sub>2</sub>                    | 2416-19-5        | 0.149 | 0.004 | 1.229 |
| synovial fluid | cold vs. normal; hot vs. normal; cold vs. normal; hot vs. normal | 594.980 | 354.296 | 0.630 | Pristanoylglycine                         | C <sub>21</sub> H <sub>41</sub> NO <sub>3</sub>                   | 0.298            | 0.003 | 1.331 |       |
| synovial fluid | hot vs. normal                                                   | 599.220 | 407.154 | 0.660 | Beclomethasone                            | C <sub>22</sub> H <sub>29</sub> ClO <sub>5</sub>                  | 4419-39-0        | 0.290 | 0.004 | 1.099 |
| synovial fluid | RA vs. normal                                                    | 605.000 | 494.361 | 0.970 | lysoPE 20:0 PE(O-20:0/0:0)                | C <sub>25</sub> H <sub>54</sub> NO <sub>6</sub> P                 | 2.097            | 0.075 | 1.139 |       |
| synovial fluid | cold vs. hot                                                     | 216.980 | 187.008 | 0.710 | p-Tolyl Sulfate                           | C <sub>7</sub> H <sub>8</sub> O <sub>4</sub> S                    | 91978-69-7       | 4.715 | 0.033 | 1.188 |
| synovial fluid | cold vs. normal; hot vs. normal; RA vs. normal                   | 613.290 | 380.161 | 0.710 | Azelastine Azelastrine (INN) Optivar (TN  | C <sub>22</sub> H <sub>24</sub> ClN <sub>3</sub> O                | 58581-89-8       | 0.403 | 0.008 | 1.148 |
| synovial fluid | cold vs. normal; hot vs. normal; RA vs. normal                   | 613.310 | 279.234 | 1.000 | β-Linoleic acid                           | C <sub>18</sub> H <sub>32</sub> O <sub>2</sub>                    | 60-33-3          | 0.203 | 0.024 | 1.105 |
| synovial fluid | cold vs. normal; hot vs. normal; RA vs. normal                   | 619.710 | 518.363 | 0.900 | CerP 27:1                                 | C <sub>27</sub> H <sub>54</sub> NO <sub>6</sub> P                 | 2.601            | 0.006 | 1.076 |       |
| synovial fluid | cold vs. normal; hot vs. normal; RA vs. normal                   | 637.280 | 255.234 | 0.610 | Palmitic acid                             | C <sub>16</sub> H <sub>32</sub> O <sub>2</sub>                    | #####            | 0.244 | 0.015 | 1.154 |
| synovial fluid | cold vs. normal; hot vs. normal; RA vs. normal                   | 637.730 | 355.159 | 0.640 | Rutamarin Chalepin acetate                | C <sub>21</sub> H <sub>24</sub> O <sub>5</sub>                    | 14882-94-1       | 0.466 | 0.001 | 1.382 |
| synovial fluid | cold vs. normal; hot vs. normal; RA vs. normal                   | 638.530 | 329.249 | 0.990 | All-cis-4,7,10,13,16-docosapentaenoic ac  | C <sub>22</sub> H <sub>34</sub> O <sub>2</sub>                    | 25182-74-5       | 0.415 | 0.082 | 1.025 |
| synovial fluid | cold vs. normal; hot vs. normal; RA vs. normal                   | 653.880 | 442.091 | 0.810 | N-debutylhalofantrine                     | C <sub>22</sub> H <sub>22</sub> Cl <sub>2</sub> F <sub>3</sub> NO | 0.307            | 0.006 | 1.215 |       |
| synovial fluid | cold vs. normal; hot vs. normal; RA vs. normal                   | 654.580 | 281.250 | 1.000 | trans-9-Octadecenoic acid                 | C <sub>18</sub> H <sub>34</sub> O <sub>2</sub>                    | 112-79-8         | 0.117 | 0.049 | 1.051 |
| synovial fluid | cold vs. normal; hot vs. normal; RA vs. normal                   | 654.610 | 381.175 | 0.640 | Corticosterone 11beta,21-Dihydroxy-4-pi   | C <sub>21</sub> H <sub>30</sub> O <sub>4</sub>                    | 50-22-6          | 0.328 | 0.001 | 1.375 |
| synovial fluid | cold vs. normal; hot vs. normal; RA vs. normal                   | 656.950 | 331.265 | 1.000 | FA 22:4                                   | C <sub>22</sub> H <sub>36</sub> O <sub>2</sub>                    | 0.362            | 0.051 | 1.101 |       |
| synovial fluid | cold vs. normal; hot vs. normal; RA vs. normal                   | 678.160 | 546.395 | 0.940 | CerP 29:1                                 | C <sub>29</sub> H <sub>58</sub> NO <sub>6</sub> P                 | 2.288            | 0.009 | 1.042 |       |
| synovial fluid | RA vs. normal                                                    | 761.150 | 833.522 | 1.000 | PI 34:2                                   | C <sub>43</sub> H <sub>79</sub> O <sub>13</sub> P                 | 0.451            | 0.047 | 1.056 |       |
| synovial fluid | RA vs. normal                                                    | 827.560 | 739.514 | 0.760 | Phosphatidylethanolamine 16:0-20:4 Pho    | C <sub>41</sub> H <sub>74</sub> NO <sub>8</sub> P                 | 0.443            | 0.007 | 1.212 |       |
| synovial fluid | cold vs. normal; RA vs. normal                                   | 829.770 | 580.496 | 0.780 | Cer-NS d34:2; Cer-NS d19:1/15:1           | C <sub>34</sub> H <sub>65</sub> NO <sub>3</sub>                   | 0.363            | 0.045 | 1.069 |       |
| synovial fluid | cold vs. normal                                                  | 844.100 | 774.542 | 0.710 | PE 40:7e PE 18:5e/22:2 EtherPE 40:7e P    | C <sub>45</sub> H <sub>78</sub> NO <sub>7</sub> P                 | 0.403            | 0.017 | 1.109 |       |
| synovial fluid | cold vs. hot                                                     | 294.040 | 383.154 | 0.950 | 19-hydroxy-17-oxoandrost-5-en-3-β-yl st   | C <sub>19</sub> H <sub>28</sub> O <sub>6</sub> S                  | 0.346            | 0.130 | 1.037 |       |
| synovial fluid | cold vs. normal                                                  | 865.780 | 814.597 | 1.000 | HexCer-ADS d37:2 HexCer-ADS d19:0/        | C <sub>43</sub> H <sub>81</sub> NO <sub>9</sub>                   | 0.495            | 0.021 | 1.071 |       |
| synovial fluid | cold vs. normal; RA vs. normal                                   | 868.740 | 736.531 | 0.940 | HexCer-AS d36:4; HexCer-AS d23:3/13:      | C <sub>42</sub> H <sub>75</sub> NO <sub>9</sub>                   | 0.441            | 0.060 | 1.052 |       |

|                |                                                              |         |         |       |                                                                                                      |            |       |       |       |
|----------------|--------------------------------------------------------------|---------|---------|-------|------------------------------------------------------------------------------------------------------|------------|-------|-------|-------|
| synovial fluid | cold vs. normal                                              | 884.030 | 764.584 | 0.940 | Cer-BDS d46:9 Cer_BS d22:3/24:6 Cer[IC <sub>46</sub> H <sub>75</sub> NO <sub>4</sub>                 | 3.051      | 0.020 | 1.082 |       |
| synovial fluid | cold vs. hot                                                 | 887.290 | 700.531 | 0.910 | HexCer-AS d33:1 HexCer-AS d21:1/12:(C <sub>39</sub> H <sub>75</sub> NO <sub>9</sub>                  | 2.666      | 0.059 | 1.061 |       |
| synovial fluid | cold vs. normal; hot vs. normal                              | 890.380 | 776.562 | 0.980 | HexCer-AS d39:5 HexCer-AS d23:3/16:2C <sub>45</sub> H <sub>79</sub> NO <sub>9</sub>                  | 0.364      | 0.017 | 1.115 |       |
| synovial fluid | cold vs. normal                                              | 898.670 | 790.600 | 0.990 | HexCer-ADS d35:0; HexCer-ADS d19:0.C <sub>41</sub> H <sub>81</sub> NO <sub>9</sub>                   | 0.420      | 0.026 | 1.044 |       |
| synovial fluid | cold vs. normal                                              | 899.950 | 838.600 | 0.900 | HexCer-AS d39:4 HexCer-AS d23:2/16:2C <sub>45</sub> H <sub>81</sub> NO <sub>9</sub>                  | 0.342      | 0.028 | 1.094 |       |
| synovial fluid | cold vs. normal                                              | 302.110 | 367.108 | 1.000 | Gibberellic acid C <sub>19</sub> H <sub>22</sub> O <sub>6</sub>                                      | 1977/6/5   | 0.133 | 0.012 | 1.106 |
| synovial fluid | cold vs. normal                                              | 900.930 | 610.543 | 0.850 | Cer 36:1 C <sub>36</sub> H <sub>71</sub> NO <sub>3</sub>                                             | 0.248      | 0.027 | 1.034 |       |
| synovial fluid | cold vs. normal                                              | 905.760 | 814.600 | 1.000 | HexCer-AS d37:2; HexCer-AS d21:2/16:C <sub>43</sub> H <sub>81</sub> NO <sub>9</sub>                  | 0.289      | 0.010 | 1.201 |       |
| synovial fluid | cold vs. hot; cold vs. normal                                | 912.750 | 816.615 | 0.990 | HexCer-AS d37:1 HexCer-AS d21:1/16:(C <sub>43</sub> H <sub>83</sub> NO <sub>9</sub>                  | 2.439      | 0.030 | 1.200 |       |
| synovial fluid | cold vs. normal                                              | 912.760 | 817.645 | 0.810 | SM d39:1 SM d21:0/18:1 SM(d21:0/18:1)C <sub>44</sub> H <sub>89</sub> N <sub>2</sub> O <sub>6</sub> P | 2.303      | 0.005 | 1.238 |       |
| synovial fluid | cold vs. normal                                              | 944.780 | 664.591 | 0.820 | Cer 40:2 C <sub>40</sub> H <sub>77</sub> NO <sub>3</sub>                                             | 0.171      | 0.005 | 1.239 |       |
| synovial fluid | hot vs. normal                                               | 946.510 | 690.607 | 0.780 | Cer 42:3 C <sub>42</sub> H <sub>79</sub> NO <sub>3</sub>                                             | 0.365      | 0.007 | 1.034 |       |
| synovial fluid | cold vs. normal                                              | 953.470 | 856.692 | 0.820 | HexCer-NDS d42:1 HexCer-NDS d18:0/C <sub>48</sub> H <sub>93</sub> NO <sub>8</sub>                    | 0.440      | 0.005 | 1.198 |       |
| synovial fluid | cold vs. hot; cold vs. normal; RA vs. normal; cold vs. hot   | 954.440 | 857.679 | 0.780 | SM d42:2 SM d20:0/22:2 SM(d20:0/22:2)C <sub>47</sub> H <sub>93</sub> N <sub>2</sub> O <sub>6</sub> P | 2.207      | 0.150 | 1.126 |       |
| synovial fluid | cold vs. hot; cold vs. normal; RA vs. normal; cold vs. hot   | 962.670 | 831.663 | 0.770 | SM d40:1 SM d24:1/16:0 SM(d24:1/16:0)C <sub>45</sub> H <sub>91</sub> N <sub>2</sub> O <sub>6</sub> P | 2.906      | 0.072 | 1.206 |       |
| synovial fluid | cold vs. hot; cold vs. normal; RA vs. normal; cold vs. hot   | 306.850 | 332.135 | 0.660 | Pefloxacin (USAN/INN) PFLX Pefloxaci C <sub>17</sub> H <sub>20</sub> FN <sub>3</sub> O <sub>3</sub>  | 70458-92-3 | 0.117 | 0.014 | 1.089 |
| synovial fluid | RA vs. normal                                                | 309.310 | 528.265 | 0.900 | Glycochenodeoxycholate 7-sulfate N-[(3ε C <sub>26</sub> H <sub>43</sub> NO <sub>8</sub> S            | 67030-55-1 | 0.398 | 0.116 | 1.502 |
| synovial fluid | cold vs. hot; cold vs. normal; cold vs. hot; cold vs. normal | 310.270 | 413.201 | 0.950 | Eplerenone Eplerenone (JP17/USAN/INN)C <sub>24</sub> H <sub>30</sub> O <sub>6</sub>                  | 107724-20- | 0.443 | 0.055 | 1.178 |
| synovial fluid | cold vs. hot; cold vs. normal; cold vs. hot; cold vs. normal | 335.710 | 397.207 | 0.960 | Methyl prednisolone acetate C <sub>24</sub> H <sub>32</sub> O <sub>6</sub>                           | 53-36-1    | 0.460 | 0.104 | 1.071 |
| synovial fluid | cold vs. hot                                                 | 283.690 | 359.184 | 0.660 | Prednisone C <sub>21</sub> H <sub>26</sub> O <sub>5</sub>                                            | 1953/3/2   | 2.867 | 0.060 | 1.140 |
| synovial fluid | cold vs. normal; hot vs. normal                              | 346.540 | 359.159 | 0.530 | Matairesinol (-)-Matairesinol (3R,4R)-3,4C <sub>20</sub> H <sub>22</sub> O <sub>6</sub>              | 580-72-3   | 0.135 | 0.015 | 1.083 |
| synovial fluid | hot vs. normal                                               | 348.120 | 236.162 | 1.000 | Stovaine Amylocaine Amylocaine (BAN)C <sub>14</sub> H <sub>21</sub> NO <sub>2</sub>                  | 644-26-8   | 0.414 | 0.003 | 1.132 |
| synovial fluid | cold vs. normal; hot vs. normal; cold vs. hot                | 351.460 | 633.252 | 0.780 | CandesartanCilextil                                                                                  |            | 0.100 | 0.020 | 1.078 |
| synovial fluid | cold vs. normal; hot vs. normal; cold vs. hot                | 355.310 | 585.268 | 0.790 | 4Z,15E-Bilirubin IXa C <sub>33</sub> H <sub>36</sub> N <sub>4</sub> O <sub>6</sub>                   |            | 2.127 | 0.025 | 1.238 |
| synovial fluid | cold vs. normal; hot vs. normal; cold vs. hot                | 355.400 | 586.271 | 0.740 | PS 20:2 PS 3:0-17:2 PS(3:0/17:2) C <sub>26</sub> H <sub>46</sub> NO <sub>10</sub> P                  |            | 2.112 | 0.026 | 1.232 |
| synovial fluid | cold vs. normal; hot vs. normal; cold vs. hot                | 373.530 | 633.253 | 0.780 | CandesartanCilextil                                                                                  |            | 0.099 | 0.011 | 1.124 |
| synovial fluid | cold vs. normal; hot vs. normal; cold vs. hot                | 378.850 | 583.253 | 0.780 | Biliverdin C <sub>33</sub> H <sub>34</sub> N <sub>4</sub> O <sub>6</sub>                             | 114-25-0   | 0.027 | 0.011 | 1.124 |
| synovial fluid | hot vs. normal                                               | 380.800 | 649.247 | 0.600 | Chalcomoracin CHALCOMORACIN C <sub>39</sub> H <sub>36</sub> O <sub>9</sub>                           | 76472-89-4 | 0.126 | 0.006 | 1.032 |
| synovial fluid | cold vs. hot                                                 | 417.080 | 274.273 | 0.670 | Hexadecaphinganine C16 Sphinganine C <sub>16</sub> H <sub>35</sub> NO <sub>2</sub>                   |            | 0.453 | 0.049 | 1.103 |
| synovial fluid | cold vs. hot                                                 | 417.880 | 275.277 | 0.800 | 7,11,15-Trimethyl-3-methylenehexadeca-C <sub>20</sub> H <sub>34</sub>                                |            | 0.484 | 0.047 | 1.124 |
| synovial fluid | RA vs. normal                                                | 486.360 | 440.311 | 0.790 | lysoPE 16:0 PE(O-16:0/0:0) C <sub>21</sub> H <sub>46</sub> NO <sub>6</sub> P                         |            | 2.066 | 0.028 | 1.214 |
| synovial fluid | RA vs. normal                                                | 118.950 | 205.028 | 0.820 | Oxaloglutarate C <sub>7</sub> H <sub>8</sub> O <sub>7</sub>                                          |            | 2.475 | 0.007 | 1.295 |
| synovial fluid | cold vs. hot                                                 | 524.020 | 214.179 | 0.800 | N-(9-Oxodecyl)acetamide C <sub>12</sub> H <sub>23</sub> NO <sub>2</sub>                              |            | 2.480 | 0.019 | 1.289 |
| synovial fluid | cold vs. hot                                                 | 524.290 | 230.174 | 0.900 | 2-(6-hydroxy-6-methylheptyl)-2H-furan-C <sub>12</sub> H <sub>20</sub> O <sub>3</sub>                 |            | 2.430 | 0.022 | 1.264 |
| synovial fluid | RA vs. normal                                                | 524.650 | 490.327 | 0.540 | Oxysporidinone                                                                                       | 184871-55- | 2.001 | 0.051 | 1.189 |

|                |                                                |         |         |       |                                                     |                                                                 |                  |       |       |       |
|----------------|------------------------------------------------|---------|---------|-------|-----------------------------------------------------|-----------------------------------------------------------------|------------------|-------|-------|-------|
| synovial fluid | cold vs. normal; hot vs. normal; RA vs. normal | 532.980 | 278.247 | 0.750 | Obscuraminol A                                      | C <sub>18</sub> H <sub>31</sub> NO                              | 0.310            | 0.083 | 1.177 |       |
| synovial fluid | cold vs. hot                                   | 534.410 | 172.132 | 0.550 | Gabapentin (Neurontin)                              |                                                                 | 60142-96-3       | 2.294 | 0.067 | 1.030 |
| synovial fluid | hot vs. normal                                 | 540.580 | 293.246 | 1.000 | 5 $\alpha$ -Androstane-11 $\beta$ ,17 $\beta$ -diol | C <sub>19</sub> H <sub>32</sub> O <sub>2</sub>                  | 0.079            | 0.007 | 1.034 |       |
| synovial fluid | RA vs. normal                                  | 543.370 | 468.342 | 0.690 | lysoPE 18:0 PE(O-18:0/0:0)                          | C <sub>23</sub> H <sub>50</sub> NO <sub>6</sub> P               | 2.073            | 0.043 | 1.149 |       |
| synovial fluid | hot vs. normal                                 | 547.960 | 636.420 | 0.590 | SM d28:3 SM d14:3/14:0 SM(d14:3/14:0                | C <sub>33</sub> H <sub>63</sub> N <sub>2</sub> O <sub>6</sub> P | 0.393            | 0.004 | 1.056 |       |
| synovial fluid | hot vs. normal                                 | 566.280 | 651.439 | 0.710 | Progesterone                                        |                                                                 | 0.388            | 0.005 | 1.067 |       |
| synovial fluid | hot vs. normal                                 | 566.310 | 650.436 | 0.990 | PC(16:0/9:0(CHO))                                   | C <sub>33</sub> H <sub>64</sub> NO <sub>5</sub> P               | 0.388            | 0.003 | 1.105 |       |
| synovial fluid | hot vs. normal; RA vs. normal                  | 569.700 | 424.340 | 0.870 | $\alpha$ -Tocotrienoxyl radical                     | C <sub>29</sub> H <sub>43</sub> O <sub>2</sub>                  | 0.252            | 0.028 | 1.094 |       |
| synovial fluid | hot vs. normal                                 | 570.990 | 242.283 | 1.000 | 1-Hexadecylamine                                    | C <sub>16</sub> H <sub>35</sub> N                               | 143-27-1         | 2.409 | 0.000 | 1.253 |
| synovial fluid | cold vs. normal                                | 580.100 | 279.230 | 0.710 | Pinolenic Acid Pinolenic acid                       | C <sub>18</sub> H <sub>30</sub> O <sub>2</sub>                  | 16833-54-8       | 0.431 | 0.032 | 1.001 |
| synovial fluid | cold vs. hot                                   | 585.170 | 200.163 | 0.960 | 11-nitro-1-undecene                                 | C <sub>11</sub> H <sub>21</sub> NO <sub>2</sub>                 | 2.086            | 0.065 | 1.054 |       |
| synovial fluid | RA vs. normal                                  | 589.030 | 552.400 | 0.950 | PC(O-18:0/2:0)                                      | C <sub>28</sub> H <sub>58</sub> NO <sub>7</sub> P               | 0.146            | 0.106 | 1.270 |       |
| synovial fluid | RA vs. normal                                  | 595.670 | 400.340 | 0.680 | L-Palmitoylcarnitine Palmitoylcarnitine P           | C <sub>23</sub> H <sub>45</sub> NO <sub>4</sub>                 | 1935-18-8 20.312 | 0.051 | 1.404 |       |
| synovial fluid | RA vs. normal                                  | 598.350 | 401.344 | 0.740 | 7-Ketocholesterol                                   | C <sub>27</sub> H <sub>44</sub> O <sub>2</sub>                  | 566-28-9         | 0.270 | 0.052 | 1.470 |
| synovial fluid | RA vs. normal                                  | 603.020 | 583.252 | 0.660 | Biliverdin                                          | C <sub>33</sub> H <sub>34</sub> N <sub>4</sub> O <sub>6</sub>   | 0.415            | 0.017 | 1.014 |       |
| synovial fluid | cold vs. normal; hot vs. normal                | 612.400 | 263.236 | 1.000 | Farnesyl acetone                                    | C <sub>18</sub> H <sub>30</sub> O                               | 0.337            | 0.003 | 1.254 |       |
| synovial fluid | cold vs. normal; hot vs. normal                | 612.400 | 281.246 | 0.700 | $\beta$ -Linoleic acid                              | C <sub>18</sub> H <sub>32</sub> O <sub>2</sub>                  | 60-33-3          | 0.328 | 0.004 | 1.253 |
| synovial fluid | hot vs. normal                                 | 619.360 | 520.374 | 0.560 | PC(P-19:1(12Z)/0:0)                                 | C <sub>27</sub> H <sub>54</sub> NO <sub>6</sub> P               | 2.916            | 0.007 | 1.067 |       |
| synovial fluid | hot vs. normal                                 | 621.650 | 678.467 | 0.770 | PS(P-16:0/13:0)                                     | C <sub>35</sub> H <sub>68</sub> NO <sub>5</sub> P               | 0.439            | 0.004 | 1.062 |       |
| synovial fluid | hot vs. normal; RA vs. normal; cold vs. normal | 626.960 | 426.356 | 0.790 | MAG 22:3                                            | C <sub>25</sub> H <sub>44</sub> O <sub>4</sub>                  | 0.101            | 0.037 | 1.062 |       |
| synovial fluid | hot vs. normal; RA vs. normal; cold vs. normal | 635.940 | 585.268 | 0.730 | Bilirubin 4E,15Z-Bilirubin IXa                      | C <sub>33</sub> H <sub>36</sub> N <sub>4</sub> O <sub>6</sub>   | 635-65-4 69.054  | 0.026 | 1.053 |       |
| synovial fluid | cold vs. normal                                | 636.030 | 583.252 | 0.970 | Okaramine D                                         |                                                                 | 162413-54-       | 0.095 | 0.014 | 1.107 |
| synovial fluid | RA vs. normal                                  | 134.390 | 208.132 | 0.580 | 3,4-Methylenedioxy-N-ethylamphetamin                | C <sub>12</sub> H <sub>17</sub> NO <sub>2</sub>                 | 14089-52-2       | 9.421 | 0.030 | 1.515 |
| synovial fluid | RA vs. normal                                  | 658.770 | 449.360 | 0.720 | Typhasterol 2-Deoxycastasterone                     | C <sub>28</sub> H <sub>48</sub> O <sub>4</sub>                  | 87734-68-7       | 2.391 | 0.105 | 1.126 |
| synovial fluid | hot vs. normal                                 | 677.300 | 548.405 | 0.610 | CerP 29:1                                           | C <sub>29</sub> H <sub>58</sub> NO <sub>6</sub> P               | 2.835            | 0.002 | 1.155 |       |
| synovial fluid | hot vs. normal                                 | 699.040 | 512.502 | 0.790 | Cer-NDS d32:0 Cer-NDS d15:0/17:0 Cer                | C <sub>32</sub> H <sub>65</sub> NO <sub>3</sub>                 | 0.047            | 0.011 | 1.136 |       |
| synovial fluid | cold vs. hot; hot vs. normal                   | 707.990 | 862.622 | 0.680 | Galabiosylceramide (d18:1/16:0)                     | C <sub>46</sub> H <sub>87</sub> NO <sub>13</sub>                | 2.031            | 0.000 | 1.795 |       |
| synovial fluid | RA vs. normal                                  | 708.430 | 617.472 | 0.940 | SM d28:2 SM d15:2/13:0 SM(d15:2/13:0                | C <sub>33</sub> H <sub>65</sub> N <sub>2</sub> O <sub>6</sub> P | 2.241            | 0.235 | 1.155 |       |
| synovial fluid | cold vs. normal; hot vs. normal; RA vs. normal | 732.590 | 325.309 | 0.830 | 4,8,12,16-Tetramethylheptadecan-4-olide             | C <sub>21</sub> H <sub>40</sub> O <sub>2</sub>                  | 0.327            | 0.038 | 1.050 |       |
| synovial fluid | cold vs. hot                                   | 746.450 | 835.530 | 0.900 | PI(12:0/22:2(13Z,16Z))                              | C <sub>43</sub> H <sub>79</sub> O <sub>13</sub> P               | 2.043            | 0.020 | 1.287 |       |
| synovial fluid | hot vs. normal                                 | 755.960 | 773.614 | 0.680 | PA(21:0/20:1(11Z))                                  | C <sub>44</sub> H <sub>85</sub> O <sub>8</sub> P                | 0.444            | 0.006 | 1.043 |       |
| synovial fluid | cold vs. normal                                | 834.190 | 720.551 | 0.980 | PC(12:0/19:0)                                       | C <sub>39</sub> H <sub>78</sub> NO <sub>8</sub> P               | 2.013            | 0.019 | 1.073 |       |
| synovial fluid | cold vs. hot                                   | 856.110 | 796.582 | 0.970 | PC(17:1(9Z)/20:3(8Z,11Z,14Z))                       | C <sub>45</sub> H <sub>82</sub> NO <sub>8</sub> P               | 2.439            | 0.076 | 1.094 |       |
| synovial fluid | cold vs. normal                                | 861.820 | 431.383 | 0.940 | $\alpha$ -Tocopherol Vitamin E Tocopherol (JP1      | C <sub>29</sub> H <sub>50</sub> O <sub>2</sub>                  | 59-02-9 1012.888 | 0.002 | 1.454 |       |
| synovial fluid | RA vs. normal                                  | 862.030 | 538.517 | 0.980 | Ceramide (18:1/16:0)                                |                                                                 | 0.460            | 0.211 | 1.259 |       |

|                |                                                              |          |         |       |                                                                           |                                                                 |             |       |       |       |
|----------------|--------------------------------------------------------------|----------|---------|-------|---------------------------------------------------------------------------|-----------------------------------------------------------------|-------------|-------|-------|-------|
| synovial fluid | cold vs. hot                                                 | 904.750  | 730.568 | 0.580 | plasmenyl-PE 36:1                                                         | C <sub>41</sub> H <sub>80</sub> NO <sub>7</sub> P               | 2.272       | 0.078 | 1.018 |       |
| synovial fluid | cold vs. normal                                              | 911.490  | 748.609 | 0.710 | DGTS 35:3 DGTS 14:1-21:2 DGTS(14:1                                        | C <sub>45</sub> H <sub>81</sub> NO <sub>7</sub>                 | 2.178       | 0.007 | 1.182 |       |
| synovial fluid | cold vs. hot                                                 | 920.410  | 575.500 | 0.930 | Montecristin                                                              | C <sub>37</sub> H <sub>66</sub> O <sub>4</sub>                  | 185336-15-4 | 1.163 | 0.022 | 1.315 |
| synovial fluid | cold vs. hot; cold vs. normal; hot vs. normal                | 967.810  | 835.663 | 0.880 | SM 42:2                                                                   | C <sub>47</sub> H <sub>93</sub> N <sub>2</sub> O <sub>6</sub> P | 2.315       | 0.024 | 1.470 |       |
| synovial fluid | cold vs. hot; cold vs. normal; hot vs. normal                | 1075.150 | 533.524 | 1.000 | Stearyl linoleate                                                         | C <sub>36</sub> H <sub>68</sub> O <sub>2</sub>                  | 0.126       | 0.001 | 1.384 |       |
| synovial fluid | RA vs. normal                                                | 1090.440 | 815.696 | 1.000 | SM(d18:1/24:0)                                                            | C <sub>47</sub> H <sub>95</sub> N <sub>2</sub> O <sub>6</sub> P | 0.413       | 0.221 | 1.198 |       |
| synovial fluid | cold vs. normal; hot vs. normal                              | 250.780  | 172.133 | 1.000 | Gabapentin (JAN/USAN/INN) Neurontin                                       | C <sub>9</sub> H <sub>17</sub> NO <sub>2</sub>                  | 60142-96-3  | 0.427 | 0.012 | 1.131 |
| Serum          | cold vs. hot; cold vs. normal; hot vs. normal; RA vs. normal | 100.580  | 146.985 | 1.000 | 3-Acetyl-1,2-dithiolane                                                   | C <sub>5</sub> H <sub>8</sub> OS <sub>2</sub>                   | 89712-89-0  | 1.771 | 0.073 | 1.709 |
| Serum          | cold vs. hot                                                 | 747.090  | 778.595 | 0.920 | Cer-BDS d47:9 Cer_BS d20:2/27:7 Cer[                                      | I C <sub>47</sub> H <sub>77</sub> NO <sub>4</sub>               | 0.739       | 0.526 | 1.024 |       |
| Serum          | cold vs. normal                                              | 812.940  | 862.561 | 0.920 | Phosphatidylcholine 16:0-22:7                                             | C <sub>47</sub> H <sub>80</sub> NO <sub>8</sub> P               | 2.598       | 0.017 | 1.978 |       |
| Serum          | cold vs. normal                                              | 752.080  | 835.527 | 0.900 | Roxithromycin                                                             | C <sub>41</sub> H <sub>76</sub> N <sub>2</sub> O <sub>15</sub>  | 80214-83-1  | 2.210 | 0.139 | 1.293 |
| Serum          | hot vs. normal; RA vs. normal                                | 471.580  | 870.540 | 0.870 | Phosphatidylglyceride 22:6-22:4                                           | C <sub>50</sub> H <sub>79</sub> O <sub>10</sub> P               | 1.591       | 0.057 | 1.219 |       |
| Serum          | cold vs. normal                                              | 614.070  | 479.342 | 0.870 | 24-epi-Brassinolide Brassinolide 2,4-Epit                                 | C <sub>28</sub> H <sub>48</sub> O <sub>6</sub>                  | 78821-43-9  | 2.169 | 0.141 | 1.299 |
| Serum          | cold vs. hot                                                 | 372.000  | 375.197 | 1.000 | Fluoromethalone                                                           | C <sub>22</sub> H <sub>29</sub> FO <sub>4</sub>                 | 426-13-1    | 1.753 | 0.322 | 1.007 |
| Serum          | cold vs. hot                                                 | 569.090  | 415.226 | 0.700 | Ramipril (USP/INN) Altace (TN) Ramipr                                     | C <sub>23</sub> H <sub>32</sub> N <sub>2</sub> O <sub>5</sub>   | 87333-19-5  | 0.716 | 0.060 | 1.648 |
| Serum          | cold vs. normal                                              | 848.710  | 790.593 | 0.670 | Cer-BDS d48:10 Cer_BS d21:3/27:7 Cer[                                     | C <sub>48</sub> H <sub>77</sub> NO <sub>4</sub>                 | 0.507       | 0.314 | 1.002 |       |
| Serum          | cold vs. hot; RA vs. normal; hot vs. normal                  | 636.580  | 371.223 | 0.650 | 5-Ethoxysorgoleone 358                                                    | C <sub>23</sub> H <sub>32</sub> O <sub>4</sub>                  | 210708-13-  | 0.489 | 0.271 | 1.186 |
| Serum          | cold vs. hot; RA vs. normal; hot vs. normal                  | 582.720  | 417.317 | 0.580 | β-Citraurinine                                                            | C <sub>30</sub> H <sub>42</sub> O                               | 58947-97-0  | 1.587 | 0.100 | 1.026 |
| Serum          | cold vs. hot                                                 | 397.720  | 267.131 | 0.570 | 3-carboxy-4-methyl-5-pentyl-2-furanpro                                    | C <sub>14</sub> H <sub>20</sub> O <sub>5</sub>                  | 2.477       | 0.076 | 1.594 |       |
| Serum          | cold vs. normal; hot vs. normal; RA vs. normal               | 441.980  | 507.277 | 1.000 | LPG 18:2                                                                  | C <sub>24</sub> H <sub>45</sub> O <sub>9</sub> P                | 1.644       | 0.187 | 1.201 |       |
| Serum          | cold vs. normal                                              | 862.080  | 572.501 | 1.000 | Cer-NS d37:4 Cer-NS d24:3/13:1 Cer[NS                                     | C <sub>37</sub> H <sub>67</sub> NO <sub>3</sub>                 | 0.543       | 0.344 | 1.150 |       |
| Serum          | cold vs. hot                                                 | 926.480  | 858.630 | 1.000 | HexCer-AP t39:2 HexCer-AP t20:1/19:1                                      | C <sub>45</sub> H <sub>85</sub> NO <sub>10</sub>                | 0.204       | 0.272 | 1.082 |       |
| Serum          | cold vs. normal                                              | 196.510  | 129.057 | 0.980 | 4-Methyl-2-Oxovalerate                                                    | C <sub>6</sub> H <sub>10</sub> O <sub>3</sub>                   | 4502-00-5   | 1.743 | 0.262 | 1.040 |
| Serum          | cold vs. hot; hot vs. normal; RA vs. normal; cold vs. normal | 945.690  | 772.618 | 1.000 | PC(P-16:0/20:1(11Z))                                                      | C <sub>44</sub> H <sub>86</sub> NO <sub>7</sub> P               | 0.570       | 0.276 | 1.085 |       |
| Serum          | cold vs. hot; hot vs. normal; RA vs. normal; cold vs. normal | 523.340  | 666.432 | 1.000 | PC(16:0/9:0(COOH))                                                        | C <sub>33</sub> H <sub>64</sub> NO <sub>10</sub> P              | 1.658       | 0.115 | 1.435 |       |
| Serum          | RA vs. normal                                                | 409.450  | 398.240 | 1.000 | S-4-benzyl-3-((S)-3-hydroxy-2,2-dimethyloctanoyl)-5,5-dimethyloxazolidin- | 1.227                                                           | 0.166       | 1.054 |       |       |
| Serum          | cold vs. hot                                                 | 658.670  | 360.317 | 1.000 | 5-Decanoyl-2-nonylpyridine                                                | C <sub>24</sub> H <sub>41</sub> NO                              | 149682-94-  | 0.261 | 0.313 | 1.123 |
| Serum          | cold vs. normal                                              | 859.310  | 788.555 | 1.000 | plasmenyl-PC 36:4                                                         | C <sub>44</sub> H <sub>80</sub> NO <sub>7</sub> P               | 0.528       | 0.227 | 1.213 |       |
| Serum          | cold vs. hot                                                 | 130.310  | 185.128 | 1.000 | N-(3-acetamidopropyl)pyrrolidin-2-one N                                   | C <sub>9</sub> H <sub>16</sub> N <sub>2</sub> O <sub>2</sub>    | 106692-36-  | 1.515 | 0.284 | 1.031 |
| Serum          | cold vs. hot; cold vs. normal; hot vs. normal; RA vs. normal | 86.740   | 175.118 | 0.990 | L-Arginine                                                                | C <sub>6</sub> H <sub>14</sub> N <sub>4</sub> O <sub>2</sub>    | 74-79-3     | 0.708 | 0.261 | 1.121 |
| Serum          | cold vs. hot; cold vs. normal; hot vs. normal; RA vs. normal | 566.510  | 650.437 | 0.990 | PC(16:0/9:0(CHO))                                                         | C <sub>33</sub> H <sub>64</sub> NO <sub>9</sub> P               | 1.428       | 0.122 | 1.426 |       |
| Serum          | cold vs. hot; cold vs. normal; hot vs. normal; RA vs. normal | 516.620  | 496.374 | 0.990 | PC(O-16:0/O-1:0)                                                          | C <sub>25</sub> H <sub>54</sub> NO <sub>6</sub> P               | 1.393       | 0.457 | 1.024 |       |
| Serum          | RA vs. normal                                                | 924.590  | 794.604 | 0.990 | PC(O-18:1(9Z)/20:4(5Z,8Z,11Z,14Z))                                        | C <sub>46</sub> H <sub>84</sub> NO <sub>7</sub> P               | 0.699       | 0.032 | 1.431 |       |
| Serum          | cold vs. normal                                              | 896.470  | 718.573 | 0.990 | PC(P-16:0/16:0)                                                           | C <sub>40</sub> H <sub>80</sub> NO <sub>7</sub> P               | 0.292       | 0.081 | 1.543 |       |

|       |                                                              |          |         |       |                                                                                              |                                                                  |                  |       |       |       |
|-------|--------------------------------------------------------------|----------|---------|-------|----------------------------------------------------------------------------------------------|------------------------------------------------------------------|------------------|-------|-------|-------|
| Serum | hot vs. normal; RA vs. normal                                | 684.690  | 324.325 | 0.990 | N-(14-Methylhexadecanoyl)pyrrolidine                                                         | C <sub>21</sub> H <sub>41</sub> NO                               | 260058-83-1      | 1.342 | 0.117 | 1.071 |
| Serum | cold vs. hot                                                 | 599.310  | 228.231 | 1.000 | N-Tetradecanamide                                                                            | C <sub>14</sub> H <sub>29</sub> NO                               | 638-58-4         | 1.519 | 0.555 | 1.042 |
| Serum | cold vs. normal                                              | 577.720  | 279.231 | 0.990 | $\alpha$ -Linolenic acid                                                                     | C <sub>18</sub> H <sub>30</sub> O <sub>2</sub>                   | 463-40-1         | 2.219 | 0.043 | 1.711 |
| Serum | cold vs. normal                                              | 903.790  | 720.588 | 0.990 | PC(O-18:0/14:0)                                                                              | C <sub>40</sub> H <sub>82</sub> NO <sub>7</sub> P                |                  | 0.591 | 0.248 | 1.114 |
| Serum | cold vs. hot; hot vs. normal; RA vs. normal                  | 606.810  | 538.421 | 0.990 | PC(O-16:0/O-4:0)[U]                                                                          | C <sub>28</sub> H <sub>60</sub> NO <sub>6</sub> P                |                  | 1.411 | 0.348 | 1.111 |
| Serum | cold vs. normal                                              | 122.590  | 132.102 | 0.990 | D-Norleucine                                                                                 | C <sub>6</sub> H <sub>13</sub> NO <sub>2</sub>                   | 327-56-0         | 1.242 | 0.228 | 1.112 |
| Serum | cold vs. normal; hot vs. normal; RA vs. normal; cold vs. hot | 841.510  | 692.557 | 0.990 | PC(o-14:0/16:0) PC(O-14:0/16:0)                                                              | C <sub>38</sub> H <sub>78</sub> NO <sub>7</sub> P                |                  | 0.392 | 0.128 | 1.378 |
| Serum | cold vs. normal; hot vs. normal; RA vs. normal; cold vs. hot | 428.520  | 230.247 | 1.000 | 3-epi-xestoaminol C                                                                          |                                                                  |                  | 0.607 | 0.184 | 1.266 |
| Serum | RA vs. normal                                                | 952.800  | 848.650 | 0.990 | PC(O-20:0/22:6(4Z,7Z,10Z,13Z,16Z,19Z)C <sub>50</sub> H <sub>90</sub> NO <sub>7</sub> P       |                                                                  |                  | 1.681 | 0.020 | 1.480 |
| Serum | cold vs. hot                                                 | 1227.490 | 879.738 | 0.990 | SM 45:1                                                                                      | C <sub>50</sub> H <sub>101</sub> N <sub>2</sub> O <sub>6</sub> P |                  | 0.208 | 0.240 | 1.173 |
| Serum | cold vs. normal                                              | 505.180  | 572.370 | 0.990 | LysoPC(22:4(7Z,10Z,13Z,16Z)) PC(22:4C <sub>30</sub> H <sub>54</sub> NO <sub>7</sub> P        |                                                                  |                  | 1.506 | 0.001 | 2.380 |
| Serum | cold vs. hot                                                 | 884.770  | 836.613 | 0.990 | PC(22:1(11Z)/18:4(6Z,9Z,12Z,15Z))                                                            | C <sub>48</sub> H <sub>86</sub> NO <sub>8</sub> P                |                  | 1.406 | 0.250 | 1.431 |
| Serum | cold vs. hot                                                 | 348.160  | 236.162 | 1.000 | Stovaine Amylocaine Amylocaine (BAN)                                                         | C <sub>14</sub> H <sub>21</sub> NO <sub>2</sub>                  | 644-26-8         | 0.441 | 0.198 | 1.214 |
| Serum | cold vs. normal; hot vs. normal; RA vs. normal               | 860.920  | 431.385 | 0.990 | $\alpha$ -Tocopherol Vitamin E Tocopherol (JP1C <sub>29</sub> H <sub>50</sub> O <sub>2</sub> |                                                                  | 59-02-9 1010.482 |       | 0.070 | 1.593 |
| Serum | cold vs. normal                                              | 482.620  | 568.336 | 0.990 | PC(22:6(4E,7E,10E,13E,16E,19E)/0:0) [C <sub>30</sub> H <sub>50</sub> NO <sub>7</sub> P       |                                                                  |                  | 1.204 | 0.268 | 1.122 |
| Serum | cold vs. hot; hot vs. normal; cold vs. hot; RA vs. normal    | 284.710  | 414.204 | 0.980 | (2S)-1-[6-[(10aS)-1,3-dioxo-10,10a-dihydro-5H-imidazo[1,5-b]isoquinolin-2-                   |                                                                  |                  | 2.158 | 0.343 | 1.030 |
| Serum | cold vs. hot; hot vs. normal; cold vs. hot; RA vs. normal    | 744.190  | 391.283 | 0.980 | Diisooctyl phthalate                                                                         | C <sub>24</sub> H <sub>38</sub> O <sub>4</sub>                   | 27554-26-3       | 0.687 | 0.331 | 1.088 |
| Serum | cold vs. hot                                                 | 954.190  | 814.631 | 0.980 | PC(19:1(10Z)/19:1(10Z))[U]                                                                   | C <sub>46</sub> H <sub>88</sub> NO <sub>8</sub> P                |                  | 0.267 | 0.262 | 1.087 |
| Serum | cold vs. hot; hot vs. normal; RA vs. normal                  | 906.790  | 774.598 | 0.980 | PC(13:0/22:1(11Z))                                                                           | C <sub>43</sub> H <sub>84</sub> NO <sub>8</sub> P                |                  | 0.504 | 0.266 | 1.069 |
| Serum | cold vs. hot; hot vs. normal; RA vs. normal                  | 943.990  | 796.620 | 0.980 | PC(20:2(11Z,14Z)/P-18:1(11Z)) PC(20:2C <sub>46</sub> H <sub>86</sub> NO <sub>7</sub> P       |                                                                  |                  | 0.738 | 0.378 | 1.071 |
| Serum | cold vs. hot                                                 | 1246.210 | 905.755 | 0.980 | SM 47:2                                                                                      | C <sub>52</sub> H <sub>103</sub> N <sub>2</sub> O <sub>6</sub> P |                  | 0.333 | 0.175 | 1.253 |
| Serum | cold vs. hot; cold vs. normal; RA vs. normal; hot vs. normal | 588.500  | 242.284 | 1.000 | 1-Hexadecylamine                                                                             | C <sub>16</sub> H <sub>35</sub> N                                | 143-27-1         | 0.511 | 0.078 | 1.594 |
| Serum | cold vs. hot; cold vs. normal; RA vs. normal; hot vs. normal | 585.780  | 507.272 | 0.980 | (22E)-26,26,26,27,27,27-hexafluoro-25-1                                                      | C <sub>27</sub> H <sub>36</sub> F <sub>6</sub> O <sub>2</sub>    |                  | 0.216 | 0.030 | 1.840 |
| Serum | cold vs. hot; cold vs. normal; RA vs. normal; hot vs. normal | 860.440  | 818.604 | 0.980 | PC(P-18:1(9Z)/22:5(4Z,7Z,10Z,13Z,16Z)C <sub>48</sub> H <sub>84</sub> NO <sub>7</sub> P       |                                                                  |                  | 1.281 | 0.151 | 1.507 |
| Serum | cold vs. hot; cold vs. normal; RA vs. normal; hot vs. normal | 910.360  | 796.618 | 0.980 | PC(O-16:0/22:4(7Z,10Z,13Z,16Z))                                                              | C <sub>46</sub> H <sub>86</sub> NO <sub>7</sub> P                |                  | 0.620 | 0.315 | 1.030 |
| Serum | cold vs. hot; cold vs. normal; RA vs. normal; hot vs. normal | 424.440  | 415.210 | 0.980 | 6-[3-[(3,4-dimethoxyphenyl)methyl]-4-m                                                       | C <sub>24</sub> H <sub>32</sub> O <sub>7</sub>                   |                  | 0.843 | 0.071 | 1.595 |
| Serum | cold vs. hot; cold vs. normal; RA vs. normal; hot vs. normal | 798.460  | 756.553 | 0.970 | PC 32:0 PC(10:0/22:0)                                                                        | C <sub>40</sub> H <sub>80</sub> NO <sub>8</sub> P                |                  | 1.531 | 0.240 | 1.056 |
| Serum | cold vs. hot; cold vs. normal; RA vs. normal; hot vs. normal | 679.410  | 590.452 | 0.970 | CerP(d18:1/14:0)                                                                             | C <sub>32</sub> H <sub>64</sub> NO <sub>6</sub> P                |                  | 0.613 | 0.039 | 1.316 |
| Serum | cold vs. hot; cold vs. normal; RA vs. normal; hot vs. normal | 958.140  | 788.622 | 0.970 | PC(14:0/22:1(11Z))                                                                           | C <sub>44</sub> H <sub>86</sub> NO <sub>8</sub> P                |                  | 1.875 | 0.033 | 1.295 |
| Serum | cold vs. hot                                                 | 724.240  | 604.566 | 0.970 | Cer-NS d39:3 Cer-NS d21:3/18:0 Cer[NSC <sub>39</sub> H <sub>73</sub> NO <sub>3</sub>         |                                                                  |                  | 0.664 | 0.376 | 1.043 |
| Serum | cold vs. hot; cold vs. normal                                | 622.780  | 331.262 | 0.970 | All-cis-4,7,10,13,16-docosapentaenoic ac                                                     | C <sub>22</sub> H <sub>34</sub> O <sub>2</sub>                   | 25182-74-5       | 2.136 | 0.080 | 1.581 |
| Serum | cold vs. hot                                                 | 406.980  | 415.210 | 0.970 | 2H-Oxireno[1,10a]phenanthro[3,2-b]fura                                                       | C <sub>24</sub> H <sub>32</sub> O <sub>7</sub>                   |                  | 0.511 | 0.285 | 1.037 |
| Serum | cold vs. hot; cold vs. normal                                | 357.240  | 246.152 | 1.000 | Tropacocaine Benzoyltropein Benzoyltro                                                       | C <sub>15</sub> H <sub>19</sub> NO <sub>2</sub>                  | 537-26-8 190.458 |       | 0.024 | 2.046 |
| Serum | cold vs. normal                                              | 788.770  | 780.552 | 0.970 | PC 34:2                                                                                      | C <sub>42</sub> H <sub>80</sub> NO <sub>8</sub> P                |                  | 2.464 | 0.154 | 1.253 |
| Serum | cold vs. normal                                              | 786.290  | 754.536 | 0.970 | PC 32:1                                                                                      | C <sub>40</sub> H <sub>78</sub> NO <sub>8</sub> P                |                  | 1.961 | 0.023 | 1.861 |

|       |                                                              |          |         |       |                                          |                                                                 |            |       |       |       |
|-------|--------------------------------------------------------------|----------|---------|-------|------------------------------------------|-----------------------------------------------------------------|------------|-------|-------|-------|
| Serum | cold vs. hot                                                 | 812.100  | 744.553 | 0.970 | PC(13:0/20:2(11Z,14Z))                   | C <sub>41</sub> H <sub>78</sub> NO <sub>8</sub> P               | 1.540      | 0.255 | 1.210 |       |
| Serum | cold vs. hot; cold vs. normal                                | 842.080  | 742.537 | 0.960 | PE 36:3                                  | C <sub>41</sub> H <sub>76</sub> NO <sub>8</sub> P               | 0.575      | 0.218 | 1.167 |       |
| Serum | hot vs. normal                                               | 520.450  | 494.359 | 0.960 | PC(P-17:0/0:0)                           | C <sub>25</sub> H <sub>52</sub> NO <sub>6</sub> P               | 0.717      | 0.150 | 1.016 |       |
| Serum | cold vs. hot                                                 | 370.250  | 250.177 | 1.000 | Alprenolol                               | C <sub>15</sub> H <sub>23</sub> NO <sub>2</sub>                 | 13655-52-2 | 0.789 | 0.169 | 1.276 |
| Serum | cold vs. normal                                              | 629.790  | 383.315 | 0.960 | MG(0:0/20:2(11Z,14Z)/0:0)                | C <sub>23</sub> H <sub>42</sub> O <sub>4</sub>                  | 0.649      | 0.263 | 1.009 |       |
| Serum | cold vs. normal; hot vs. normal; RA vs. normal               | 936.430  | 838.630 | 0.960 | PC(22:1(11Z)/18:3(6Z,9Z,12Z))            | C <sub>48</sub> H <sub>88</sub> NO <sub>8</sub> P               | 1.970      | 0.229 | 1.118 |       |
| Serum | cold vs. normal; hot vs. normal; RA vs. normal               | 792.570  | 854.567 | 0.960 | PC(20:4(5Z,8Z,11Z,14Z)/22:6(4Z,7Z,10Z))  | C <sub>50</sub> H <sub>80</sub> NO <sub>8</sub> P               | 1.689      | 0.055 | 1.305 |       |
| Serum | cold vs. normal                                              | 852.960  | 806.565 | 0.960 | PC(20:4(5Z,8Z,11Z,14Z)/18:2(9Z,12Z))     | C <sub>46</sub> H <sub>80</sub> NO <sub>8</sub> P               | 0.365      | 0.244 | 1.165 |       |
| Serum | cold vs. hot; hot vs. normal; RA vs. normal                  | 637.010  | 588.437 | 0.960 | CerP 32:2                                | C <sub>32</sub> H <sub>62</sub> NO <sub>6</sub> P               | 1.485      | 0.357 | 1.063 |       |
| Serum | cold vs. hot; hot vs. normal; RA vs. normal                  | 546.530  | 532.372 | 0.960 | lysoPC 18:0                              | C <sub>26</sub> H <sub>56</sub> NO <sub>6</sub> P               | 0.745      | 0.122 | 1.161 |       |
| Serum | cold vs. normal                                              | 540.950  | 550.385 | 0.960 | PC(O-18:1(10E)/2:0)                      | C <sub>28</sub> H <sub>56</sub> NO <sub>7</sub> P               | 1.216      | 0.102 | 1.479 |       |
| Serum | cold vs. normal; hot vs. normal; RA vs. normal               | 898.900  | 818.604 | 0.960 | PC(P-18:1(11Z)/22:5(4Z,7Z,10Z,13Z,16Z))  | C <sub>48</sub> H <sub>84</sub> NO <sub>7</sub> P               | 0.593      | 0.193 | 1.167 |       |
| Serum | cold vs. normal; hot vs. normal; RA vs. normal               | 393.460  | 409.160 | 0.960 | Amlodipine                               | C <sub>20</sub> H <sub>25</sub> ClN <sub>2</sub> O <sub>5</sub> | 88150-42-9 | 1.274 | 0.100 | 1.145 |
| Serum | cold vs. normal                                              | 790.680  | 279.231 | 0.960 | γ-Linolenic acid                         | C <sub>18</sub> H <sub>30</sub> O <sub>2</sub>                  | 506-26-3   | 1.793 | 0.117 | 1.537 |
| Serum | hot vs. normal                                               | 836.440  | 790.571 | 0.950 | PC(P-16:0/22:6(4Z,7Z,10Z,13Z,16Z,19Z))   | C <sub>46</sub> H <sub>80</sub> NO <sub>7</sub> P               | 0.512      | 0.002 | 1.800 |       |
| Serum | cold vs. hot                                                 | 1187.900 | 903.739 | 0.950 | TAG 54:5 TAG 15:0-19:3-20:2 TG 54:5      | C <sub>57</sub> H <sub>100</sub> O <sub>6</sub>                 | 0.500      | 0.410 | 1.051 |       |
| Serum | hot vs. normal; RA vs. normal; cold vs. hot; cold vs. normal | 386.040  | 343.295 | 0.950 | Cocamidopropylβine Cocamidoprpylβine     | C <sub>19</sub> H <sub>38</sub> N <sub>2</sub> O <sub>3</sub>   | 1.224      | 0.055 | 1.242 |       |
| Serum | hot vs. normal; RA vs. normal; cold vs. hot; cold vs. normal | 1082.290 | 837.677 | 0.950 | SM 42:1                                  | C <sub>47</sub> H <sub>95</sub> N <sub>2</sub> O <sub>6</sub> P | 0.442      | 0.283 | 1.271 |       |
| Serum | hot vs. normal; RA vs. normal; cold vs. hot; cold vs. normal | 591.430  | 331.284 | 0.950 | Glycerol 1-hexadecanoate                 | C <sub>19</sub> H <sub>38</sub> O <sub>4</sub>                  | 542-44-9   | 0.317 | 0.333 | 1.083 |
| Serum | hot vs. normal; RA vs. normal; cold vs. hot; cold vs. normal | 926.780  | 824.617 | 0.950 | PC(22:2(13Z,16Z)/17:2(9Z,12Z))           | C <sub>47</sub> H <sub>86</sub> NO <sub>8</sub> P               | 0.588      | 0.007 | 1.713 |       |
| Serum | cold vs. hot                                                 | 176.830  | 265.118 | 1.000 | N-γ-Acetyl-N-2-Formyl-5-methoxykynur     | C <sub>13</sub> H <sub>16</sub> N <sub>2</sub> O <sub>4</sub>   | 52450-38-1 | 3.910 | 0.002 | 2.367 |
| Serum | cold vs. hot; cold vs. normal                                | 586.530  | 523.244 | 0.950 | Trilobolide                              | C <sub>27</sub> H <sub>38</sub> O <sub>10</sub>                 | 50657-07-3 | 0.291 | 0.068 | 1.634 |
| Serum | cold vs. normal                                              | 832.220  | 804.550 | 0.940 | PC 36:4                                  | C <sub>44</sub> H <sub>80</sub> NO <sub>8</sub> P               | 0.677      | 0.312 | 1.159 |       |
| Serum | cold vs. normal; hot vs. normal; RA vs. normal               | 863.100  | 742.573 | 0.940 | PC(16:1(9Z)/P-18:1(11Z)) PC(16:1(9Z)/I   | C <sub>42</sub> H <sub>80</sub> NO <sub>7</sub> P               | 0.569      | 0.040 | 1.728 |       |
| Serum | cold vs. normal; hot vs. normal; RA vs. normal               | 930.510  | 746.603 | 0.940 | 1-O-Hexadecyl-2-(9Z-octadecenyl)-sn-g    | C <sub>42</sub> H <sub>85</sub> NO <sub>7</sub> P               | 0.392      | 0.037 | 1.731 |       |
| Serum | cold vs. normal                                              | 1125.020 | 837.677 | 0.940 | SM 42:1                                  | C <sub>47</sub> H <sub>95</sub> N <sub>2</sub> O <sub>6</sub> P | 2.414      | 0.093 | 1.466 |       |
| Serum | cold vs. normal                                              | 899.100  | 794.603 | 0.940 | PC(P-18:1(9Z)/20:3(8Z,11Z,14Z))          | C <sub>46</sub> H <sub>84</sub> NO <sub>7</sub> P               | 0.537      | 0.295 | 1.013 |       |
| Serum | cold vs. hot; cold vs. normal                                | 820.020  | 806.568 | 0.940 | PC 36:3                                  | C <sub>44</sub> H <sub>82</sub> NO <sub>8</sub> P               | 1.269      | 0.324 | 1.238 |       |
| Serum | cold vs. hot                                                 | 645.660  | 561.410 | 0.940 | SM 24:2                                  | C <sub>29</sub> H <sub>57</sub> N <sub>2</sub> O <sub>6</sub> P | 1.466      | 0.312 | 1.119 |       |
| Serum | cold vs. normal                                              | 504.350  | 548.369 | 0.930 | PC(20:2(11Z,14Z)/0:0)                    | C <sub>28</sub> H <sub>54</sub> NO <sub>7</sub> P               | 1.224      | 0.281 | 1.006 |       |
| Serum | cold vs. hot                                                 | 725.580  | 321.278 | 0.930 | Cis-8,11,14-Eicosatrienoic acid Methyl e | C <sub>21</sub> H <sub>36</sub> O <sub>2</sub>                  | 21061-10-9 | 1.370 | 0.445 | 1.022 |
| Serum | hot vs. normal; RA vs. normal                                | 492.680  | 502.325 | 0.930 | lysoPC 16:0                              | C <sub>24</sub> H <sub>50</sub> NO <sub>6</sub> P               | 0.616      | 0.037 | 1.277 |       |
| Serum | cold vs. hot                                                 | 737.110  | 282.278 | 1.000 | Oleamide                                 | C <sub>18</sub> H <sub>35</sub> NO                              | 301-02-0   | 0.370 | 0.215 | 1.210 |
| Serum | cold vs. normal                                              | 501.750  | 510.354 | 0.930 | PC(16:0/O-1:0)                           | C <sub>25</sub> H <sub>52</sub> NO <sub>7</sub> P               | 1.362      | 0.075 | 1.530 |       |

|       |                                                              |          |         |       |                                        |                                                                 |            |       |       |       |
|-------|--------------------------------------------------------------|----------|---------|-------|----------------------------------------|-----------------------------------------------------------------|------------|-------|-------|-------|
| Serum | hot vs. normal                                               | 864.370  | 772.584 | 0.930 | PC(13:0/22:2(13Z,16Z))                 | C <sub>43</sub> H <sub>82</sub> NO <sub>8</sub> P               | 0.773      | 0.168 | 1.007 |       |
| Serum | cold vs. normal; RA vs. normal                               | 819.130  | 828.549 | 0.930 | PC 38:6                                | C <sub>46</sub> H <sub>80</sub> NO <sub>8</sub> P               | 0.662      | 0.227 | 1.190 |       |
| Serum | cold vs. hot                                                 | 847.260  | 808.583 | 0.930 | PC 36:2                                | C <sub>44</sub> H <sub>84</sub> NO <sub>8</sub> P               | 1.199      | 0.533 | 1.159 |       |
| Serum | cold vs. hot                                                 | 673.840  | 284.294 | 1.000 | Stearamide                             | C <sub>18</sub> H <sub>37</sub> NO                              | 124-26-5   | 0.120 | 0.008 | 2.093 |
| Serum | cold vs. normal; hot vs. normal; RA vs. normal               | 863.990  | 764.556 | 0.920 | plasmenyl-PC 34:2                      | C <sub>42</sub> H <sub>80</sub> NO <sub>7</sub> P               | 0.328      | 0.029 | 1.815 |       |
| Serum | cold vs. normal; hot vs. normal; RA vs. normal               | 931.680  | 770.603 | 0.920 | PC(O-16:0/20:3(8Z,11Z,14Z))            | C <sub>44</sub> H <sub>84</sub> NO <sub>7</sub> P               | 0.468      | 0.017 | 1.430 |       |
| Serum | cold vs. normal; hot vs. normal; RA vs. normal               | 392.050  | 223.063 | 0.920 | Fraxidin 8-Hydroxy-6,7-dimethoxy-2H-1  | C <sub>11</sub> H <sub>10</sub> O <sub>5</sub>                  | 525-21-3   | 1.872 | 0.036 | 1.293 |
| Serum | cold vs. normal                                              | 462.030  | 526.291 | 0.920 | lysoPE 20:3                            | C <sub>25</sub> H <sub>46</sub> NO <sub>7</sub> P               | 1.295      | 0.293 | 1.004 |       |
| Serum | hot vs. normal; RA vs. normal                                | 553.890  | 348.285 | 0.920 | O-Arachidonoyl Ethanolamine Virodham   | C <sub>22</sub> H <sub>37</sub> NO <sub>2</sub>                 | 443129-35- | 1.687 | 0.044 | 1.243 |
| Serum | cold vs. normal                                              | 761.460  | 678.505 | 0.920 | PC(13:0/15:0)                          | C <sub>36</sub> H <sub>72</sub> NO <sub>8</sub> P               | 1.903      | 0.154 | 1.249 |       |
| Serum | cold vs. hot; RA vs. normal; cold vs. normal                 | 1246.930 | 900.799 | 0.920 | Triacylglycerol 18:1-18:1-18:2         | C <sub>57</sub> H <sub>102</sub> O <sub>6</sub>                 | 0.273      | 0.261 | 1.072 |       |
| Serum | cold vs. hot; RA vs. normal; cold vs. normal                 | 540.130  | 349.273 | 0.910 | 17β-Hydroxy-2α-(methoxymethyl)-17-m    | C <sub>22</sub> H <sub>36</sub> O <sub>3</sub>                  | 1.440      | 0.222 | 1.193 |       |
| Serum | cold vs. hot                                                 | 827.440  | 770.566 | 0.910 | PC(16:0/19:3(9Z,12Z,15Z))[U]           | C <sub>43</sub> H <sub>80</sub> NO <sub>8</sub> P               | 1.227      | 0.460 | 1.058 |       |
| Serum | cold vs. normal                                              | 575.030  | 358.294 | 0.910 | N-palmitoyl threonine                  | C <sub>20</sub> H <sub>39</sub> NO <sub>4</sub>                 | 1.626      | 0.130 | 1.403 |       |
| Serum | cold vs. hot; RA vs. normal                                  | 580.430  | 560.405 | 0.910 | lysoDGTS 23:6                          | C <sub>33</sub> H <sub>53</sub> NO <sub>6</sub>                 | 1.576      | 0.357 | 1.010 |       |
| Serum | cold vs. hot                                                 | 938.450  | 823.639 | 0.910 | 18:3-Glc-Campesterol                   | C <sub>52</sub> H <sub>86</sub> O <sub>7</sub>                  | 0.688      | 0.329 | 1.023 |       |
| Serum | RA vs. normal                                                | 944.490  | 577.517 | 0.910 | Cohibin C                              | C <sub>37</sub> H <sub>68</sub> O <sub>4</sub>                  | 1.687      | 0.163 | 1.117 |       |
| Serum | cold vs. hot                                                 | 900.840  | 838.621 | 0.910 | PC 38:1                                | C <sub>46</sub> H <sub>90</sub> NO <sub>8</sub> P               | 1.562      | 0.515 | 1.046 |       |
| Serum | hot vs. normal; RA vs. normal; cold vs. hot                  | 746.760  | 297.278 | 0.910 | Methyl oleate                          | C <sub>19</sub> H <sub>36</sub> O <sub>2</sub>                  | 112-62-9   | 0.764 | 0.073 | 1.147 |
| Serum | hot vs. normal; RA vs. normal; cold vs. hot                  | 669.860  | 298.310 | 0.910 | Tridemorph 2,6-Dimethyl-4-tridecylmorp | C <sub>19</sub> H <sub>39</sub> NO                              | 81412-43-3 | 0.491 | 0.009 | 2.132 |
| Serum | hot vs. normal                                               | 697.640  | 615.457 | 0.900 | SM d28:3 SM d14:3/14:0 SM(d14:3/14:0   | C <sub>33</sub> H <sub>63</sub> N <sub>2</sub> O <sub>6</sub> P | 1.495      | 0.122 | 1.096 |       |
| Serum | cold vs. hot                                                 | 686.980  | 293.225 | 1.000 | 3β-Fluoroandrost-5-en-17β-ol           | C <sub>19</sub> H <sub>29</sub> FO                              | 1.413      | 0.378 | 1.121 |       |
| Serum | cold vs. hot; cold vs. normal                                | 319.340  | 363.216 | 0.900 | Hydrocortisone                         | C <sub>21</sub> H <sub>30</sub> O <sub>5</sub>                  | 50-23-7    | 2.461 | 0.039 | 1.767 |
| Serum | hot vs. normal                                               | 302.800  | 391.229 | 0.900 | Hexa(methoxymethyl)melamine 2-N,2-N.   | C <sub>15</sub> H <sub>30</sub> N <sub>6</sub> O <sub>6</sub>   | 3089-11-0  | 0.464 | 0.103 | 1.148 |
| Serum | cold vs. normal; RA vs. normal                               | 863.410  | 718.571 | 0.900 | PC(P-20:0/12:0)                        | C <sub>40</sub> H <sub>80</sub> NO <sub>7</sub> P               | 0.574      | 0.078 | 1.521 |       |
| Serum | cold vs. hot                                                 | 423.660  | 432.236 | 0.900 | 7b,9-Dihydroxy-3-(hydroxymethyl)-1,1,6 | C <sub>22</sub> H <sub>30</sub> O <sub>6</sub>                  | 0.781      | 0.364 | 1.001 |       |
| Serum | cold vs. hot; cold vs. normal; hot vs. normal; RA vs. normal | 630.680  | 270.279 | 0.900 | Capsi-amide N-(13-Methyltetradecyl)ace | C <sub>17</sub> H <sub>35</sub> NO                              | 64317-66-4 | 0.462 | 0.164 | 1.343 |
| Serum | cold vs. hot; cold vs. normal; hot vs. normal; RA vs. normal | 830.200  | 740.521 | 0.900 | PE 36:4                                | C <sub>41</sub> H <sub>74</sub> NO <sub>8</sub> P               | 0.496      | 0.083 | 1.191 |       |
| Serum | cold vs. hot; cold vs. normal; hot vs. normal; RA vs. normal | 807.180  | 740.522 | 0.900 | PE 36:4                                | C <sub>41</sub> H <sub>74</sub> NO <sub>8</sub> P               | 0.406      | 0.141 | 1.362 |       |
| Serum | cold vs. hot; cold vs. normal; hot vs. normal; RA vs. normal | 584.900  | 424.341 | 0.900 | α-Tocotrienoxyl radical                | C <sub>29</sub> H <sub>43</sub> O <sub>2</sub>                  | 1.734      | 0.096 | 1.437 |       |
| Serum | cold vs. hot; cold vs. normal; hot vs. normal; RA vs. normal | 517.070  | 482.323 | 0.900 | lysoPE 18:0                            | C <sub>23</sub> H <sub>48</sub> NO <sub>7</sub> P               | 1.444      | 0.229 | 1.154 |       |
| Serum | cold vs. hot; cold vs. normal; hot vs. normal; RA vs. normal | 757.750  | 373.309 | 0.900 | (+)-Dysideapalaunic acid               | C <sub>25</sub> H <sub>40</sub> O <sub>2</sub>                  | 1.595      | 0.365 | 1.009 |       |
| Serum | cold vs. hot; cold vs. normal; hot vs. normal; RA vs. normal | 788.990  | 299.294 | 1.000 | Nonadecanoic acid Nonadecylic acid FA  | C <sub>19</sub> H <sub>38</sub> O <sub>2</sub>                  | 646-30-0   | 0.648 | 0.019 | 1.444 |
| Serum | cold vs. normal                                              | 570.370  | 355.283 | 0.900 | 1-Linoleoyl-Rac-Glycerol               | C <sub>21</sub> H <sub>38</sub> O <sub>4</sub>                  | 2277-28-3  | 0.693 | 0.283 | 1.151 |

|       |                                                               |          |         |       |                                                                                                       |                                                                 |            |       |       |       |
|-------|---------------------------------------------------------------|----------|---------|-------|-------------------------------------------------------------------------------------------------------|-----------------------------------------------------------------|------------|-------|-------|-------|
| Serum | hot vs. normal                                                | 576.970  | 562.422 | 0.890 | CerP(d18:1/12:0)                                                                                      | C <sub>30</sub> H <sub>60</sub> NO <sub>6</sub> P               | 0.704      | 0.141 | 1.112 |       |
| Serum | cold vs. normal; hot vs. normal; RA vs. normal; cold vs. norm | 589.220  | 552.402 | 0.890 | PC(O-18:0/2:0)                                                                                        | C <sub>28</sub> H <sub>58</sub> NO <sub>7</sub> P               | 1.279      | 0.264 | 1.018 |       |
| Serum | cold vs. normal; hot vs. normal; RA vs. normal                | 890.180  | 786.599 | 0.890 | 1,2-Dioleoyl PC                                                                                       | C <sub>44</sub> H <sub>84</sub> NO <sub>8</sub> P               | 56648-95-4 | 0.627 | 0.153 | 1.302 |
| Serum | cold vs. normal                                               | 600.060  | 578.415 | 0.890 | PC(22:1(11Z)/0:0)                                                                                     | C <sub>30</sub> H <sub>60</sub> NO <sub>7</sub> P               |            | 1.952 | 0.211 | 1.234 |
| Serum | cold vs. hot; cold vs. normal; hot vs. normal; RA vs. normal  | 568.670  | 302.244 | 1.000 | Trihexyphenidyl Trihexyphenidyl (INN)                                                                 | C <sub>20</sub> H <sub>31</sub> NO                              | 144-11-6   | 0.314 | 0.013 | 2.066 |
| Serum | cold vs. hot; cold vs. normal; hot vs. normal; RA vs. normal  | 622.890  | 562.416 | 0.890 | lysoDGTS 23:5                                                                                         | C <sub>33</sub> H <sub>55</sub> NO <sub>6</sub>                 |            | 1.353 | 0.414 | 1.058 |
| Serum | cold vs. hot                                                  | 763.120  | 381.350 | 0.890 | Brassicasterol 24-epibrassicasterol                                                                   | C <sub>28</sub> H <sub>46</sub> O                               | 474-67-9   | 1.958 | 0.099 | 1.533 |
| Serum | hot vs. normal                                                | 489.000  | 482.359 | 0.880 | 1-O-Hexadecyl-lyso-sn-glycero-3-phosph                                                                | C <sub>24</sub> H <sub>52</sub> NO <sub>6</sub> P               |            | 0.804 | 0.192 | 1.038 |
| Serum | cold vs. hot; cold vs. normal                                 | 991.410  | 835.665 | 0.880 | SM 42:2                                                                                               | C <sub>47</sub> H <sub>93</sub> N <sub>2</sub> O <sub>6</sub> P |            | 0.390 | 0.334 | 1.258 |
| Serum | cold vs. hot                                                  | 599.100  | 304.260 | 1.000 | Fenpropimorph                                                                                         | C <sub>20</sub> H <sub>33</sub> NO                              | 67306-03-0 | 0.459 | 0.278 | 1.057 |
| Serum | cold vs. normal; hot vs. normal; RA vs. normal                | 952.520  | 835.664 | 0.880 | SM 42:2                                                                                               | C <sub>47</sub> H <sub>93</sub> N <sub>2</sub> O <sub>6</sub> P |            | 2.965 | 0.060 | 1.662 |
| Serum | cold vs. hot                                                  | 1084.090 | 835.665 | 0.880 | SM 42:2                                                                                               | C <sub>47</sub> H <sub>93</sub> N <sub>2</sub> O <sub>6</sub> P |            | 1.554 | 0.241 | 1.140 |
| Serum | cold vs. hot; hot vs. normal; cold vs. normal; RA vs. normal  | 523.040  | 535.394 | 0.880 | 6-(diaminomethylideneamino)-2-[[[(4E,6E)C <sub>25</sub> H <sub>50</sub> N <sub>4</sub> O <sub>5</sub> |                                                                 |            | 1.392 | 0.408 | 1.037 |
| Serum | cold vs. hot; hot vs. normal; cold vs. normal; RA vs. normal  | 891.310  | 808.581 | 0.880 | PC(18:0/20:5(5Z,8Z,11Z,14Z,17Z))[U]                                                                   | C <sub>46</sub> H <sub>82</sub> NO <sub>8</sub> P               |            | 0.158 | 0.039 | 1.727 |
| Serum | cold vs. hot; hot vs. normal; cold vs. normal; RA vs. normal  | 948.760  | 849.653 | 0.880 | MGDG 39:1 MGDG 15:0-24:1                                                                              | C <sub>48</sub> H <sub>90</sub> O <sub>10</sub>                 |            | 2.414 | 0.187 | 1.164 |
| Serum | cold vs. hot                                                  | 967.260  | 809.650 | 0.880 | SM 40:1                                                                                               | C <sub>45</sub> H <sub>91</sub> N <sub>2</sub> O <sub>6</sub> P |            | 0.553 | 0.230 | 1.230 |
| Serum | cold vs. normal                                               | 773.620  | 725.554 | 0.880 | SM 34:1                                                                                               | C <sub>39</sub> H <sub>79</sub> N <sub>2</sub> O <sub>6</sub> P |            | 0.679 | 0.268 | 1.135 |
| Serum | cold vs. hot                                                  | 916.710  | 820.619 | 0.870 | PC(O-18:0/22:6(4Z,7Z,10Z,13Z,16Z,19Z)C <sub>48</sub> H <sub>86</sub> NO <sub>7</sub> P                |                                                                 |            | 1.601 | 0.249 | 1.198 |
| Serum | cold vs. hot                                                  | 440.590  | 270.242 | 0.870 | SPI_270.2429_14.9 N-deethylspiroxamin                                                                 | C <sub>16</sub> H <sub>31</sub> NO <sub>2</sub>                 |            | 0.381 | 0.197 | 1.208 |
| Serum | cold vs. normal; hot vs. normal; RA vs. normal                | 493.630  | 544.336 | 0.870 | plasmeryl-PC 18:0                                                                                     | C <sub>26</sub> H <sub>52</sub> NO <sub>7</sub> P               |            | 0.607 | 0.024 | 1.861 |
| Serum | cold vs. normal                                               | 440.780  | 482.322 | 0.870 | LysoPC(15:0) lysoPC 15:0 1-pentadecan                                                                 | C <sub>23</sub> H <sub>48</sub> NO <sub>7</sub> P               |            | 1.491 | 0.071 | 1.578 |
| Serum | cold vs. hot                                                  | 1129.090 | 835.666 | 0.870 | SM 42:2                                                                                               | C <sub>47</sub> H <sub>93</sub> N <sub>2</sub> O <sub>6</sub> P |            | 3.114 | 0.014 | 1.992 |
| Serum | cold vs. hot; cold vs. normal; hot vs. normal; RA vs. normal  | 553.100  | 523.264 | 0.870 | (22E)-26,26,26,27,27,27-hexafluoro-1 $\alpha$ , $\omega$ -                                            | C <sub>27</sub> H <sub>36</sub> F <sub>6</sub> O <sub>3</sub>   |            | 0.072 | 0.003 | 2.220 |
| Serum | cold vs. hot; cold vs. normal; hot vs. normal; RA vs. normal  | 859.250  | 766.573 | 0.870 | PC(18:3(6Z,9Z,12Z)/P-18:1(11Z)) PC(18C <sub>44</sub> H <sub>80</sub> NO <sub>7</sub> P                |                                                                 |            | 0.649 | 0.056 | 1.644 |
| Serum | cold vs. hot; cold vs. normal; hot vs. normal; RA vs. normal  | 898.900  | 819.606 | 0.870 | PG(17:0/22:1(11Z))                                                                                    | C <sub>45</sub> H <sub>87</sub> O <sub>10</sub> P               |            | 0.529 | 0.032 | 1.330 |
| Serum | cold vs. hot                                                  | 916.960  | 833.649 | 0.860 | SM 42:3                                                                                               | C <sub>47</sub> H <sub>91</sub> N <sub>2</sub> O <sub>6</sub> P |            | 1.904 | 0.090 | 1.694 |
| Serum | cold vs. normal                                               | 695.600  | 251.200 | 0.860 | 7z,10z,13z-Hexadecatrienoic Acid                                                                      | C <sub>16</sub> H <sub>26</sub> O <sub>2</sub>                  |            | 1.560 | 0.198 | 1.306 |
| Serum | cold vs. normal                                               | 271.760  | 313.155 | 1.000 | Phe-Phe                                                                                               | C <sub>18</sub> H <sub>20</sub> N <sub>2</sub> O <sub>3</sub>   | 2577-40-4  | 2.041 | 0.154 | 1.343 |
| Serum | cold vs. hot                                                  | 435.030  | 542.323 | 0.860 | lysoPC 18:2                                                                                           | C <sub>26</sub> H <sub>50</sub> NO <sub>7</sub> P               |            | 1.901 | 0.354 | 1.029 |
| Serum | hot vs. normal; RA vs. normal; cold vs. hot                   | 527.150  | 532.375 | 0.860 | LysoPC(O-18:0) lysoPC 18:0 PC(O-18:0)C <sub>26</sub> H <sub>56</sub> NO <sub>6</sub> P                |                                                                 |            | 0.624 | 0.111 | 1.157 |
| Serum | hot vs. normal; RA vs. normal; cold vs. hot                   | 655.650  | 275.273 | 0.860 | Isodigeranyl                                                                                          | C <sub>20</sub> H <sub>34</sub>                                 | 5981-30-6  | 0.591 | 0.115 | 1.583 |
| Serum | hot vs. normal; RA vs. normal; cold vs. hot                   | 861.140  | 819.607 | 0.860 | PG(17:1(9Z)/22:0)                                                                                     | C <sub>45</sub> H <sub>87</sub> O <sub>10</sub> P               |            | 1.309 | 0.135 | 1.557 |
| Serum | cold vs. normal                                               | 127.560  | 166.086 | 0.850 | D-Phenylalanine                                                                                       | C <sub>9</sub> H <sub>11</sub> NO <sub>2</sub>                  | 673-06-3   | 1.445 | 0.001 | 2.370 |
| Serum | cold vs. hot; hot vs. normal; RA vs. normal                   | 655.730  | 293.283 | 0.850 | 9R,10S-Epoxy-3Z,6Z-eicosadiene                                                                        | C <sub>20</sub> H <sub>36</sub> O                               |            | 0.562 | 0.160 | 1.474 |

|       |                                                              |          |         |       |                                                  |                                                                 |            |       |       |       |
|-------|--------------------------------------------------------------|----------|---------|-------|--------------------------------------------------|-----------------------------------------------------------------|------------|-------|-------|-------|
| Serum | cold vs. hot; hot vs. normal; RA vs. normal                  | 501.090  | 280.263 | 0.850 | Linoleamide                                      | C <sub>18</sub> H <sub>33</sub> NO                              | 3072-13-7  | 0.397 | 0.086 | 1.559 |
| Serum | cold vs. normal                                              | 593.880  | 313.273 | 1.000 | 2,4-dihydroxyheptadecyl acetate                  | C <sub>19</sub> H <sub>38</sub> O <sub>4</sub>                  |            | 0.509 | 0.269 | 1.218 |
| Serum | cold vs. hot                                                 | 984.610  | 836.669 | 0.850 | SM d42:1 SM d16:0/26:1 SM(d16:0/26:1             | C <sub>47</sub> H <sub>95</sub> N <sub>2</sub> O <sub>6</sub> P |            | 0.455 | 0.146 | 1.609 |
| Serum | cold vs. hot                                                 | 801.090  | 802.535 | 0.850 | PC 36:5                                          | C <sub>44</sub> H <sub>78</sub> NO <sub>8</sub> P               |            | 0.680 | 0.233 | 1.126 |
| Serum | cold vs. normal; hot vs. normal; RA vs. normal; cold vs. hot | 1328.500 | 800.669 | 0.850 | SM(d17:1/24:1(15Z))                              | C <sub>46</sub> H <sub>92</sub> N <sub>2</sub> O <sub>6</sub> P |            | 0.690 | 0.180 | 1.227 |
| Serum | cold vs. normal; hot vs. normal; RA vs. normal; cold vs. hot | 523.030  | 534.390 | 0.850 | CerP 28:1                                        | C <sub>28</sub> H <sub>56</sub> NO <sub>6</sub> P               |            | 1.386 | 0.433 | 1.008 |
| Serum | cold vs. normal                                              | 787.740  | 751.570 | 0.850 | SM 36:2                                          | C <sub>41</sub> H <sub>81</sub> N <sub>2</sub> O <sub>6</sub> P |            | 0.395 | 0.061 | 1.604 |
| Serum | cold vs. normal; hot vs. normal; RA vs. normal               | 729.740  | 723.540 | 0.840 | SM 34:2                                          | C <sub>39</sub> H <sub>77</sub> N <sub>2</sub> O <sub>6</sub> P |            | 0.830 | 0.213 | 1.154 |
| Serum | cold vs. hot                                                 | 940.370  | 797.623 | 0.840 | 16:2-Glc-Campesterol                             | C <sub>50</sub> H <sub>84</sub> O <sub>7</sub>                  |            | 0.698 | 0.327 | 1.135 |
| Serum | cold vs. hot; hot vs. normal; RA vs. normal                  | 512.930  | 228.232 | 0.840 | Halaminol A                                      | C <sub>14</sub> H <sub>29</sub> NO                              |            | 0.436 | 0.024 | 1.965 |
| Serum | cold vs. hot; hot vs. normal; RA vs. normal                  | 924.110  | 795.607 | 0.840 | 16:3-Glc-Campesterol                             | C <sub>50</sub> H <sub>82</sub> O <sub>7</sub>                  |            | 0.569 | 0.006 | 1.688 |
| Serum | cold vs. hot; hot vs. normal; RA vs. normal                  | 1329.030 | 788.616 | 0.830 | PC(14:0/22:1(13Z)) PC(14:1(9Z)/22:0) P           | C <sub>44</sub> H <sub>86</sub> NO <sub>8</sub> P               |            | 0.653 | 0.023 | 1.517 |
| Serum | cold vs. hot                                                 | 250.520  | 172.133 | 1.000 | Gabapentin (JAN/USAN/INN) Neurontin              | C <sub>9</sub> H <sub>17</sub> NO <sub>2</sub>                  | 60142-96-3 | 0.261 | 0.277 | 1.062 |
| Serum | cold vs. hot; cold vs. normal; hot vs. normal; RA vs. normal | 621.630  | 679.472 | 0.830 | PA(P-16:0/20:5(5Z,8Z,11Z,14Z,17Z))               | C <sub>39</sub> H <sub>67</sub> O <sub>7</sub> P                |            | 1.709 | 0.035 | 1.905 |
| Serum | cold vs. hot; cold vs. normal; hot vs. normal; RA vs. normal | 572.770  | 706.463 | 0.830 | PG 30:3 PG 13:1-17:2 PG(13:1/17:2)               | C <sub>36</sub> H <sub>65</sub> O <sub>10</sub> P               |            | 1.579 | 0.056 | 1.697 |
| Serum | cold vs. hot; cold vs. normal; hot vs. normal; RA vs. normal | 890.430  | 789.608 | 0.830 | PG(O-16:0/22:2(13Z,16Z))                         | C <sub>44</sub> H <sub>85</sub> O <sub>9</sub> P                |            | 0.484 | 0.032 | 1.773 |
| Serum | cold vs. hot; cold vs. normal; hot vs. normal; RA vs. normal | 717.080  | 697.523 | 0.830 | SM 32:1                                          | C <sub>37</sub> H <sub>75</sub> N <sub>2</sub> O <sub>6</sub> P |            | 0.742 | 0.089 | 1.583 |
| Serum | cold vs. normal                                              | 502.380  | 532.335 | 0.830 | lysoPC 17:0                                      | C <sub>25</sub> H <sub>52</sub> NO <sub>7</sub> P               |            | 1.226 | 0.131 | 1.342 |
| Serum | RA vs. normal                                                | 432.240  | 318.239 | 1.000 | Trihexyphenidyl N-oxide                          | C <sub>20</sub> H <sub>31</sub> NO <sub>2</sub>                 | 161564-79- | 1.793 | 0.099 | 1.184 |
| Serum | cold vs. hot; RA vs. normal                                  | 534.630  | 188.127 | 0.820 | (E)-2-Butenyl-4-methyl-threonine 2-Bute          | C <sub>9</sub> H <sub>17</sub> NO <sub>3</sub>                  | 81135-57-1 | 0.419 | 0.169 | 1.288 |
| Serum | cold vs. hot                                                 | 95.840   | 216.922 | 0.810 | Methyl 2-propenyl pentasulfide                   | C <sub>4</sub> H <sub>8</sub> S <sub>5</sub>                    | 118023-99- | 1.392 | 0.287 | 1.018 |
| Serum | hot vs. normal; RA vs. normal                                | 618.050  | 564.437 | 0.810 | CerP 30:0                                        | C <sub>30</sub> H <sub>62</sub> NO <sub>6</sub> P               |            | 0.695 | 0.085 | 1.217 |
| Serum | cold vs. hot                                                 | 913.190  | 812.615 | 0.810 | PC 36:0 PC(12:0/24:0)                            | C <sub>44</sub> H <sub>88</sub> NO <sub>8</sub> P               |            | 1.699 | 0.454 | 1.122 |
| Serum | cold vs. hot                                                 | 524.200  | 214.179 | 0.810 | N-(9-Oxodecyl)acetamide                          | C <sub>12</sub> H <sub>23</sub> NO <sub>2</sub>                 |            | 0.376 | 0.186 | 1.248 |
| Serum | hot vs. normal; RA vs. normal                                | 473.780  | 518.320 | 0.810 | lysoPC 16:0                                      | C <sub>24</sub> H <sub>50</sub> NO <sub>7</sub> P               |            | 0.712 | 0.114 | 1.016 |
| Serum | hot vs. normal                                               | 501.330  | 320.255 | 1.000 | N-hydroxy arachidonoyl amine                     | C <sub>20</sub> H <sub>33</sub> NO <sub>2</sub>                 |            | 1.434 | 0.101 | 1.058 |
| Serum | cold vs. hot; cold vs. normal; hot vs. normal; RA vs. normal | 577.990  | 694.463 | 0.800 | BMP 29:2 BMP 13:1-16:1 BMP(13:1/16:              | C <sub>35</sub> H <sub>65</sub> O <sub>10</sub> P               |            | 1.186 | 0.492 | 1.173 |
| Serum | cold vs. normal                                              | 530.440  | 546.351 | 0.800 | lysoPC 18:0                                      | C <sub>26</sub> H <sub>54</sub> NO <sub>7</sub> P               |            | 1.156 | 0.303 | 1.011 |
| Serum | RA vs. normal                                                | 544.050  | 399.324 | 0.800 | Calcitriol 1 $\alpha$ ,25-Dihydroxyvitamin D3(1' | C <sub>27</sub> H <sub>44</sub> O <sub>3</sub>                  | 32222-06-3 | 0.774 | 0.147 | 1.083 |
| Serum | cold vs. hot; hot vs. normal; RA vs. normal                  | 1153.660 | 898.784 | 0.800 | TG 54:5                                          | C <sub>57</sub> H <sub>100</sub> O <sub>6</sub>                 |            | 0.260 | 0.145 | 1.383 |
| Serum | RA vs. normal                                                | 679.430  | 591.457 | 0.800 | DG 34:6                                          | C <sub>37</sub> H <sub>60</sub> O <sub>5</sub>                  |            | 0.701 | 0.075 | 1.234 |
| Serum | cold vs. hot                                                 | 788.760  | 603.532 | 0.790 | 1-(14-methyl-pentadecanoyl)-2-(8-[3]-lac         | C <sub>39</sub> H <sub>70</sub> O <sub>4</sub>                  |            | 0.749 | 0.304 | 1.116 |
| Serum | cold vs. normal                                              | 530.420  | 524.370 | 0.790 | 1-Stearoyl-Sn-Glycerol-3-Phosphocholin           | C <sub>26</sub> H <sub>54</sub> NO <sub>7</sub> P               | 19420-57-6 | 1.116 | 0.067 | 1.560 |
| Serum | cold vs. normal; hot vs. normal                              | 876.490  | 816.587 | 0.790 | PC(P-18:1(11Z)/22:6(4Z,7Z,10Z,13Z,16:            | C <sub>48</sub> H <sub>82</sub> NO <sub>7</sub> P               |            | 0.492 | 0.233 | 1.211 |

|       |                                                              |         |         |       |                                                                                                      |                                                                             |            |       |       |       |
|-------|--------------------------------------------------------------|---------|---------|-------|------------------------------------------------------------------------------------------------------|-----------------------------------------------------------------------------|------------|-------|-------|-------|
| Serum | cold vs. normal                                              | 603.780 | 329.246 | 1.000 | Docosahexaenoic acid                                                                                 | C <sub>22</sub> H <sub>32</sub> O <sub>2</sub>                              | 6217-54-5  | 1.758 | 0.249 | 1.058 |
| Serum | cold vs. hot; cold vs. normal; hot vs. normal; RA vs. normal | 676.710 | 673.526 | 0.790 | SM d32:2 SM d14:1/18:1 SM(d14:1/18:1 C <sub>37</sub> H <sub>73</sub> N <sub>2</sub> O <sub>6</sub> P |                                                                             |            | 1.395 | 0.303 | 1.038 |
| Serum | cold vs. hot; cold vs. normal; hot vs. normal; RA vs. normal | 928.420 | 748.610 | 0.790 | DGTS 35:3 DGTS 14:1-21:2 DGTS(14:1 C <sub>45</sub> H <sub>81</sub> NO <sub>7</sub>                   |                                                                             |            | 0.454 | 0.021 | 1.882 |
| Serum | cold vs. hot; cold vs. normal; hot vs. normal; RA vs. normal | 723.470 | 428.372 | 0.780 | Sorbitane Monooleate - Polysorbate 80 in-source fragment                                             |                                                                             |            | 2.082 | 0.051 | 1.257 |
| Serum | cold vs. hot; cold vs. normal; hot vs. normal; RA vs. normal | 612.430 | 331.224 | 1.000 | Deoxycorticosterone                                                                                  | C <sub>21</sub> H <sub>30</sub> O <sub>3</sub>                              | 64-85-7    | 0.568 | 0.430 | 1.074 |
| Serum | cold vs. normal                                              | 860.100 | 792.587 | 0.780 | PC(P-16:0/22:5(4Z,7Z,10Z,13Z,16Z))                                                                   | C <sub>46</sub> H <sub>82</sub> NO <sub>7</sub> P                           |            | 0.488 | 0.173 | 1.277 |
| Serum | cold vs. normal; RA vs. normal                               | 827.840 | 766.536 | 0.780 | PE 38:5                                                                                              | C <sub>43</sub> H <sub>76</sub> NO <sub>8</sub> P                           |            | 0.589 | 0.234 | 1.095 |
| Serum | cold vs. normal                                              | 305.310 | 169.049 | 0.780 | 3,4-Dihydroxyphenylacetate 3,4-Dihydro-                                                              | C <sub>8</sub> H <sub>8</sub> O <sub>4</sub>                                | 102-32-9   | 2.431 | 0.186 | 1.247 |
| Serum | hot vs. normal                                               | 281.640 | 381.198 | 0.780 | Beraprost                                                                                            | C <sub>24</sub> H <sub>30</sub> O <sub>5</sub>                              | 88475-69-8 | 0.531 | 0.168 | 1.022 |
| Serum | cold vs. normal                                              | 578.590 | 695.466 | 0.780 | methyl 13-sophorosyloxydocosanoate                                                                   | C <sub>35</sub> H <sub>66</sub> O <sub>13</sub>                             |            | 1.864 | 0.022 | 1.884 |
| Serum | cold vs. hot; hot vs. normal; RA vs. normal; cold vs. normal | 609.930 | 536.405 | 0.780 | dl- $\alpha$ -Tocopherol nicotinate Tocopheryl ni                                                    | C <sub>35</sub> H <sub>53</sub> NO <sub>3</sub>                             | 51898-34-1 | 1.795 | 0.301 | 1.131 |
| Serum | cold vs. hot; hot vs. normal; RA vs. normal; cold vs. normal | 383.780 | 359.287 | 0.780 | 15(R)-Pinane Thromboxane A2                                                                          | C <sub>24</sub> H <sub>40</sub> O <sub>3</sub>                              |            | 1.222 | 0.087 | 1.096 |
| Serum | cold vs. hot; hot vs. normal; RA vs. normal; cold vs. normal | 744.190 | 413.264 | 0.780 | Bis(2-ethylhexyl)-phthalate                                                                          | C <sub>24</sub> H <sub>38</sub> O <sub>4</sub>                              | 117-81-7   | 0.729 | 0.473 | 1.020 |
| Serum | cold vs. normal                                              | 464.160 | 544.338 | 0.780 | lysoPC 20:4                                                                                          | C <sub>28</sub> H <sub>50</sub> NO <sub>7</sub> P                           |            | 1.224 | 0.149 | 1.285 |
| Serum | cold vs. hot; cold vs. normal                                | 703.410 | 687.541 | 0.780 | SM d33:2 SM d17:1/16:1 SM(d17:1/16:1 C <sub>38</sub> H <sub>75</sub> N <sub>2</sub> O <sub>6</sub> P |                                                                             |            | 1.447 | 0.293 | 1.103 |
| Serum | cold vs. hot; cold vs. normal                                | 622.250 | 678.469 | 0.770 | PS(P-16:0/13:0)                                                                                      | C <sub>35</sub> H <sub>68</sub> NO <sub>9</sub> P                           |            | 1.753 | 0.025 | 1.974 |
| Serum | cold vs. hot; cold vs. normal                                | 414.530 | 643.283 | 0.770 | (2alpha,5alpha,9alpha,10beta,14beta)-2,5                                                             | C <sub>33</sub> H <sub>48</sub> O <sub>10</sub>                             |            | 2.050 | 0.156 | 1.365 |
| Serum | cold vs. hot                                                 | 696.830 | 477.392 | 0.770 | Sarcoaldersterol A (3 $\beta$ ,5 $\alpha$ ,6 $\beta$ ,11 $\alpha$ )-Gorgos                           | C <sub>30</sub> H <sub>52</sub> O <sub>4</sub>                              |            | 1.378 | 0.321 | 1.087 |
| Serum | hot vs. normal; RA vs. normal                                | 635.200 | 590.453 | 0.770 | CerP 32:1                                                                                            | C <sub>32</sub> H <sub>64</sub> NO <sub>6</sub> P                           |            | 0.640 | 0.083 | 1.213 |
| Serum | hot vs. normal; RA vs. normal                                | 854.570 | 816.588 | 0.770 | PC(P-18:1(9Z))/22:6(4Z,7Z,10Z,13Z,16Z                                                                | C <sub>48</sub> H <sub>82</sub> NO <sub>7</sub> P                           |            | 0.645 | 0.127 | 1.022 |
| Serum | cold vs. normal                                              | 836.710 | 762.579 | 0.770 | GlcADG 32:0 GlcADG 15:0-17:0 GlcADC <sub>41</sub>                                                    | H <sub>76</sub> O <sub>11</sub>                                             |            | 0.650 | 0.356 | 1.021 |
| Serum | cold vs. normal; hot vs. normal; RA vs. normal; cold vs. hot | 872.920 | 745.588 | 0.770 | PE-Cer(d15:2(4E,6E)/24:0(2OH))                                                                       | C <sub>41</sub> H <sub>81</sub> N <sub>2</sub> O <sub>7</sub> P             |            | 0.521 | 0.204 | 1.171 |
| Serum | cold vs. normal; hot vs. normal; RA vs. normal; cold vs. hot | 657.200 | 686.356 | 0.760 | Avadharidine Aconitane-7,8-diol, 4-(((2-                                                             | C <sub>36</sub> H <sub>51</sub> N <sub>3</sub> O <sub>10</sub>              | 509-16-0   | 2.149 | 0.036 | 1.805 |
| Serum | hot vs. normal                                               | 91.830  | 338.050 | 0.760 | Famotidine                                                                                           | C <sub>8</sub> H <sub>15</sub> N <sub>7</sub> O <sub>2</sub> S <sub>3</sub> | 76824-35-6 | 1.174 | 0.628 | 1.106 |
| Serum | cold vs. hot; hot vs. normal; cold vs. normal; RA vs. normal | 372.760 | 314.231 | 0.760 | 9-Decenoylcarnitine                                                                                  | C <sub>17</sub> H <sub>31</sub> NO <sub>4</sub>                             |            | 2.294 | 0.071 | 1.737 |
| Serum | cold vs. hot; hot vs. normal; cold vs. normal; RA vs. normal | 635.380 | 816.701 | 0.760 | HexCer-ADS d41:0 HexCer-ADS d27:0/                                                                   | C <sub>47</sub> H <sub>93</sub> NO <sub>9</sub>                             |            | 0.554 | 0.201 | 1.136 |
| Serum | cold vs. hot; hot vs. normal; cold vs. normal; RA vs. normal | 782.550 | 706.584 | 0.760 | PC(O-16:0/15:0)                                                                                      | C <sub>39</sub> H <sub>80</sub> NO <sub>7</sub> P                           |            | 1.399 | 0.292 | 1.041 |
| Serum | cold vs. hot; hot vs. normal; cold vs. normal; RA vs. normal | 393.130 | 387.179 | 0.760 | Burseran (+) -Burseran                                                                               | C <sub>22</sub> H <sub>26</sub> O <sub>6</sub>                              | 23284-23-3 | 1.318 | 0.078 | 1.154 |
| Serum | cold vs. hot                                                 | 296.840 | 186.148 | 1.000 | N-methyl-Gabapentin                                                                                  | C <sub>10</sub> H <sub>19</sub> NO <sub>2</sub>                             | 102937-74- | 0.286 | 0.236 | 1.126 |
| Serum | hot vs. normal                                               | 896.030 | 719.576 | 0.750 | PE-Cer(d15:1(4E)/22:0(2OH))                                                                          | C <sub>39</sub> H <sub>79</sub> N <sub>2</sub> O <sub>7</sub> P             |            | 0.419 | 0.035 | 1.316 |
| Serum | hot vs. normal                                               | 472.780 | 506.360 | 0.750 | LysoPC(P-18:1(9Z)) PC(P-18:1(9Z)/0:0)                                                                | C <sub>26</sub> H <sub>52</sub> NO <sub>6</sub> P                           |            | 0.756 | 0.195 | 1.049 |
| Serum | RA vs. normal                                                | 696.330 | 816.702 | 0.750 | HexCer-ADS d41:0 HexCer-ADS d21:0/                                                                   | C <sub>47</sub> H <sub>93</sub> NO <sub>9</sub>                             |            | 0.525 | 0.091 | 1.017 |
| Serum | hot vs. normal; RA vs. normal; cold vs. hot                  | 819.850 | 844.524 | 0.740 | Scytophycin D                                                                                        | C <sub>45</sub> H <sub>75</sub> NO <sub>12</sub>                            |            | 0.661 | 0.054 | 1.213 |
| Serum | hot vs. normal; RA vs. normal; cold vs. hot                  | 855.700 | 746.595 | 0.740 | DGTS 35:4 DGTS 19:1-16:3                                                                             | C <sub>45</sub> H <sub>79</sub> NO <sub>7</sub>                             |            | 1.729 | 0.175 | 1.654 |

|       |                                                              |          |         |       |                                                                          |                                                                 |             |       |       |       |
|-------|--------------------------------------------------------------|----------|---------|-------|--------------------------------------------------------------------------|-----------------------------------------------------------------|-------------|-------|-------|-------|
| Serum | cold vs. hot                                                 | 567.960  | 264.240 | 0.740 | 1,7-Dimethyl-7-(4-methyl-3-penten-1-yl)C <sub>15</sub> H <sub>26</sub> O | 0.334                                                           | 0.196       | 1.463 |       |       |
| Serum | cold vs. normal; hot vs. normal; RA vs. normal               | 894.240  | 825.559 | 0.740 | MGDG 38:6                                                                | C <sub>47</sub> H <sub>78</sub> O <sub>10</sub>                 | 0.112       | 0.066 | 1.589 |       |
| Serum | hot vs. normal                                               | 153.410  | 349.183 | 1.000 | Enalaprilat Enalaprilate                                                 | C <sub>18</sub> H <sub>24</sub> N <sub>2</sub> O <sub>5</sub>   | 76420-72-9  | 0.475 | 0.160 | 1.158 |
| Serum | cold vs. normal; hot vs. normal; RA vs. normal; cold vs. hot | 855.080  | 745.619 | 0.740 | SM d37:1 SM d18:1/19:0 SM(d18:1/19:0)                                    | C <sub>42</sub> H <sub>85</sub> N <sub>2</sub> O <sub>6</sub> P | 0.726       | 0.337 | 1.022 |       |
| Serum | cold vs. normal; hot vs. normal; RA vs. normal; cold vs. hot | 379.960  | 583.254 | 0.740 | Biliverdin                                                               | C <sub>33</sub> H <sub>34</sub> N <sub>4</sub> O <sub>6</sub>   | 114-25-0    | 0.424 | 0.046 | 1.222 |
| Serum | cold vs. normal; hot vs. normal; RA vs. normal; cold vs. hot | 566.520  | 652.443 | 0.740 | PE 31:6e PE 22:6e/9:0 EtherPE 31:6e PE                                   | C <sub>36</sub> H <sub>62</sub> NO <sub>7</sub> P               | 1.412       | 0.133 | 1.406 |       |
| Serum | cold vs. normal; hot vs. normal; RA vs. normal; cold vs. hot | 810.810  | 820.524 | 0.740 | SQDG 33:3 SQDG 14:1-19:2 SQDG(14:                                        | C <sub>42</sub> H <sub>74</sub> O <sub>12</sub> S               | 0.588       | 0.079 | 1.571 |       |
| Serum | cold vs. normal; hot vs. normal; RA vs. normal; cold vs. hot | 866.340  | 790.570 | 0.740 | plasmeyl-PC 36:3                                                         | C <sub>44</sub> H <sub>82</sub> NO <sub>7</sub> P               | 0.437       | 0.130 | 1.400 |       |
| Serum | cold vs. normal; hot vs. normal; RA vs. normal; cold vs. hot | 1072.260 | 814.687 | 0.730 | TAG 48:5 TAG 13:0-15:0-20:5 TG 48:5                                      | C <sub>51</sub> H <sub>88</sub> O <sub>6</sub>                  | 1.485       | 0.319 | 1.083 |       |
| Serum | cold vs. normal; hot vs. normal; RA vs. normal; cold vs. hot | 277.610  | 352.164 | 1.000 | O-β-D-Xylosylzeatin O-β-D-Xyloxylzeati                                   | C <sub>15</sub> H <sub>21</sub> N <sub>5</sub> O <sub>5</sub>   | 0.525       | 0.250 | 1.359 |       |
| Serum | cold vs. hot                                                 | 687.060  | 343.263 | 0.730 | 4,7,10,13,16,19-Docosahexaenoic acid m                                   | C <sub>23</sub> H <sub>34</sub> O <sub>2</sub>                  | 2566-90-7   | 1.397 | 0.431 | 1.067 |
| Serum | hot vs. normal                                               | 893.650  | 824.555 | 0.730 | C18-OH Sulfatide                                                         | C <sub>42</sub> H <sub>81</sub> NO <sub>12</sub> S              | 0.288       | 0.004 | 1.663 |       |
| Serum | cold vs. normal                                              | 835.360  | 796.524 | 0.730 | C16-OH Sulfatide                                                         | C <sub>40</sub> H <sub>77</sub> NO <sub>12</sub> S              | 0.180       | 0.062 | 1.586 |       |
| Serum | cold vs. hot                                                 | 577.380  | 489.354 | 0.730 | Euscaphic acid                                                           | C <sub>30</sub> H <sub>48</sub> O <sub>5</sub>                  | 53155-25-2  | 1.537 | 0.173 | 1.302 |
| Serum | cold vs. hot; hot vs. normal; RA vs. normal                  | 943.770  | 773.648 | 0.730 | PA(O-20:0/22:1(11Z))                                                     | C <sub>45</sub> H <sub>89</sub> O <sub>7</sub> P                | 0.251       | 0.031 | 1.939 |       |
| Serum | cold vs. hot                                                 | 1149.000 | 872.768 | 0.730 | TG 52:4                                                                  | C <sub>55</sub> H <sub>98</sub> O <sub>6</sub>                  | 0.393       | 0.265 | 1.183 |       |
| Serum | cold vs. hot                                                 | 807.580  | 383.366 | 0.730 | Campesterol CAMPESTEROL (24R)-ER                                         | C <sub>28</sub> H <sub>48</sub> O                               | 474-62-4    | 1.348 | 0.158 | 1.402 |
| Serum | cold vs. hot; cold vs. normal; hot vs. normal; RA vs. normal | 725.810  | 816.701 | 0.720 | HexCer-NP t41:0 HexCer-NP t18:0/23:0                                     | C <sub>47</sub> H <sub>93</sub> NO <sub>9</sub>                 | 0.341       | 0.181 | 1.259 |       |
| Serum | cold vs. hot                                                 | 453.720  | 265.142 | 0.720 | Coronopilin                                                              | C <sub>15</sub> H <sub>20</sub> O <sub>4</sub>                  | 2571-81-5   | 1.959 | 0.125 | 1.397 |
| Serum | cold vs. normal; hot vs. normal; RA vs. normal; cold vs. hot | 127.570  | 167.089 | 0.720 | 2-methyl-3-Pyrimidin-2-yl-Propionic Aci                                  | C <sub>8</sub> H <sub>10</sub> N <sub>2</sub> O <sub>2</sub>    | 1.578       | 0.010 | 2.047 |       |
| Serum | cold vs. normal; hot vs. normal; RA vs. normal; cold vs. hot | 984.270  | 814.686 | 0.720 | HexCer-NP t41:1 HexCer-NP t21:1/20:0                                     | C <sub>47</sub> H <sub>91</sub> NO <sub>9</sub>                 | 0.378       | 0.030 | 1.357 |       |
| Serum | cold vs. normal; hot vs. normal; RA vs. normal; cold vs. hot | 846.740  | 783.636 | 0.720 | SM 38:0 SM(d16:0/22:0)                                                   | C <sub>43</sub> H <sub>89</sub> N <sub>2</sub> O <sub>6</sub> P | 1.308       | 0.217 | 1.236 |       |
| Serum | cold vs. normal                                              | 478.000  | 592.335 | 0.720 | lysoPC 22:5                                                              | C <sub>30</sub> H <sub>52</sub> NO <sub>7</sub> P               | 0.666       | 0.159 | 1.257 |       |
| Serum | cold vs. hot                                                 | 652.210  | 491.369 | 0.720 | Ganoderiol H                                                             | C <sub>30</sub> H <sub>50</sub> O <sub>5</sub>                  | 114612-72-2 | 2.029 | 0.049 | 1.727 |
| Serum | cold vs. normal                                              | 452.890  | 368.278 | 1.000 | 3, 5-Tetradecadiencarnitine                                              | C <sub>21</sub> H <sub>37</sub> NO <sub>4</sub>                 | 1.763       | 0.262 | 1.007 |       |
| Serum | cold vs. normal                                              | 618.420  | 421.330 | 0.710 | 6-Ethylchenodeoxycholic acid 6-ECDCA                                     | C <sub>26</sub> H <sub>44</sub> O <sub>4</sub>                  | 459789-99-2 | 2.201 | 0.066 | 1.709 |
| Serum | cold vs. hot; cold vs. normal; hot vs. normal; RA vs. normal | 635.590  | 244.190 | 0.710 | 2-(7-hydroxy-6-methyloctyl)-2H-furan-5-                                  | C <sub>13</sub> H <sub>22</sub> O <sub>3</sub>                  | 1.577       | 0.006 | 2.214 |       |
| Serum | cold vs. hot; cold vs. normal; hot vs. normal; RA vs. normal | 706.340  | 295.263 | 0.710 | 9,12-Octadecadienoic acid (Z,Z)-, methyl                                 | C <sub>19</sub> H <sub>34</sub> O <sub>2</sub>                  | 112-63-0    | 0.771 | 0.094 | 1.088 |
| Serum | cold vs. normal                                              | 1328.020 | 801.683 | 0.710 | SM(d17:1/24:0)                                                           | C <sub>46</sub> H <sub>93</sub> N <sub>2</sub> O <sub>6</sub> P | 1.168       | 0.302 | 1.047 |       |
| Serum | cold vs. hot                                                 | 914.930  | 744.588 | 0.710 | 1-Hexadecanoyl-2-(9Z-octadecenoyl)-sn-                                   | C <sub>42</sub> H <sub>83</sub> NO <sub>7</sub> P               | 1.480       | 0.162 | 1.296 |       |
| Serum | cold vs. normal                                              | 1020.540 | 369.351 | 1.000 | Lathosterol 5α-Cholest-7-en-3β-ol                                        | C <sub>27</sub> H <sub>46</sub> O                               | 80-99-9     | 3.493 | 0.159 | 1.292 |
| Serum | hot vs. normal                                               | 723.770  | 284.295 | 0.710 | Stearamide                                                               |                                                                 | 1.220       | 0.089 | 1.112 |       |
| Serum | cold vs. hot; hot vs. normal; RA vs. normal; cold vs. normal | 941.720  | 774.653 | 0.700 | HexCer-ADS d38:0 HexCer-ADS d25:0/                                       | C <sub>44</sub> H <sub>87</sub> NO <sub>9</sub>                 | 0.485       | 0.154 | 1.559 |       |
| Serum | cold vs. hot; hot vs. normal; RA vs. normal; cold vs. normal | 566.520  | 651.440 | 0.700 | Progesterone                                                             |                                                                 | 1.385       | 0.167 | 1.294 |       |
| Serum | cold vs. hot; hot vs. normal; RA vs. normal; cold vs. normal | 1000.540 | 650.643 | 0.700 | N-Lignoceroylsphingosine                                                 | C <sub>42</sub> H <sub>83</sub> NO <sub>3</sub>                 | 34435-05-7  | 0.510 | 0.123 | 1.544 |

|       |                                                              |          |         |       |                                                            |                                                                 |               |       |       |       |
|-------|--------------------------------------------------------------|----------|---------|-------|------------------------------------------------------------|-----------------------------------------------------------------|---------------|-------|-------|-------|
| Serum | cold vs. hot                                                 | 582.120  | 419.314 | 0.700 | (24R)-1 $\alpha$ ,24-dihydroxy-22-oxavitamin E             | C <sub>26</sub> H <sub>42</sub> O <sub>4</sub>                  | 1.526         | 0.300 | 1.031 |       |
| Serum | hot vs. normal; RA vs. normal                                | 1107.190 | 870.753 | 0.700 | TG 52:5                                                    | C <sub>55</sub> H <sub>96</sub> O <sub>6</sub>                  | 2.027         | 0.059 | 1.244 |       |
| Serum | cold vs. normal                                              | 127.570  | 120.080 | 0.700 | Indoline                                                   | C <sub>8</sub> H <sub>9</sub> N                                 | 496-15-1      | 1.382 | 0.031 | 1.778 |
| Serum | cold vs. hot                                                 | 612.660  | 281.247 | 0.690 | $\beta$ -Linoleic acid                                     | C <sub>18</sub> H <sub>32</sub> O <sub>2</sub>                  | 60-33-3       | 2.312 | 0.013 | 2.007 |
| Serum | cold vs. hot                                                 | 686.280  | 463.377 | 0.690 | 2 $\alpha$ -(3-Hydroxypropyl)-1 $\alpha$ ,25-dihydroxy     | C <sub>29</sub> H <sub>50</sub> O <sub>4</sub>                  |               | 1.487 | 0.295 | 1.153 |
| Serum | cold vs. normal                                              | 757.610  | 773.615 | 0.690 | PA(21:0/20:1(11Z))                                         | C <sub>44</sub> H <sub>85</sub> O <sub>8</sub> P                |               | 1.747 | 0.192 | 1.157 |
| Serum | cold vs. normal; hot vs. normal; RA vs. normal               | 891.600  | 759.635 | 0.690 | SM(d18:1/20:0)                                             | C <sub>43</sub> H <sub>87</sub> N <sub>2</sub> O <sub>6</sub> P |               | 0.384 | 0.023 | 1.878 |
| Serum | cold vs. hot                                                 | 760.260  | 323.293 | 0.690 | Heneicosapentaenoic Acid-d6                                | C <sub>21</sub> H <sub>26</sub> D <sub>6</sub> O <sub>2</sub>   |               | 1.337 | 0.419 | 1.014 |
| Serum | cold vs. hot; hot vs. normal; RA vs. normal; cold vs. normal | 903.400  | 785.652 | 0.680 | SM(d16:1/24:1(15Z))                                        | C <sub>45</sub> H <sub>89</sub> N <sub>2</sub> O <sub>6</sub> P |               | 0.522 | 0.028 | 1.950 |
| Serum | cold vs. hot; hot vs. normal; RA vs. normal; cold vs. normal | 708.120  | 771.599 | 0.680 | PA(19:0/22:2(13Z,16Z))                                     | C <sub>44</sub> H <sub>83</sub> O <sub>8</sub> P                |               | 2.273 | 0.001 | 2.346 |
| Serum | cold vs. hot                                                 | 571.850  | 374.301 | 1.000 | Arachidonoylmorpholine                                     | C <sub>24</sub> H <sub>39</sub> NO <sub>2</sub>                 |               | 1.554 | 0.272 | 1.431 |
| Serum | cold vs. hot; RA vs. normal; hot vs. normal; cold vs. normal | 576.040  | 256.264 | 0.670 | Altretamine                                                |                                                                 |               | 0.605 | 0.009 | 2.073 |
| Serum | cold vs. hot; RA vs. normal; hot vs. normal; cold vs. normal | 490.790  | 318.299 | 0.670 | Phytosphingosine 4-D-Hydroxysphingani                      | C <sub>18</sub> H <sub>39</sub> NO <sub>3</sub>                 | 554-62-1      | 0.344 | 0.263 | 1.094 |
| Serum | cold vs. hot; RA vs. normal; hot vs. normal; cold vs. normal | 569.110  | 814.687 | 0.670 | HexCer-NP t41:1 HexCer-NP t24:1/17:0                       | C <sub>47</sub> H <sub>91</sub> NO <sub>9</sub>                 |               | 0.461 | 0.232 | 1.227 |
| Serum | cold vs. hot; RA vs. normal; hot vs. normal; cold vs. normal | 452.220  | 200.200 | 0.660 | Dodecanamide dodecanamide                                  | C <sub>12</sub> H <sub>25</sub> NO                              |               | 0.390 | 0.021 | 2.015 |
| Serum | cold vs. hot; RA vs. normal; hot vs. normal; cold vs. normal | 656.630  | 341.304 | 0.660 | Glycidyl stearate                                          | C <sub>21</sub> H <sub>40</sub> O <sub>3</sub>                  | 7460-84-6     | 0.291 | 0.311 | 1.122 |
| Serum | cold vs. hot; RA vs. normal; hot vs. normal; cold vs. normal | 830.080  | 397.382 | 0.660 | $\beta$ -Sitosterol Sitosterol Harzol (TN)  $\gamma$ -Sito | C <sub>29</sub> H <sub>50</sub> O                               | 83-46-5 83-   | 1.545 | 0.394 | 1.084 |
| Serum | cold vs. hot; RA vs. normal; hot vs. normal; cold vs. normal | 701.040  | 745.583 | 0.660 | PA(21:0/18:1(9Z))                                          | C <sub>42</sub> H <sub>81</sub> O <sub>8</sub> P                |               | 2.097 | 0.012 | 2.026 |
| Serum | cold vs. hot                                                 | 941.310  | 780.587 | 0.660 | PE(22:4(7Z,10Z,13Z,16Z)/P-18:0)                            | C <sub>45</sub> H <sub>82</sub> NO <sub>7</sub> P               |               | 0.151 | 0.218 | 1.186 |
| Serum | cold vs. hot; hot vs. normal; RA vs. normal; cold vs. normal | 846.950  | 861.667 | 0.660 | PG(20:1(11Z)/22:0)                                         | C <sub>48</sub> H <sub>93</sub> O <sub>10</sub> P               |               | 1.489 | 0.192 | 1.245 |
| Serum | cold vs. hot; hot vs. normal; RA vs. normal; cold vs. normal | 607.870  | 305.247 | 0.660 | Mesterolone                                                | C <sub>20</sub> H <sub>32</sub> O <sub>2</sub>                  | 1424-00-6     | 1.872 | 0.096 | 1.499 |
| Serum | cold vs. hot                                                 | 556.730  | 376.317 | 1.000 | N-(1,1-dimethyl-2-hydroxy-ethyl) arachidic                 | C <sub>24</sub> H <sub>41</sub> NO <sub>2</sub>                 |               | 1.264 | 0.373 | 1.099 |
| Serum | cold vs. hot; cold vs. normal                                | 603.700  | 585.269 | 0.650 | Bilirubin 4E,15Z-Bilirubin IXa                             | C <sub>33</sub> H <sub>36</sub> N <sub>4</sub> O <sub>6</sub>   | 635-65-4 69.0 | 0.706 | 0.240 | 1.554 |
| Serum | cold vs. normal                                              | 789.680  | 815.698 | 0.650 | SM(d18:0/24:1(15Z))                                        | C <sub>47</sub> H <sub>95</sub> N <sub>2</sub> O <sub>6</sub> P |               | 0.527 | 0.282 | 1.045 |
| Serum | cold vs. hot; RA vs. normal                                  | 142.200  | 193.101 | 0.650 | Cotinine N-oxide                                           | C <sub>10</sub> H <sub>12</sub> N <sub>2</sub> O <sub>2</sub>   | 36508-80-2    | 0.676 | 0.351 | 1.079 |
| Serum | cold vs. hot                                                 | 574.200  | 378.268 | 1.000 | Karakoline Aconitane-1,8,14-triol, 20-eth                  | C <sub>22</sub> H <sub>35</sub> NO <sub>4</sub>                 | 39089-30-0    | 0.682 | 0.264 | 1.177 |
| Serum | cold vs. hot                                                 | 858.250  | 809.651 | 0.650 | SM 40:1                                                    | C <sub>45</sub> H <sub>91</sub> N <sub>2</sub> O <sub>6</sub> P |               | 1.547 | 0.040 | 1.853 |
| Serum | hot vs. normal                                               | 343.240  | 226.180 | 0.650 | (8S,Z)-6-((S)-3-hydroxy-2-methylpropyl)                    | C <sub>13</sub> H <sub>23</sub> NO <sub>2</sub>                 |               | 1.699 | 0.003 | 1.713 |
| Serum | cold vs. normal; RA vs. normal; cold vs. hot; hot vs. normal | 786.200  | 767.544 | 0.640 | Finasteride                                                |                                                                 |               | 0.643 | 0.259 | 1.029 |
| Serum | cold vs. normal; RA vs. normal; cold vs. hot; hot vs. normal | 700.970  | 746.587 | 0.640 | MGDG 32:1                                                  | C <sub>41</sub> H <sub>76</sub> O <sub>10</sub>                 |               | 2.492 | 0.007 | 2.109 |
| Serum | cold vs. normal; RA vs. normal; cold vs. hot; hot vs. normal | 657.460  | 359.314 | 0.640 | Hexadecyl Acetyl Glycerol                                  | C <sub>21</sub> H <sub>42</sub> O <sub>4</sub>                  | 77133-35-8    | 0.257 | 0.318 | 1.118 |
| Serum | cold vs. normal; RA vs. normal; cold vs. hot; hot vs. normal | 840.230  | 757.619 | 0.640 | SM d38:2 SM d15:2/23:0 SM(d15:2/23:0                       | C <sub>43</sub> H <sub>85</sub> N <sub>2</sub> O <sub>6</sub> P |               | 0.512 | 0.056 | 1.620 |
| Serum | cold vs. hot                                                 | 585.980  | 405.299 | 0.640 | MG(22:5(7Z,10Z,13Z,16Z,19Z)/0:0/0:0)                       | C <sub>25</sub> H <sub>40</sub> O <sub>4</sub>                  |               | 0.586 | 0.337 | 1.260 |
| Serum | cold vs. hot                                                 | 351.790  | 466.315 | 0.640 | Glycocholic acid                                           | C <sub>26</sub> H <sub>43</sub> NO <sub>6</sub>                 | 475-31-0      | 0.243 | 0.299 | 1.064 |
| Serum | cold vs. normal                                              | 271.570  | 315.159 | 0.640 | Clomipramine Clomipramine (INN) Anaf                       | C <sub>19</sub> H <sub>23</sub> ClN <sub>2</sub>                | 303-49-1      | 1.558 | 0.258 | 1.072 |

|       |                                                               |          |         |       |                                            |                                                                 |             |       |       |       |
|-------|---------------------------------------------------------------|----------|---------|-------|--------------------------------------------|-----------------------------------------------------------------|-------------|-------|-------|-------|
| Serum | cold vs. hot; hot vs. normal; RA vs. normal; cold vs. normal  | 358.040  | 586.273 | 0.640 | PS 20:2 PS 3:0-17:2 PS(3:0/17:2)           | C <sub>26</sub> H <sub>46</sub> NO <sub>10</sub> P              | 1.980       | 0.281 | 1.042 |       |
| Serum | cold vs. hot; hot vs. normal; RA vs. normal; cold vs. normal  | 826.180  | 754.587 | 0.640 | HexCer-AS d37:3 HexCer-AS d21:1/16:2       | C <sub>43</sub> H <sub>79</sub> NO <sub>9</sub>                 | 1.670       | 0.218 | 1.610 |       |
| Serum | cold vs. hot                                                  | 167.010  | 393.209 | 1.000 | Dexamethasone                              | C <sub>22</sub> H <sub>29</sub> FO <sub>5</sub>                 | 1950/2/2    | 3.947 | 0.183 | 1.266 |
| Serum | cold vs. normal; hot vs. normal; RA vs. normal                | 610.970  | 814.686 | 0.640 | HexCer-AS d41:1 HexCer-AS d21:1/20:1       | C <sub>47</sub> H <sub>91</sub> NO <sub>9</sub>                 | 0.426       | 0.131 | 1.315 |       |
| Serum | cold vs. normal                                               | 626.150  | 445.330 | 0.630 | (3β,5α,6β,9α,22E,24R)-5,9-Epidioxysteroid  | C <sub>28</sub> H <sub>44</sub> O <sub>4</sub>                  | 348611-57-1 | 1.417 | 0.263 | 1.163 |
| Serum | cold vs. hot; cold vs. normal                                 | 1328.190 | 813.683 | 0.630 | SM(d18:1/24:1(15Z))                        | C <sub>47</sub> H <sub>93</sub> N <sub>2</sub> O <sub>6</sub> P | 1.212       | 0.155 | 1.402 |       |
| Serum | RA vs. normal                                                 | 713.640  | 717.552 | 0.630 | PA(15:0/22:1(11Z))                         | C <sub>40</sub> H <sub>77</sub> O <sub>8</sub> P                | 0.835       | 0.155 | 1.019 |       |
| Serum | cold vs. normal; hot vs. normal; RA vs. normal; cold vs. hot  | 943.990  | 646.612 | 0.630 | Cer-NS d42:3; Cer-NS d19:3/23:0            | C <sub>42</sub> H <sub>79</sub> NO <sub>3</sub>                 | 0.584       | 0.020 | 1.898 |       |
| Serum | cold vs. normal; hot vs. normal; RA vs. normal; cold vs. hot  | 614.500  | 401.344 | 1.000 | 7-Ketocholesterol                          | C <sub>27</sub> H <sub>44</sub> O <sub>2</sub>                  | 566-28-9    | 2.255 | 0.053 | 1.711 |
| Serum | cold vs. normal                                               | 832.870  | 805.554 | 0.630 | NBD-Stearoyl-2-Arachidonoyl-sn-glycerol    | C <sub>47</sub> H <sub>74</sub> N <sub>4</sub> O <sub>8</sub>   | 0.712       | 0.517 | 1.058 |       |
| Serum | cold vs. hot; cold vs. normal; hot vs. normal; RA vs. normal  | 753.040  | 719.568 | 0.630 | PA(15:0/22:0)                              | C <sub>40</sub> H <sub>79</sub> O <sub>8</sub> P                | 0.842       | 0.580 | 1.066 |       |
| Serum | cold vs. hot; cold vs. normal; hot vs. normal; RA vs. normal  | 1116.860 | 896.768 | 0.630 | TG 54:6                                    | C <sub>57</sub> H <sub>98</sub> O <sub>6</sub>                  | 2.612       | 0.032 | 1.351 |       |
| Serum | cold vs. hot; cold vs. normal; hot vs. normal; RA vs. normal  | 796.870  | 717.589 | 0.630 | PA(O-18:0/20:1(11Z))                       | C <sub>41</sub> H <sub>81</sub> O <sub>7</sub> P                | 0.722       | 0.040 | 1.814 |       |
| Serum | cold vs. hot                                                  | 427.840  | 291.271 | 0.620 | Aphidicolan-16β-ol aphidicolan-16β-ol      | C <sub>20</sub> H <sub>34</sub> O                               | 101143-85-0 | 0.489 | 0.298 | 1.012 |
| Serum | cold vs. hot; RA vs. normal; cold vs. hot; cold vs. normal    | 758.750  | 463.377 | 0.620 | (3β,22R,23R,24S)-3,22,23-Trihydroxysteroid | C <sub>29</sub> H <sub>50</sub> O <sub>4</sub>                  | 90524-90-6  | 1.560 | 0.300 | 1.169 |
| Serum | cold vs. hot; RA vs. normal; cold vs. hot; cold vs. normal    | 753.110  | 720.571 | 0.610 | MGDG 30:0                                  | C <sub>39</sub> H <sub>74</sub> O <sub>10</sub>                 | 0.854       | 0.614 | 1.054 |       |
| Serum | cold vs. hot                                                  | 1130.860 | 922.783 | 0.610 | TG 56:7                                    | C <sub>59</sub> H <sub>100</sub> O <sub>6</sub>                 | 0.385       | 0.300 | 1.110 |       |
| Serum | hot vs. normal; RA vs. normal                                 | 786.680  | 729.589 | 0.610 | N-Oleoyl-D-sphingomyelin                   | C <sub>41</sub> H <sub>81</sub> N <sub>2</sub> O <sub>6</sub> P | 108392-10-0 | 0.764 | 0.068 | 1.146 |
| Serum | cold vs. hot                                                  | 567.790  | 263.236 | 0.610 | 2-(5,8-Tetradecadienyl)cyclobutanone       | C <sub>18</sub> H <sub>30</sub> O                               | 152245-81-0 | 0.376 | 0.156 | 1.392 |
| Serum | cold vs. hot; hot vs. normal; RA vs. normal; cold vs. normal  | 496.310  | 298.273 | 0.610 | 3-ketosphingosine                          | C <sub>18</sub> H <sub>35</sub> NO <sub>2</sub>                 | 0.393       | 0.107 | 1.484 |       |
| Serum | cold vs. hot; hot vs. normal; RA vs. normal; cold vs. normal  | 974.570  | 789.675 | 0.610 | SM(d18:0/22:0)                             | C <sub>45</sub> H <sub>93</sub> N <sub>2</sub> O <sub>6</sub> P | 0.396       | 0.278 | 1.166 |       |
| Serum | cold vs. hot; hot vs. normal; RA vs. normal; cold vs. normal  | 629.840  | 447.345 | 0.600 | 3-Dehydroteasterone                        | C <sub>28</sub> H <sub>46</sub> O <sub>4</sub>                  | 1.595       | 0.218 | 1.160 |       |
| Serum | cold vs. hot; hot vs. normal; RA vs. normal; cold vs. normal  | 548.430  | 636.421 | 0.600 | SM d28:3 SM d16:3/12:0 SM(d16:3/12:0)      | C <sub>33</sub> H <sub>63</sub> N <sub>2</sub> O <sub>6</sub> P | 1.683       | 0.100 | 1.597 |       |
| Serum | cold vs. hot; hot vs. normal; RA vs. normal; cold vs. normal  | 888.330  | 760.638 | 0.600 | HexCer-ADS d37:0 HexCer-ADS d19:0/         | C <sub>43</sub> H <sub>85</sub> NO <sub>9</sub>                 | 0.337       | 0.076 | 1.516 |       |
| Serum | cold vs. hot                                                  | 907.970  | 811.667 | 0.600 | SM 40:0                                    | C <sub>45</sub> H <sub>93</sub> N <sub>2</sub> O <sub>6</sub> P | 1.618       | 0.280 | 1.193 |       |
| Serum | hot vs. normal; RA vs. normal; cold vs. hot; cold vs. normal  | 1219.750 | 848.769 | 0.600 | TG 50:2                                    | C <sub>53</sub> H <sub>98</sub> O <sub>6</sub>                  | 1.889       | 0.128 | 1.240 |       |
| Serum | hot vs. normal; RA vs. normal; cold vs. hot; cold vs. normal  | 1328.310 | 787.667 | 0.590 | SM d40:1 SM d24:1/16:0 SM(d24:1/16:0)      | C <sub>45</sub> H <sub>91</sub> N <sub>2</sub> O <sub>6</sub> P | 0.730       | 0.234 | 1.304 |       |
| Serum | cold vs. hot                                                  | 324.550  | 200.164 | 1.000 | 11-nitro-1-undecene                        | C <sub>11</sub> H <sub>21</sub> NO <sub>2</sub>                 | 0.311       | 0.250 | 1.094 |       |
| Serum | hot vs. normal; RA vs. normal; cold vs. normal; RA vs. normal | 797.540  | 719.596 | 0.590 | PA(O-18:0/20:0)                            | C <sub>41</sub> H <sub>83</sub> O <sub>7</sub> P                | 0.683       | 0.006 | 1.603 |       |
| Serum | hot vs. normal; RA vs. normal; cold vs. normal; RA vs. normal | 486.430  | 440.312 | 0.590 | PE(O-16:0/0:0)                             | C <sub>21</sub> H <sub>46</sub> NO <sub>6</sub> P               | 1.491       | 0.150 | 1.262 |       |
| Serum | cold vs. hot                                                  | 524.020  | 230.174 | 0.590 | 2-(6-hydroxy-6-methylheptyl)-2H-furan-     | C <sub>12</sub> H <sub>20</sub> O <sub>3</sub>                  | 0.387       | 0.163 | 1.296 |       |
| Serum | hot vs. normal                                                | 435.630  | 500.275 | 0.590 | lysoPE 18:2                                | C <sub>23</sub> H <sub>44</sub> NO <sub>7</sub> P               | 1.611       | 0.141 | 1.001 |       |
| Serum | RA vs. normal                                                 | 692.410  | 449.361 | 0.580 | Typhasterol 2-Deoxycastasterone            | C <sub>28</sub> H <sub>48</sub> O <sub>4</sub>                  | 87734-68-7  | 1.516 | 0.122 | 1.034 |
| Serum | cold vs. hot                                                  | 704.960  | 862.624 | 0.580 | Lactosylceramide (d18:1/16:0) C16 Lact     | C <sub>46</sub> H <sub>87</sub> NO <sub>13</sub>                | 0.906       | 0.664 | 1.001 |       |

|       |                                                              |          |         |       |                                                     |                                                                                              |             |       |       |       |
|-------|--------------------------------------------------------------|----------|---------|-------|-----------------------------------------------------|----------------------------------------------------------------------------------------------|-------------|-------|-------|-------|
| Serum | cold vs. normal                                              | 707.220  | 405.371 | 0.580 | 5 $\alpha$ -Cholestan-5 $\alpha$ ,6 $\beta$ -diol   | C <sub>27</sub> H <sub>48</sub> O <sub>2</sub>                                               | 1.813       | 0.157 | 1.275 |       |
| Serum | cold vs. hot                                                 | 183.000  | 438.238 | 1.000 | Lunarine                                            | C <sub>25</sub> H <sub>31</sub> N <sub>3</sub> O <sub>4</sub>                                | 24185-51-1  | 3.346 | 0.223 | 1.198 |
| Serum | cold vs. hot; hot vs. normal; RA vs. normal                  | 357.870  | 585.270 | 0.580 | 4Z,15E-Bilirubin IXa                                | C <sub>33</sub> H <sub>36</sub> N <sub>4</sub> O <sub>6</sub>                                | 1.984       | 0.285 | 1.036 |       |
| Serum | hot vs. normal                                               | 983.500  | 813.684 | 0.570 | SM d42:2 SM d20:0/22:2 SM(d20:0/22:2                | C <sub>47</sub> H <sub>93</sub> N <sub>2</sub> O <sub>6</sub> P                              | 0.272       | 0.002 | 1.795 |       |
| Serum | cold vs. hot; hot vs. normal; RA vs. normal; cold vs. normal | 525.410  | 352.245 | 0.570 | Dutasteride                                         |                                                                                              | 0.459       | 0.173 | 1.330 |       |
| Serum | cold vs. hot; hot vs. normal; RA vs. normal; cold vs. normal | 472.850  | 548.358 | 0.570 | DGTS 21:5 DGTS 3:0-18:5 DGTS(3:0/1                  | C <sub>31</sub> H <sub>49</sub> NO <sub>7</sub>                                              | 1.372       | 0.303 | 1.066 |       |
| Serum | cold vs. hot; hot vs. normal; RA vs. normal; cold vs. normal | 942.720  | 799.667 | 0.570 | Levothyroxine sodium anhydrous Levoth               | C <sub>15</sub> H <sub>10</sub> I <sub>4</sub> NO <sub>4</sub> ·Na                           | 1955/3/8    | 3.257 | 0.128 | 1.326 |
| Serum | cold vs. hot; hot vs. normal; RA vs. normal; cold vs. normal | 695.730  | 815.698 | 0.560 | SM d42:1 SM d27:0/15:1 SM(d27:0/15:1                | C <sub>47</sub> H <sub>95</sub> N <sub>2</sub> O <sub>6</sub> P                              | 0.607       | 0.118 | 1.026 |       |
| Serum | hot vs. normal                                               | 183.880  | 453.209 | 1.000 | Dihydrogeranylgeranyl diphosphate                   | C <sub>20</sub> H <sub>38</sub> O <sub>7</sub> P <sub>2</sub>                                | 0.302       | 0.046 | 1.296 |       |
| Serum | cold vs. normal; hot vs. normal; RA vs. normal; cold vs. hot | 776.760  | 705.581 | 0.560 | SM(d18:0/16:0)                                      | C <sub>39</sub> H <sub>81</sub> N <sub>2</sub> O <sub>6</sub> P                              | 0.545       | 0.164 | 1.314 |       |
| Serum | cold vs. normal; hot vs. normal; RA vs. normal; cold vs. hot | 797.100  | 718.592 | 0.550 | HexCer-NP t34:0 HexCer-NP t22:0/12:0                | C <sub>40</sub> H <sub>79</sub> NO <sub>9</sub>                                              | 0.726       | 0.028 | 1.898 |       |
| Serum | cold vs. normal; hot vs. normal; RA vs. normal; cold vs. hot | 545.830  | 468.344 | 1.000 | lysoPE 18:0 PE(O-18:0/0:0)                          | C <sub>23</sub> H <sub>50</sub> NO <sub>6</sub> P                                            | 1.816       | 0.047 | 1.665 |       |
| Serum | cold vs. normal; hot vs. normal; RA vs. normal; cold vs. hot | 600.820  | 703.537 | 0.550 | PA(14:0/22:1(11Z))                                  | C <sub>39</sub> H <sub>75</sub> O <sub>8</sub> P                                             | 1.858       | 0.007 | 2.261 |       |
| Serum | cold vs. normal; hot vs. normal; RA vs. normal; cold vs. hot | 824.470  | 732.604 | 0.550 | HexCer-ADS d35:0 HexCer-ADS d18:0/                  | C <sub>41</sub> H <sub>81</sub> NO <sub>9</sub>                                              | 0.677       | 0.094 | 1.510 |       |
| Serum | cold vs. normal; hot vs. normal; RA vs. normal; cold vs. hot | 744.070  | 689.558 | 0.550 | PA(P-20:0/16:0)                                     | C <sub>39</sub> H <sub>77</sub> O <sub>7</sub> P                                             | 0.870       | 0.343 | 1.075 |       |
| Serum | cold vs. normal; hot vs. normal; RA vs. normal; cold vs. hot | 637.510  | 282.278 | 0.540 | Elaidamide                                          | C <sub>18</sub> H <sub>35</sub> NO                                                           | 4303-70-2   | 0.399 | 0.039 | 1.858 |
| Serum | cold vs. normal                                              | 682.100  | 519.403 | 0.540 | Ganoderiol C                                        | C <sub>32</sub> H <sub>54</sub> O <sub>5</sub>                                               | 114567-44-2 | 2.107 | 0.178 | 1.193 |
| Serum | cold vs. normal; hot vs. normal; cold vs. hot; RA vs. normal | 604.790  | 678.469 | 0.540 | SM d31:3 SM d18:2/13:1 SM(d18:2/13:1                | C <sub>36</sub> H <sub>69</sub> N <sub>2</sub> O <sub>6</sub> P                              | 1.536       | 0.090 | 1.484 |       |
| Serum | cold vs. normal; hot vs. normal; cold vs. hot; RA vs. normal | 534.580  | 172.132 | 0.540 | Gabapentin (Neurontin)                              |                                                                                              | 60142-96-3  | 0.416 | 0.178 | 1.283 |
| Serum | cold vs. normal; hot vs. normal; cold vs. hot; RA vs. normal | 1100.850 | 844.737 | 0.540 | TG 50:4                                             | C <sub>53</sub> H <sub>94</sub> O <sub>6</sub>                                               | 0.468       | 0.289 | 1.101 |       |
| Serum | hot vs. normal                                               | 504.900  | 466.327 | 0.540 | PE(O-18:1(9Z)/0:0)                                  | C <sub>23</sub> H <sub>48</sub> NO <sub>6</sub> P                                            | 1.372       | 0.137 | 1.202 |       |
| Serum | hot vs. normal; RA vs. normal                                | 612.100  | 339.288 | 0.540 | Glycidyl oleate                                     | C <sub>21</sub> H <sub>38</sub> O <sub>3</sub>                                               | 5431-33-4   | 0.594 | 0.063 | 1.344 |
| Serum | hot vs. normal                                               | 203.030  | 481.261 | 1.000 | Alangicine                                          | C <sub>28</sub> H <sub>36</sub> N <sub>2</sub> O <sub>5</sub>                                | 16531-04-7  | 0.379 | 0.080 | 1.277 |
| Serum | cold vs. normal; hot vs. normal; RA vs. normal               | 734.490  | 815.698 | 0.530 | SM d42:1 SM d14:1/28:0 SM(d14:1/28:0                | C <sub>47</sub> H <sub>95</sub> N <sub>2</sub> O <sub>6</sub> P                              | 0.350       | 0.020 | 1.900 |       |
| Serum | cold vs. normal; hot vs. normal; RA vs. normal               | 770.940  | 703.574 | 0.530 | SM(d18:0/16:1(9Z))                                  | C <sub>39</sub> H <sub>79</sub> N <sub>2</sub> O <sub>6</sub> P                              | 0.790       | 0.096 | 1.068 |       |
| Serum | cold vs. normal; hot vs. normal; RA vs. normal               | 142.200  | 211.131 | 0.530 | Cymather aldehyde methyl ester                      |                                                                                              | 1.337       | 0.063 | 1.171 |       |
| Serum | cold vs. normal                                              | 621.790  | 465.355 | 0.530 | Castasterone                                        | C <sub>28</sub> H <sub>48</sub> O <sub>5</sub>                                               | 80736-41-0  | 1.989 | 0.004 | 2.288 |
| Serum | cold vs. normal; hot vs. normal; RA vs. normal               | 695.860  | 801.683 | 0.530 | SM d41:1 SM d21:0/20:1 SM(d21:0/20:1                | C <sub>46</sub> H <sub>93</sub> N <sub>2</sub> O <sub>6</sub> P                              | 0.317       | 0.192 | 1.243 |       |
| Serum | cold vs. normal; hot vs. normal; RA vs. normal               | 433.200  | 379.313 | 0.530 | 5 $\beta$ -Cholane-3 $\alpha$ ,6 $\alpha$ ,24-triol | C <sub>24</sub> H <sub>42</sub> O <sub>3</sub>                                               | 1.279       | 0.077 | 1.138 |       |
| Serum | cold vs. normal; hot vs. normal; RA vs. normal               | 846.720  | 774.541 | 0.530 | PE(22:6(4Z,7Z,10Z,13Z,16Z,19Z)/P-18:                | C <sub>45</sub> H <sub>76</sub> NO <sub>7</sub> P                                            | 0.505       | 0.069 | 1.583 |       |
| Serum | hot vs. normal                                               | 90.360   | 348.079 | 0.530 | 2-Hydroxyzotepine                                   | C <sub>18</sub> H <sub>18</sub> ClNO <sub>2</sub> S                                          | 78105-26-7  | 1.355 | 0.303 | 1.106 |
| Serum | cold vs. normal                                              | 818.700  | 722.510 | 0.520 | plasmeryl-PE 36:5                                   | C <sub>41</sub> H <sub>72</sub> NO <sub>7</sub> P                                            | 0.431       | 0.254 | 1.056 |       |
| Serum | cold vs. normal                                              | 824.190  | 731.604 | 0.520 | Ubiquinol QH2 CoQH2                                 | C <sub>14</sub> H <sub>20</sub> O <sub>4</sub> (C <sub>5</sub> H <sub>8</sub> ) <sub>n</sub> | 56275-39-9  | 0.707 | 0.268 | 1.085 |
| Serum | cold vs. hot                                                 | 652.770  | 563.426 | 0.520 | SM 24:1                                             | C <sub>29</sub> H <sub>59</sub> N <sub>2</sub> O <sub>6</sub> P                              | 1.613       | 0.165 | 1.344 |       |
| Serum | cold vs. normal; RA vs. normal                               | 601.000  | 704.540 | 0.520 | MGDG 29:1                                           | C <sub>38</sub> H <sub>70</sub> O <sub>10</sub>                                              | 1.530       | 0.036 | 1.738 |       |

|       |                                                              |          |         |       |                                                     |                                                                              |            |       |       |       |
|-------|--------------------------------------------------------------|----------|---------|-------|-----------------------------------------------------|------------------------------------------------------------------------------|------------|-------|-------|-------|
| Serum | hot vs. normal                                               | 668.750  | 522.391 | 0.520 | CerP 27:0                                           | C <sub>27</sub> H <sub>56</sub> NO <sub>6</sub> P                            | 0.755      | 0.149 | 1.029 |       |
| Serum | cold vs. hot; cold vs. normal                                | 836.030  | 748.526 | 0.520 | plasmeyl-PE 38:6                                    | C <sub>43</sub> H <sub>74</sub> NO <sub>7</sub> P                            | 0.708      | 0.227 | 1.169 |       |
| Serum | cold vs. normal                                              | 730.580  | 702.562 | 0.510 | TAG 40:5 TAG 12:3-13:1-15:1 TG 40:5                 | C <sub>43</sub> H <sub>72</sub> O <sub>6</sub>                               | 0.904      | 0.208 | 1.145 |       |
| Serum | cold vs. hot                                                 | 748.040  | 702.561 | 0.510 | HexCer-AS d33:1 HexCer-AS d14:1/19:(                | C <sub>39</sub> H <sub>75</sub> NO <sub>9</sub>                              | 1.852      | 0.175 | 1.270 |       |
| Serum | cold vs. normal; hot vs. normal; RA vs. normal               | 861.160  | 429.371 | 0.510 | Mangiferdesmethylursanone                           | C <sub>29</sub> H <sub>48</sub> O <sub>2</sub>                               | 259144-62- | 0.651 | 0.153 | 1.274 |
| Serum | cold vs. normal; hot vs. normal; RA vs. normal               | 744.300  | 345.283 | 0.510 | 23-hydroxy-24,25,26,27-tetranorvitamin              | C <sub>23</sub> H <sub>36</sub> O <sub>2</sub>                               | 0.763      | 0.209 | 1.442 |       |
| Serum | cold vs. hot                                                 | 874.510  | 797.651 | 0.510 | SM 39:0                                             | C <sub>44</sub> H <sub>91</sub> N <sub>2</sub> O <sub>6</sub> P              | 1.369      | 0.236 | 1.161 |       |
| Serum | cold vs. hot; cold vs. normal                                | 708.000  | 503.408 | 0.510 | (20S)-1 $\alpha$ ,25-dihydroxy-20-methoxy-26,2      | C <sub>32</sub> H <sub>54</sub> O <sub>4</sub>                               | 1.502      | 0.239 | 1.135 |       |
| Serum | RA vs. normal                                                | 612.820  | 801.683 | 0.500 | SM d41:1 SM d14:0/27:1 SM(d14:0/27:1                | C <sub>46</sub> H <sub>93</sub> N <sub>2</sub> O <sub>6</sub> P              | 0.569      | 0.063 | 1.164 |       |
| Serum | cold vs. normal; RA vs. normal                               | 568.820  | 813.683 | 0.500 | SM d42:2 SM d27:1/15:1 SM(d27:1/15:1                | C <sub>47</sub> H <sub>93</sub> N <sub>2</sub> O <sub>6</sub> P              | 0.408      | 0.025 | 1.859 |       |
| Serum | cold vs. hot                                                 | 397.300  | 209.117 | 0.500 | $\alpha$ -Asaron trans-Isoasaron  $\alpha$ -Asarone | C <sub>12</sub> H <sub>16</sub> O <sub>3</sub>                               | 2883-98-9  | 2.328 | 0.071 | 1.612 |
| Serum | hot vs. normal; RA vs. normal; cold vs. hot; cold vs. normal | 1190.710 | 898.783 | 0.500 | TAG 54:5 TAG 18:1-18:2-18:2 TG 54:5                 | C <sub>57</sub> H <sub>100</sub> O <sub>6</sub>                              | 2.280      | 0.105 | 1.076 |       |
| Serum | hot vs. normal; RA vs. normal; cold vs. hot; cold vs. normal | 254.650  | 569.313 | 1.000 | 5-Oxoavermectin "1b" aglycone                       | C <sub>33</sub> H <sub>44</sub> O <sub>8</sub>                               | 2.770      | 0.305 | 1.063 |       |
| Serum | hot vs. normal; RA vs. normal; cold vs. hot; cold vs. normal | 419.890  | 573.302 | 1.000 | PI(16:0/0:0)                                        | C <sub>25</sub> H <sub>49</sub> O <sub>12</sub> P                            | 1.889      | 0.162 | 1.304 |       |
| Serum | hot vs. normal; RA vs. normal; cold vs. hot; cold vs. normal | 265.330  | 613.340 | 1.000 | PI(19:1(9Z)/0:0)                                    | C <sub>28</sub> H <sub>53</sub> O <sub>12</sub> P                            | 3.275      | 0.213 | 1.226 |       |
| Serum | hot vs. normal; RA vs. normal; cold vs. hot; cold vs. normal | 286.550  | 639.226 | 1.000 | 4'-Hydroxy-5,7,2'-trimethoxyflavanone 4'            | C <sub>30</sub> H <sub>38</sub> O <sub>15</sub>                              | 2.243      | 0.081 | 1.531 |       |
| Serum | hot vs. normal; RA vs. normal; cold vs. hot; cold vs. normal | 770.390  | 701.339 | 1.000 | Posaconazole (JAN/USAN/INN) Noxafil                 | C <sub>37</sub> H <sub>42</sub> F <sub>2</sub> N <sub>8</sub> O <sub>4</sub> | 171228-49- | 1.238 | 0.232 | 1.316 |
| Serum | hot vs. normal; RA vs. normal; cold vs. hot; cold vs. normal | 1327.940 | 827.698 | 1.000 | SM d43:2 SM d16:1/27:1 SM(d16:1/27:1                | C <sub>48</sub> H <sub>95</sub> N <sub>2</sub> O <sub>6</sub> P              | 1.795      | 0.025 | 1.922 |       |
| Serum | cold vs. hot                                                 | 1220.360 | 853.723 | 1.000 | TG 50:2                                             | C <sub>53</sub> H <sub>98</sub> O <sub>6</sub>                               | 0.505      | 0.241 | 1.140 |       |
| Serum | cold vs. hot; cold vs. normal; hot vs. normal; RA vs. normal | 809.960  | 768.552 | 1.000 | PC(22:4(7Z,10Z,13Z,16Z)/13:0)                       | C <sub>43</sub> H <sub>78</sub> NO <sub>8</sub> P                            | 1.304      | 0.211 | 1.188 |       |
| Serum | cold vs. hot; cold vs. normal; hot vs. normal; RA vs. normal | 486.880  | 610.368 | 1.000 | PC(16:0/5:0(COOH))                                  | C <sub>29</sub> H <sub>56</sub> NO <sub>10</sub> P                           | 1.979      | 0.023 | 1.862 |       |

**Table S4.2. Significantly differential metabolites of serum and synovial fluid samples from RA-Cold and RA-Hot patients detected by LC/MS**

| Sample type    | Groups             | Types         | English Name                    | Molecular Formula                                               | CAS No.     | FC    | P (T test) | VIP   |
|----------------|--------------------|---------------|---------------------------------|-----------------------------------------------------------------|-------------|-------|------------|-------|
| Synovial fluid | RA-Cold vs. RA-Hot | Steroids      | Glycodeoxycholic acid           | C <sub>26</sub> H <sub>43</sub> NO <sub>5</sub>                 | 360-65-6    | 0.446 | 0.049      | 1.105 |
| Synovial fluid | RA-Cold vs. RA-Hot | Indoles       | Indoxyl sulfate                 | C <sub>8</sub> H <sub>7</sub> NO <sub>4</sub> S                 | 2642-37-7   | 2.44  | 0.039      | 1.152 |
| Synovial fluid | RA-Cold vs. RA-Hot | Amino acids   | Phenylacetyl-L-glutamine        | C <sub>13</sub> H <sub>16</sub> N <sub>2</sub> O <sub>4</sub>   | 28047-15-6  | 3.012 | 0.032      | 1.191 |
| Synovial fluid | RA-Cold vs. RA-Hot | Others        | p-Tolyl Sulfate                 | C <sub>7</sub> H <sub>8</sub> O <sub>4</sub> S                  | 91978-69-7  | 4.715 | 0.033      | 1.188 |
| Synovial fluid | RA-Cold vs. RA-Hot | Sphingolipids | Hexadecaspheganine              | C <sub>16</sub> H <sub>35</sub> NO <sub>2</sub>                 |             | 0.453 | 0.049      | 1.103 |
| Synovial fluid | RA-Cold vs. RA-Hot | Phospholipids | PI(12:0/22:2(13Z,16Z))          | C <sub>43</sub> H <sub>79</sub> O <sub>13</sub> P               |             | 2.043 | 0.02       | 1.287 |
| Synovial fluid | RA-Cold vs. RA-Hot | Fatty acids   | Montecristin                    | C <sub>37</sub> H <sub>66</sub> O <sub>4</sub>                  | 185336-15-6 | 4.163 | 0.022      | 1.315 |
| Serum          | RA-Cold vs. RA-Hot | Others        | AFMK                            | C <sub>13</sub> H <sub>16</sub> N <sub>2</sub> O <sub>4</sub>   | 52450-38-1  | 3.91  | 0.002      | 2.367 |
| Serum          | RA-Cold vs. RA-Hot | Fatty acids   | Stearamide                      | C <sub>18</sub> H <sub>37</sub> NO                              | 124-26-5    | 0.12  | 0.008      | 2.093 |
| Serum          | RA-Cold vs. RA-Hot | Sphingolipids | SM 42:2                         | C <sub>47</sub> H <sub>93</sub> N <sub>2</sub> O <sub>6</sub> P |             | 3.114 | 0.014      | 1.992 |
| Serum          | RA-Cold vs. RA-Hot | Terpenoids    | Ganoderiol H                    | C <sub>30</sub> H <sub>50</sub> O <sub>5</sub>                  | 114612-72-5 | 2.029 | 0.049      | 1.727 |
| Serum          | RA-Cold vs. RA-Hot | Fatty acids   | β-Linoleic acid                 | C <sub>18</sub> H <sub>32</sub> O <sub>2</sub>                  | 60-33-3     | 2.312 | 0.013      | 2.007 |
| Serum          | RA-Cold vs. RA-Hot | Sphingolipids | SM 40:1                         | C <sub>45</sub> H <sub>91</sub> N <sub>2</sub> O <sub>6</sub> P |             | 1.547 | 0.04       | 1.853 |
| Synovial fluid | RA-Cold vs. NC     | Phospholipids | PE(18:2(9Z,12Z)/0:0)            | C <sub>23</sub> H <sub>44</sub> NO <sub>7</sub> P               | 85046-18-0  | 0.462 | 0.017      | 1.137 |
| Synovial fluid | RA-Cold vs. NC     | Phospholipids | LysoPE 20:3                     | C <sub>25</sub> H <sub>46</sub> NO <sub>7</sub> P               |             | 2.079 | 0.004      | 1.323 |
| Synovial fluid | RA-Cold vs. NC     | Fatty acids   | Cis-9,10-Epoxy stearic acid     | C <sub>18</sub> H <sub>34</sub> O <sub>3</sub>                  | 2443-39-2   | 0.312 | 0.021      | 1.072 |
| Synovial fluid | RA-Cold vs. NC     | Steroids      | Pubescenol                      | C <sub>28</sub> H <sub>42</sub> O <sub>6</sub>                  | 90685-93-1  | 0.389 | 0.012      | 1.208 |
| Synovial fluid | RA-Cold vs. NC     | Phospholipids | PE 40:7e                        | C <sub>45</sub> H <sub>78</sub> NO <sub>7</sub> P               |             | 0.403 | 0.017      | 1.109 |
| Synovial fluid | RA-Cold vs. NC     | Ceramides     | HexCer-ADS d37:2                | C <sub>43</sub> H <sub>81</sub> NO <sub>9</sub>                 |             | 0.495 | 0.021      | 1.071 |
| Synovial fluid | RA-Cold vs. NC     | Ceramides     | Cer-BDS d46:9                   | C <sub>46</sub> H <sub>75</sub> NO <sub>4</sub>                 |             | 3.051 | 0.02       | 1.082 |
| Synovial fluid | RA-Cold vs. NC     | Ceramides     | HexCer-ADS d35:0; HexCer-ADS    | C <sub>41</sub> H <sub>81</sub> NO <sub>9</sub>                 |             | 0.42  | 0.026      | 1.044 |
| Synovial fluid | RA-Cold vs. NC     | Ceramides     | HexCer-AS d39:4                 | C <sub>45</sub> H <sub>81</sub> NO <sub>9</sub>                 |             | 0.342 | 0.028      | 1.094 |
| Synovial fluid | RA-Cold vs. NC     | Terpenoids    | Gibberellic acid                | C <sub>19</sub> H <sub>22</sub> O <sub>6</sub>                  | 28281       | 0.133 | 0.012      | 1.106 |
| Synovial fluid | RA-Cold vs. NC     | Ceramides     | Cer 36:1                        | C <sub>36</sub> H <sub>71</sub> NO <sub>3</sub>                 |             | 0.248 | 0.027      | 1.034 |
| Synovial fluid | RA-Cold vs. NC     | Ceramides     | HexCer-AS d37:2; HexCer-AS d21C | C <sub>43</sub> H <sub>81</sub> NO <sub>9</sub>                 |             | 0.289 | 0.01       | 1.201 |
| Synovial fluid | RA-Cold vs. NC     | Sphingolipids | SM d39:1                        | C <sub>44</sub> H <sub>89</sub> N <sub>2</sub> O <sub>6</sub> P |             | 2.303 | 0.005      | 1.238 |

|                |                |               |                                                     |                       |                    |       |       |       |
|----------------|----------------|---------------|-----------------------------------------------------|-----------------------|--------------------|-------|-------|-------|
| Synovial fluid | RA-Cold vs. NC | Ceramides     | Cer 40:2                                            | $C_{40}H_{77}NO_3$    |                    | 0.171 | 0.005 | 1.239 |
| Synovial fluid | RA-Cold vs. NC | Ceramides     | HexCer-NDS d42:1                                    | $C_{48}H_{93}NO_8$    |                    | 0.44  | 0.005 | 1.198 |
| Synovial fluid | RA-Cold vs. NC | Fatty acids   | Pinolenic Acid                                      | $C_{18}H_{30}O_2$     | 16833-54-8         | 0.431 | 0.032 | 1.001 |
| Synovial fluid | RA-Cold vs. NC | Phospholipids | PC(12:0/19:0)                                       | $C_{39}H_{78}NO_8P$   |                    | 2.013 | 0.019 | 1.073 |
| Synovial fluid | RA-Cold vs. NC | Others        | $\alpha$ -Tocopherol                                | $C_{29}H_{50}O_2$     | 59-02-9 10191-41-0 | 2.888 | 0.002 | 1.454 |
| Serum          | RA-Cold vs. NC | Phospholipids | PC 16:0-22:7                                        | $C_{47}H_{80}NO_8P$   |                    | 2.598 | 0.017 | 1.978 |
| Serum          | RA-Cold vs. NC | Fatty acids   | $\alpha$ -Linolenic acid                            | $C_{18}H_{30}O_2$     | 463-40-1           | 2.219 | 0.043 | 1.711 |
| Serum          | RA-Cold vs. NC | Phospholipids | PC(22:4(7Z,10Z,13Z,16Z)/0:0)                        | $C_{30}H_{54}NO_7P$   |                    | 1.506 | 0.001 | 2.38  |
| Serum          | RA-Cold vs. NC | Phospholipids | PC 32:1                                             | $C_{40}H_{78}NO_8P$   |                    | 1.961 | 0.023 | 1.861 |
| Serum          | RA-Cold vs. NC | Amino acids   | D-Phenylalanine                                     | $C_9H_{11}NO_2$       | 673-06-3           | 1.445 | 0.001 | 2.37  |
| Serum          | RA-Cold vs. NC | Indoles       | Indoline                                            | $C_8H_9N$             | 496-15-1           | 1.382 | 0.031 | 1.778 |
| Serum          | RA-Cold vs. NC | Others        | Castasterone                                        | $C_{28}H_{48}O_5$     | 80736-41-0         | 1.989 | 0.004 | 2.288 |
| Synovial fluid | RA-Hot vs. NC  | Steroids      | Beclomethasone                                      | $C_{22}H_{29}ClO_5$   | 4419-39-0          | 0.29  | 0.004 | 1.099 |
| Synovial fluid | RA-Hot vs. NC  | Ceramides     | Cer 42:3                                            | $C_{42}H_{79}NO_3$    |                    | 0.365 | 0.007 | 1.034 |
| Synovial fluid | RA-Hot vs. NC  | Indoles       | Stovaine                                            | $C_{14}H_{21}NO_2$    | 644-26-8           | 0.414 | 0.003 | 1.132 |
| Synovial fluid | RA-Hot vs. NC  | Others        | Chalcomoracin                                       | $C_{39}H_{36}O_9$     | 76472-89-4         | 0.126 | 0.006 | 1.032 |
| Synovial fluid | RA-Hot vs. NC  | Steroids      | 5 $\alpha$ -Androstane-11 $\beta$ ,17 $\beta$ -diol | $C_{19}H_{32}O_2$     |                    | 0.079 | 0.007 | 1.034 |
| Synovial fluid | RA-Hot vs. NC  | Sphingolipids | SM d28:3                                            | $C_{33}H_{63}N_2O_6P$ |                    | 0.393 | 0.004 | 1.056 |
| Synovial fluid | RA-Hot vs. NC  | Steroids      | Progesterone                                        |                       |                    | 0.388 | 0.005 | 1.067 |
| Synovial fluid | RA-Hot vs. NC  | Phospholipids | PC(16:0/9:0(CHO))                                   | $C_{33}H_{64}NO_9P$   |                    | 0.388 | 0.003 | 1.105 |
| Synovial fluid | RA-Hot vs. NC  | Others        | 1-Hexadecylamine                                    | $C_{16}H_{35}N$       | 143-27-1           | 2.409 | 0     | 1.253 |
| Synovial fluid | RA-Hot vs. NC  | Phospholipids | PC(P-19:1(12Z)/0:0)                                 | $C_{27}H_{54}NO_6P$   |                    | 2.916 | 0.007 | 1.067 |
| Synovial fluid | RA-Hot vs. NC  | Phospholipids | PS(P-16:0/13:0)                                     | $C_{35}H_{68}NO_9P$   |                    | 0.439 | 0.004 | 1.062 |
| Synovial fluid | RA-Hot vs. NC  | Ceramides     | CerP 29:1                                           | $C_{29}H_{58}NO_6P$   |                    | 2.835 | 0.002 | 1.155 |
| Synovial fluid | RA-Hot vs. NC  | Ceramides     | Cer-NDS d32:0                                       | $C_{32}H_{65}NO_3$    |                    | 0.047 | 0.011 | 1.136 |
| Synovial fluid | RA-Hot vs. NC  | Phospholipids | PA(21:0/20:1(11Z))                                  | $C_{44}H_{85}O_8P$    |                    | 0.444 | 0.006 | 1.043 |
| Serum          | RA-Hot vs. NC  | Phospholipids | PC(P-16:0/22:6(4Z,7Z,10Z,13Z,16                     | $C_{46}H_{80}NO_7P$   |                    | 0.512 | 0.002 | 1.8   |
| Serum          | RA-Hot vs. NC  | Ceramides     | PE-Cer(d15:1(4E)/22:0(2OH))                         | $C_{39}H_{79}N_2O_7P$ |                    | 0.419 | 0.035 | 1.316 |

|       |               |               |                                   |                        |       |       |       |
|-------|---------------|---------------|-----------------------------------|------------------------|-------|-------|-------|
| Serum | RA-Hot vs. NC | Sphingolipids | C18-OH Sulfatide                  | $C_{42}H_{81}NO_{12}S$ | 0.288 | 0.004 | 1.663 |
| Serum | RA-Hot vs. NC | Sphingolipids | SM d42:2                          | $C_{47}H_{93}N_2O_6P$  | 0.272 | 0.002 | 1.795 |
| Serum | RA-Hot vs. NC | Terpenoids    | Dihydrogeranylgeranyl diphosphate | $C_{20}H_{38}O_7P_2$   | 0.302 | 0.046 | 1.296 |
| Serum | RA-Hot vs. NC | Phospholipids | PI 33:2                           | $C_{42}H_{77}O_{13}P$  | 1.23  | 0.03  | 1.344 |

---
