# Supplementary material for: Integrative network fusion-based multi-omics study for biomarker identification and patient classification of rheumatoid arthritis
Source: PubMed Central journal article supplement (PMC10158004; doi:10.1186/s13020-023-00750-8), 2023-05-04
Supplement: 13020_2023_750_MOESM5_ESM.pdf [file 13020_2023_750_MOESM5_ESM.pdf]

**Table S5.1. Significantly differential metabolites of urine samples from AIA-Cold rats detected by LC/MS**

| Groups   | Samples | Description                       | AIA-Cold/Con | Log2FC      | Pathways                           |
|----------|---------|-----------------------------------|--------------|-------------|------------------------------------|
| AIA-Cold | Urine   | S-(5'-Adenosyl)-L-Methionine      | 0.493307557  | -1.01944071 | Arginine and proline metabolism    |
| AIA-Cold | Urine   | Creatine                          | 8.366479749  | 3.064620727 | Arginine and proline metabolism    |
| AIA-Cold | Urine   | 4-Guanidinobutanoate              | 0.456869248  | -1.13014676 | Arginine and proline metabolism    |
| AIA-Cold | Urine   | Thiamine Pyrophosphate            | 0.435838836  | -1.19813334 | Citrate cycle (TCA cycle)          |
| AIA-Cold | Urine   | Phosphoenolpyruvate               | 9.225972078  | 3.205700926 | Citrate cycle (TCA cycle)          |
| AIA-Cold | Urine   | Citrate                           | 13.51756784  | 3.756763692 | Citrate cycle (TCA cycle)          |
| AIA-Cold | Urine   | UDP-Glucose                       | 0.162301075  | -2.62325554 | Galactose metabolism               |
| AIA-Cold | Urine   | Stachyose                         | 21.13657715  | 4.401669861 | Galactose metabolism               |
| AIA-Cold | Urine   | Glucose                           | 2.240857499  | 1.164050907 | Galactose metabolism               |
| AIA-Cold | Urine   | D-(+)-Raffinose                   | 18.96958542  | 4.245616244 | Galactose metabolism               |
| AIA-Cold | Urine   | 2-Deoxy-D-Glucose                 | 2.164046845  | 1.11373173  | Galactose metabolism               |
| AIA-Cold | Urine   | Phenylpyruvate                    | 0.46797327   | -1.09550197 | Phenylalanine metabolism           |
| AIA-Cold | Urine   | Phenylacetic Acid                 | 0.389913184  | -1.35877516 | Phenylalanine metabolism           |
| AIA-Cold | Urine   | Phenylacetaldehyde                | 0.096844459  | -3.36818668 | Phenylalanine metabolism           |
| AIA-Cold | Urine   | Hippurate                         | 0.464735508  | -1.10551822 | Phenylalanine metabolism           |
| AIA-Cold | Urine   | Tetrahydrocortisol                | 34.98765671  | 5.128774138 | Steroid hormone biosynthesis       |
| AIA-Cold | Urine   | Testosterone                      | 2.338566587  | 1.225624508 | Steroid hormone biosynthesis       |
| AIA-Cold | Urine   | Progesterone                      | 75.8709099   | 6.245474935 | Steroid hormone biosynthesis       |
| AIA-Cold | Urine   | Pregnenolone                      | 0.181938097  | -2.45848043 | Steroid hormone biosynthesis       |
| AIA-Cold | Urine   | Dehydroepiandrosterone sulfate    | 18.11655182  | 4.179236484 | Steroid hormone biosynthesis       |
| AIA-Cold | Urine   | Dehydroepiandrosterone            | 6.341607405  | 2.664848566 | Steroid hormone biosynthesis       |
| AIA-Cold | Urine   | Cortisone                         | 4.262827019  | 2.091810513 | Steroid hormone biosynthesis       |
| AIA-Cold | Urine   | Cortisol                          | 5.431122366  | 2.441250368 | Steroid hormone biosynthesis       |
| AIA-Cold | Urine   | Corticosterone                    | 10.82678542  | 3.436533051 | Steroid hormone biosynthesis       |
| AIA-Cold | Urine   | Androsterone                      | 6.847270516  | 2.77552901  | Steroid hormone biosynthesis       |
| AIA-Cold | Urine   | Androstenedione                   | 22.48667876  | 4.490998688 | Steroid hormone biosynthesis       |
| AIA-Cold | Urine   | 17-hydroxypregnenolone            | 38.19807245  | 5.255427934 | Steroid hormone biosynthesis       |
| AIA-Cold | Urine   | Taurine                           | 10.38314551  | 3.376171661 | Taurine and hypotaurine metabolism |
| AIA-Cold | Urine   | Hypotaurine                       | 0.356084792  | -1.48970727 | Taurine and hypotaurine metabolism |
| AIA-Cold | Urine   | Kynurenine                        | 0.435052474  | -1.20073867 | Tryptophan metabolism              |
| AIA-Cold | Urine   | Indole-3-Acetic Acid              | 0.404480557  | -1.30585774 | Tryptophan metabolism              |
| AIA-Cold | Urine   | Anthranilate                      | 0.476646397  | -1.0690087  | Tryptophan metabolism              |
| AIA-Cold | Urine   | 5-Hydroxy-L-Tryptophan            | 2.529955097  | 1.33911178  | Tryptophan metabolism              |
| AIA-Cold | Urine   | 5-Hydroxyindoleacetate            | 4.320686708  | 2.111260625 | Tryptophan metabolism              |
| AIA-Cold | Urine   | 3-Hydroxykynurenine               | 0.375290127  | -1.41392176 | Tryptophan metabolism              |
| AIA-Cold | Urine   | Xanthine                          | 6.911980056  | 2.789099055 |                                    |
| AIA-Cold | Urine   | Trans-Cinnamate                   | 0.299095254  | -1.74132307 |                                    |
| AIA-Cold | Urine   | Trans-Cinnamaldehyde              | 0.356723743  | -1.48712085 |                                    |
| AIA-Cold | Urine   | Threonine                         | 9.556989015  | 3.25655616  |                                    |
| AIA-Cold | Urine   | Sorbate                           | 15.04482367  | 3.911195293 |                                    |
| AIA-Cold | Urine   | Sn-Glycero-3-Phosphocholine       | 30.37905837  | 4.925005247 |                                    |
| AIA-Cold | Urine   | Salicylic Acid                    | 0.449927047  | -1.152237   |                                    |
| AIA-Cold | Urine   | Retinol                           | 0.307094825  | -1.70324389 |                                    |
| AIA-Cold | Urine   | Quinoline                         | 0.389852028  | -1.35900146 |                                    |
| AIA-Cold | Urine   | Pantolactone                      | 21.79111555  | 4.445668149 |                                    |
| AIA-Cold | Urine   | Oxalomalic Acid                   | 0.361024983  | -1.46982942 |                                    |
| AIA-Cold | Urine   | Nonanoate                         | 0.391239189  | -1.35387721 |                                    |
| AIA-Cold | Urine   | N-Methyl-L-Glutamate              | 10.11304379  | 3.338145374 |                                    |
| AIA-Cold | Urine   | Nalpa-Acetyl-L-Lysine             | 2.276706577  | 1.186948368 |                                    |
| AIA-Cold | Urine   | N-Acetylneuraminic acid           | 2.227813456  | 1.155628435 |                                    |
| AIA-Cold | Urine   | N-Acetyl-L-Cysteine               | 0.378552122  | -1.40143614 |                                    |
| AIA-Cold | Urine   | N,N-Dimethyl-1,4-Phenylenediamine | 0.408605053  | -1.29122105 |                                    |
| AIA-Cold | Urine   | Methyl Jasmonate                  | 5.420272604  | 2.438365412 |                                    |
| AIA-Cold | Urine   | L-Homocysteine Thiolactone        | 0.442256571  | -1.17704452 |                                    |
| AIA-Cold | Urine   | Leukotriene B4                    | 5.381696155  | 2.42806094  |                                    |
| AIA-Cold | Urine   | Inosine                           | 6.825231904  | 2.770878066 | Purine metabolism                  |
| AIA-Cold | Urine   | Hydroxypyruvate                   | 217.9797829  | 7.768050525 |                                    |
| AIA-Cold | Urine   | Hydroxyproline                    | 0.437067861  | -1.1940708  |                                    |

|          |       |                              |             |             |                   |
|----------|-------|------------------------------|-------------|-------------|-------------------|
| AIA-Cold | Urine | Hexadecanoic Acid            | 2.601195915 | 1.379175063 |                   |
| AIA-Cold | Urine | Glyceraldehyde               | 2.452813066 | 1.294437287 |                   |
| AIA-Cold | Urine | Glutarate                    | 3.54718143  | 1.826673123 |                   |
| AIA-Cold | Urine | Gluconic Acid                | 3.202269783 | 1.679094856 |                   |
| AIA-Cold | Urine | Geranylgeranyl Pyrophosphate | 3.035373634 | 1.601874113 |                   |
| AIA-Cold | Urine | Flumethasone                 | 0.042990782 | -4.53982885 |                   |
| AIA-Cold | Urine | Farnesyl Diphosphate         | 2.090732878 | 1.064008748 |                   |
| AIA-Cold | Urine | Ethyl 3-Ureidopropionate     | 22.86375791 | 4.514990641 |                   |
| AIA-Cold | Urine | Epinephrine                  | 0.46719575  | -1.09790094 |                   |
| AIA-Cold | Urine | D-Ribulose 1,5-Bisphosphate  | 0.307929047 | -1.69933013 |                   |
| AIA-Cold | Urine | D-Lactose                    | 4.555747916 | 2.18768792  |                   |
| AIA-Cold | Urine | De thiobiotin                | 7.212633035 | 2.850526024 |                   |
| AIA-Cold | Urine | Deoxyribose                  | 2.47460175  | 1.307196363 |                   |
| AIA-Cold | Urine | D-(+)-Galacturonic Acid      | 2.024439751 | 1.017522708 |                   |
| AIA-Cold | Urine | Cytidine 5'-Diphosphate      | 0.388450448 | -1.36419752 |                   |
| AIA-Cold | Urine | Citramalate                  | 2.764924578 | 1.467240127 |                   |
| AIA-Cold | Urine | Cholic Acid                  | 5.414686778 | 2.436877885 |                   |
| AIA-Cold | Urine | cGMP                         | 4.540612856 | 2.182887034 |                   |
| AIA-Cold | Urine | Carnitine                    | 21.79275615 | 4.445776762 |                   |
| AIA-Cold | Urine | Carbamoylphosphate           | 9.977406658 | 3.318664877 |                   |
| AIA-Cold | Urine | C22-OH Sulfatide             | 33.83084174 | 5.080267168 |                   |
| AIA-Cold | Urine | Benzyl Alcohol               | 0.481707231 | -1.05377151 |                   |
| AIA-Cold | Urine | Beclomethasone               | 25.37518169 | 4.665346247 |                   |
| AIA-Cold | Urine | Azelaic Acid                 | 3.027059042 | 1.597916815 |                   |
| AIA-Cold | Urine | Aniline-2-Sulfonic Acid      | 0.496447511 | -1.0102869  |                   |
| AIA-Cold | Urine | Aniline                      | 0.271501748 | -1.88096661 |                   |
| AIA-Cold | Urine | AMP                          | 2.920232314 | 1.546083145 |                   |
| AIA-Cold | Urine | 6-Phosphogluconate           | 3.761257247 | 1.911214981 |                   |
| AIA-Cold | Urine | 5,6-Dihydrouracil            | 4.195313606 | 2.068778658 |                   |
| AIA-Cold | Urine | 4-Hydroxybenzaldehyde        | 0.324205044 | -1.62502156 |                   |
| AIA-Cold | Urine | 3-Methoxy-L-Tyrosine         | 4.511241417 | 2.173524493 |                   |
| AIA-Cold | Urine | 3-Hydroxybutanoic Acid       | 2.083795397 | 1.05921363  |                   |
| AIA-Cold | Urine | 2'-Deoxyguanosine            | 0.430655361 | -1.21539431 | Purine metabolism |
| AIA-Cold | Urine | 2'-Deoxyadenosine            | 2.729267466 | 1.448513784 | Purine metabolism |
| AIA-Cold | Urine | 2,6-Dihydroxypyridine        | 0.491053548 | -1.02604774 |                   |
| AIA-Cold | Urine | 1-Methylhistidine            | 2.835295542 | 1.503499125 |                   |
| AIA-Cold | Urine | (S)-1-Phenylethanol          | 0.420250544 | -1.25067841 |                   |

**Table S5.2. Significantly differential metabolites of serum samples from AIA-Cold rats detected by LC/MS**

| Groups   | Samples | Description                         | AIA-Cold/Con | Log2FC      | Pathways                     |
|----------|---------|-------------------------------------|--------------|-------------|------------------------------|
| AIA-Cold | Serum   | Phenylacetaldehyde                  | 0.085664951  | -3.54515113 | Phenylalanine metabolism     |
| AIA-Cold | Serum   | Dehydroepiandrosterone sulfate      | 1.501265023  | 0.586178683 | Steroid hormone biosynthesis |
| AIA-Cold | Serum   | Androsterone                        | 0.059615889  | -4.0681593  | Steroid hormone biosynthesis |
| AIA-Cold | Serum   | Pregnenolone                        | 0.037170839  | -4.74968494 | Steroid hormone biosynthesis |
| AIA-Cold | Serum   | Dehydroepiandrosterone              | 0.243032474  | -2.04077899 | Steroid hormone biosynthesis |
| AIA-Cold | Serum   | 17-hydroxypregnenolone              | 0.087797258  | -3.5096803  | Steroid hormone biosynthesis |
| AIA-Cold | Serum   | Tetrahydrodeoxycorticosterone       | 0.008080726  | -6.95129933 | Steroid hormone biosynthesis |
| AIA-Cold | Serum   | Pregnanolone                        | 0.136743994  | -2.87045063 | Steroid hormone biosynthesis |
| AIA-Cold | Serum   | Menaquinone                         | 0.2327841    | -2.10293558 | Ubiquinone biosynthesis      |
| AIA-Cold | Serum   | Phylloquinone                       | 0.008918786  | -6.80893686 | Ubiquinone biosynthesis      |
| AIA-Cold | Serum   | 2-Arachidonoylglycerol              | 0.034884515  | -4.84126941 |                              |
| AIA-Cold | Serum   | Farnesyl Diphosphate                | 2.456275287  | 1.29647226  |                              |
| AIA-Cold | Serum   | Amylose                             | 0.191652544  | -2.38343494 |                              |
| AIA-Cold | Serum   | Caffeine                            | 0.397726454  | -1.33015157 |                              |
| AIA-Cold | Serum   | Uridine 5'-Diphosphoglucuronic Acid | 0.041484101  | -4.59129768 |                              |
| AIA-Cold | Serum   | Myristic Acid                       | 0.528758247  | -0.91931984 |                              |
| AIA-Cold | Serum   | N,N-Dimethyl-1,4-Phenylenediamine   | 0.107479449  | -3.21786726 |                              |
| AIA-Cold | Serum   | Retinol                             | 0.101298017  | -3.30332216 |                              |
| AIA-Cold | Serum   | 9E-Octadecenoic Acid                | 0.163647288  | -2.6113384  |                              |
| AIA-Cold | Serum   | Glyoxylic Acid                      | 0.127665057  | -2.96956439 |                              |
| AIA-Cold | Serum   | PCe 36:5                            | 4.213406309  | 2.074987045 |                              |
| AIA-Cold | Serum   | N-Acetyl-DL-Glutamic Acid           | 0.084692242  | -3.56162637 |                              |
| AIA-Cold | Serum   | LPC 20:1                            | 2.569771867  | 1.361640289 |                              |
| AIA-Cold | Serum   | LPC 20:2                            | 0.189925193  | -2.39649681 |                              |
| AIA-Cold | Serum   | PC 38:7                             | 2.986995377  | 1.578695005 |                              |
| AIA-Cold | Serum   | Rac-Glycerol 1-Myristate            | 3.239348281  | 1.695703589 |                              |
| AIA-Cold | Serum   | Octadecanoic Acid                   | 2.09543978   | 1.067253061 |                              |
| AIA-Cold | Serum   | 1-Oleoyl-Rac-Glycerol               | 3.012716657  | 1.591064995 |                              |
| AIA-Cold | Serum   | Desmosterol                         | 0.023735747  | -5.39679475 |                              |
| AIA-Cold | Serum   | C18DH Cer                           | 0.457969643  | -1.12667612 |                              |
| AIA-Cold | Serum   | PG 38:3                             | 3.593510032  | 1.845393713 |                              |
| AIA-Cold | Serum   | PS 28:2                             | 0.0607965    | -4.03986792 |                              |
| AIA-Cold | Serum   | Dihydroorotic Acid                  | 0.38068243   | -1.39334011 |                              |
| AIA-Cold | Serum   | C12 Sphingomyelin                   | 2.135159006  | 1.094343512 |                              |
| AIA-Cold | Serum   | Beclomethasone                      | 0.005371525  | -7.54045257 |                              |
| AIA-Cold | Serum   | Geranyl Pyrophosphate               | 2.322803574  | 1.215867159 |                              |
| AIA-Cold | Serum   | PEp 36:4                            | 2.741021464  | 1.454713626 |                              |
| AIA-Cold | Serum   | Citramalate                         | 2.239983112  | 1.163487855 |                              |
| AIA-Cold | Serum   | L-Anserine                          | 3.268028875  | 1.70842073  |                              |
| AIA-Cold | Serum   | C22DH Sphingomyelin                 | 3.665688221  | 1.874084085 |                              |
| AIA-Cold | Serum   | MG (16:0/0:0/0:0)                   | 2.151450087  | 1.10530937  |                              |
| AIA-Cold | Serum   | Quinate                             | 0.2133233    | -2.22888655 |                              |
| AIA-Cold | Serum   | Benzylamine                         | 4.767364724  | 2.253192002 |                              |
| AIA-Cold | Serum   | Leukotriene B4                      | 2.059564909  | 1.042339595 |                              |
| AIA-Cold | Serum   | PS 28:0                             | 2.794710358  | 1.482698771 |                              |
| AIA-Cold | Serum   | Glycocholic Acid                    | 0.356330801  | -1.4887109  |                              |
| AIA-Cold | Serum   | LPC 18:0                            | 0.12313413   | -3.02169739 |                              |
| AIA-Cold | Serum   | Cholic Acid                         | 6.584722518  | 2.719122646 |                              |
| AIA-Cold | Serum   | HexCer d18:1/16:0                   | 0.080578544  | -3.63346045 |                              |
| AIA-Cold | Serum   | Taurocholic Acid                    | 21.06141075  | 4.39653017  |                              |

**Table S5.3. Significantly differential metabolites of urine samples from AIA-Hot rats detected by LC/MS**

| Groups  | Samples | Description                       | AIA-Hot/Con | Log2FC      | Pathways                                                                                   |
|---------|---------|-----------------------------------|-------------|-------------|--------------------------------------------------------------------------------------------|
| AIA-Hot | Urine   | 4-Aminobutanoate                  | 2.044823916 | 1.031976615 | Arginine and proline metabolism                                                            |
| AIA-Hot | Urine   | Creatine                          | 0.143997809 | -2.79588124 | Arginine and proline metabolism                                                            |
| AIA-Hot | Urine   | 4-Guanidinobutanoate              | 23.41724783 | 4.549499624 | Arginine and proline metabolism                                                            |
| AIA-Hot | Urine   | Phosphocreatine                   | 2.90095955  | 1.536530179 | Arginine and proline metabolism                                                            |
| AIA-Hot | Urine   | S-(5'-Adenosyl)-L-Methionine      | 2.337731493 | 1.225109235 | Arginine and proline metabolism                                                            |
| AIA-Hot | Urine   | Glutamine                         | 0.37495249  | -1.41522029 | D-Glutamine and D-glutamate metabolism/Nitrogen metabolism                                 |
| AIA-Hot | Urine   | Glutamic Acid                     | 0.064917039 | -3.94525899 | D-Glutamine and D-glutamate metabolism/Arginine and proline metabolism/Nitrogen metabolism |
| AIA-Hot | Urine   | Raffinose                         | 0.314995055 | -1.66659891 | Galactose metabolism                                                                       |
| AIA-Hot | Urine   | Phenylacetaldehyde                | 24.91582189 | 4.638990259 | Phenylalanine metabolism                                                                   |
| AIA-Hot | Urine   | Phenylacetic Acid                 | 2.569597662 | 1.361542485 | Phenylalanine metabolism                                                                   |
| AIA-Hot | Urine   | Phenylpyruvate                    | 2.442241517 | 1.288205878 | Phenylalanine metabolism                                                                   |
| AIA-Hot | Urine   | Hippurate                         | 2.253015847 | 1.171857461 | Phenylalanine metabolism                                                                   |
| AIA-Hot | Urine   | Hypoxanthine                      | 0.46879196  | -1.09298027 | Purine metabolism                                                                          |
| AIA-Hot | Urine   | L-serine                          | 0.06227038  | -4.00531012 | Sphingolipid metabolism                                                                    |
| AIA-Hot | Urine   | Sphinganine                       | 8.302555194 | 3.053555409 | Sphingolipid metabolism                                                                    |
| AIA-Hot | Urine   | Ceramide (d18:1/12:0)             | 2.44660438  | 1.290780834 | Sphingolipid metabolism                                                                    |
| AIA-Hot | Urine   | Androstenedione                   | 0.035752109 | -4.80582784 | Steroid hormone biosynthesis                                                               |
| AIA-Hot | Urine   | Dehydroepiandrosterone            | 0.196578382 | -2.34682342 | Steroid hormone biosynthesis                                                               |
| AIA-Hot | Urine   | Androsterone                      | 0.128933709 | -2.9552986  | Steroid hormone biosynthesis                                                               |
| AIA-Hot | Urine   | Progesterone                      | 0.199561593 | -2.325094   | Steroid hormone biosynthesis                                                               |
| AIA-Hot | Urine   | Dihydrotestosterone               | 0.19921094  | -2.32763122 | Steroid hormone biosynthesis                                                               |
| AIA-Hot | Urine   | Pregnanolone                      | 2.296139891 | 1.19921054  | Steroid hormone biosynthesis                                                               |
| AIA-Hot | Urine   | Pregnenolone                      | 8.051131646 | 3.009191579 | Steroid hormone biosynthesis                                                               |
| AIA-Hot | Urine   | Cortisol                          | 2.114742703 | 1.080482144 | Steroid hormone biosynthesis                                                               |
| AIA-Hot | Urine   | Corticosterone                    | 0.189808554 | -2.39738308 | Steroid hormone biosynthesis                                                               |
| AIA-Hot | Urine   | Tetrahydrocortisol                | 0.331638757 | -1.59231548 | Steroid hormone biosynthesis                                                               |
| AIA-Hot | Urine   | Hypotaurine                       | 2.639179228 | 1.400089328 | Taurine and hypotaurine metabolism                                                         |
| AIA-Hot | Urine   | Taurine                           | 0.047043756 | -4.40985294 | Taurine and hypotaurine metabolism                                                         |
| AIA-Hot | Urine   | Hydroquinone                      | 2.673847718 | 1.418917303 |                                                                                            |
| AIA-Hot | Urine   | Aniline                           | 5.60905543  | 2.48775784  |                                                                                            |
| AIA-Hot | Urine   | Succinic Acid                     | 0.113926009 | -3.13383095 |                                                                                            |
| AIA-Hot | Urine   | Threonine                         | 0.056767252 | -4.13879728 |                                                                                            |
| AIA-Hot | Urine   | Nicotinic acid                    | 8.133289002 | 3.023838878 |                                                                                            |
| AIA-Hot | Urine   | 4-Methylcatechol                  | 9.910368025 | 3.308938633 |                                                                                            |
| AIA-Hot | Urine   | Benzyl Alcohol                    | 6.3729099   | 2.671952264 |                                                                                            |
| AIA-Hot | Urine   | 5,6-Dihydrouracil                 | 0.305430436 | -1.71108426 |                                                                                            |
| AIA-Hot | Urine   | Isoleucine                        | 3.916838119 | 1.969689504 |                                                                                            |
| AIA-Hot | Urine   | Glutarate                         | 4.446894019 | 2.152798022 |                                                                                            |
| AIA-Hot | Urine   | N,N-Dimethyl-1,4-Phenylenediamine | 2.257826228 | 1.174934455 |                                                                                            |
| AIA-Hot | Urine   | 5-Valerolactone                   | 4.237056135 | 2.083062243 |                                                                                            |
| AIA-Hot | Urine   | Nonanoate                         | 2.734816338 | 1.451443949 |                                                                                            |
| AIA-Hot | Urine   | L-Homocysteine Thiolactone        | 4.129844498 | 2.04608746  |                                                                                            |
| AIA-Hot | Urine   | 4-Hydroxybenzaldehyde             | 3.19516483  | 1.675890358 |                                                                                            |
| AIA-Hot | Urine   | Mono-Methyl Glutarate             | 0.20149746  | -2.31116644 |                                                                                            |
| AIA-Hot | Urine   | 3-Methyl-2-Oxindole               | 2.762815524 | 1.466139235 |                                                                                            |
| AIA-Hot | Urine   | Heptanoic Acid                    | 4.004637826 | 2.001671773 |                                                                                            |
| AIA-Hot | Urine   | Trans-Cinnamaldehyde              | 3.009911704 | 1.589721166 |                                                                                            |
| AIA-Hot | Urine   | Suberic Acid                      | 5.668115903 | 2.502869259 |                                                                                            |
| AIA-Hot | Urine   | 6-Carboxyhexanoate                | 0.173246851 | -2.52909896 |                                                                                            |
| AIA-Hot | Urine   | D-(+)-Glucosamine                 | 0.291727392 | -1.77730724 |                                                                                            |
| AIA-Hot | Urine   | N-Acetyl-L-Cysteine               | 16.18121242 | 4.016247805 |                                                                                            |
| AIA-Hot | Urine   | 4-Hydroxybenzaldehyde             | 9.813788521 | 3.294810183 |                                                                                            |
| AIA-Hot | Urine   | Meso-Tartaric Acid                | 2.138434115 | 1.096554758 |                                                                                            |
| AIA-Hot | Urine   | Pantolactone                      | 0.076860272 | -3.70161812 |                                                                                            |

|         |       |                                      |             |             |                   |
|---------|-------|--------------------------------------|-------------|-------------|-------------------|
| AIA-Hot | Urine | Indole-3-Acetic Acid                 | 2.042865901 | 1.030594505 |                   |
| AIA-Hot | Urine | Carnitine                            | 3.205074038 | 1.680357684 |                   |
| AIA-Hot | Urine | Phosphorylcholine                    | 2.427076115 | 1.279219353 |                   |
| AIA-Hot | Urine | Azelaic Acid                         | 0.277582461 | -1.84901168 |                   |
| AIA-Hot | Urine | 1-Hydroxy-2-Naphthoate               | 4.511253056 | 2.173528215 |                   |
| AIA-Hot | Urine | Glucuronic Acid                      | 0.480368567 | -1.05778634 |                   |
| AIA-Hot | Urine | Ascorbate                            | 0.48401382  | -1.04687985 |                   |
| AIA-Hot | Urine | D-Gulonic Acid Gama-Lactone          | 0.37980118  | -1.39668371 |                   |
| AIA-Hot | Urine | 1-Methyl-6,7-Dihydroxy-1,2,3,4-Tetra | 2.95857316  | 1.564901571 |                   |
| AIA-Hot | Urine | 2-Acetamido-2-Deoxy-Beta-D-Glucos    | 0.332403636 | -1.58899193 |                   |
| AIA-Hot | Urine | Indole-3-Acetaldehyde                | 2.087995174 | 1.062118377 |                   |
| AIA-Hot | Urine | Methyl Indole-3-Acetate              | 2.013632644 | 1.00980051  |                   |
| AIA-Hot | Urine | N-Acetyl-L-Phenylalanine             | 0.120533272 | -3.05249666 |                   |
| AIA-Hot | Urine | 3-Dehydroshikimate                   | 0.155273296 | -2.68711836 |                   |
| AIA-Hot | Urine | 3-Methoxytyrosine                    | 0.184629026 | -2.43729871 |                   |
| AIA-Hot | Urine | Gluconic Acid                        | 2.065657947 | 1.046601378 |                   |
| AIA-Hot | Urine | Indole-3-Acetamide                   | 0.160798996 | -2.63666969 |                   |
| AIA-Hot | Urine | D-Pantothenic Acid                   | 0.016419503 | -5.92844577 |                   |
| AIA-Hot | Urine | Acetylglucosamine                    | 2.338322402 | 1.225473859 |                   |
| AIA-Hot | Urine | Lipoamide                            | 5.346355192 | 2.418555688 |                   |
| AIA-Hot | Urine | S-Carboxymethyl-L-Cysteine           | 0.365937692 | -1.45033007 |                   |
| AIA-Hot | Urine | Nalpha-Acetyl-L-Lysine               | 2.18721332  | 1.129093934 |                   |
| AIA-Hot | Urine | Ferulate                             | 0.01262304  | -6.30779681 |                   |
| AIA-Hot | Urine | Sn-Glycero-3-Phosphocholine          | 0.262045838 | -1.9321089  |                   |
| AIA-Hot | Urine | 2'-Deoxyguanosine                    | 0.012572563 | -6.31357739 | Purine metabolism |
| AIA-Hot | Urine | Adenosine                            | 0.012572563 | -6.31357739 | Purine metabolism |
| AIA-Hot | Urine | Deoxyuridine                         | 2.523399475 | 1.335368615 |                   |
| AIA-Hot | Urine | 5'-Deoxyadenosine                    | 0.326125918 | -1.61649899 |                   |
| AIA-Hot | Urine | 10E-Heptadecenoic Acid               | 0.084533656 | -3.56433034 | Purine metabolism |
| AIA-Hot | Urine | Nandrolone                           | 2.954798741 | 1.563059868 |                   |
| AIA-Hot | Urine | Retinol                              | 2.367473237 | 1.243348117 |                   |
| AIA-Hot | Urine | Guanosine                            | 0.149516904 | -2.74161949 | Purine metabolism |
| AIA-Hot | Urine | N-Acetylneuraminate                  | 0.398791154 | -1.32629469 |                   |
| AIA-Hot | Urine | Inosine                              | 0.023228621 | -5.42795266 | Purine metabolism |
| AIA-Hot | Urine | 11Z-Eicosenoic Acid                  | 0.376802829 | -1.4081183  |                   |
| AIA-Hot | Urine | cAMP                                 | 0.300084028 | -1.73656156 |                   |
| AIA-Hot | Urine | Leukotriene B4                       | 0.154041837 | -2.69860586 |                   |
| AIA-Hot | Urine | 2'-Deoxyadenosine 5'-Diphosphate     | 0.29679473  | -1.75246262 | Purine metabolism |
| AIA-Hot | Urine | Geranylgeranyl Pyrophosphate         | 0.21744592  | -2.20127146 |                   |
| AIA-Hot | Urine | PE(O-18:0/0:0)                       | 4.995015709 | 2.320489215 |                   |
| AIA-Hot | Urine | Dihydrofolate                        | 0.212742014 | -2.23282312 |                   |
| AIA-Hot | Urine | Taurodeoxycholic Acid                | 3.700603069 | 1.887760399 |                   |
| AIA-Hot | Urine | LysoPC(18:0/0:0)                     | 4.756729071 | 2.249969856 |                   |
| AIA-Hot | Urine | Protoporphyrin                       | 0.060312046 | -4.05141002 |                   |
| AIA-Hot | Urine | Nicotinic Acid Adenine Dinucleotide  | 3.467244377 | 1.793789524 |                   |
| AIA-Hot | Urine | SM(d18:1/18:0)                       | 0.371428486 | -1.42884363 |                   |

**Table S5.4. Significantly differential metabolites of serum samples from AIA-Hot rats detected by LC/MS**

| Groups  | Samples | Description                           | AIA-Hot/Con | Log2FC      | Pathways                               |
|---------|---------|---------------------------------------|-------------|-------------|----------------------------------------|
| AIA-Hot | Serum   | S-(5'-Adenosyl)-L-Methionine          | 0.341507605 | -1.55001039 | Arginine and proline metabolism        |
| AIA-Hot | Serum   | Citrate                               | 0.091899588 | -3.44379779 | Citrate cycle (TCA cycle)              |
| AIA-Hot | Serum   | Glutamine                             | 0.036014934 | -4.79526094 | D-Glutamine and D-glutamate metabolism |
| AIA-Hot | Serum   | N-Acetyl-DL-Glutamic Acid             | 0.085949572 | -3.54036573 | D-Glutamine and D-glutamate metabolism |
| AIA-Hot | Serum   | Phenylacetaldehyde                    | 0.060179822 | -4.05457635 | Phenylalanine metabolism               |
| AIA-Hot | Serum   | 3-O-Sulfogalactosylceramide (d18:1/2) | 0.335489238 | -1.57566161 | Sphingolipid metabolism                |
| AIA-Hot | Serum   | Galactosylceramide (d18:1/16:0)       | 2.247247372 | 1.168158942 | Sphingolipid metabolism                |
| AIA-Hot | Serum   | Androsterone                          | 0.025904467 | -5.2706553  | Steroid hormone biosynthesis           |
| AIA-Hot | Serum   | Dehydroepiandrosterone                | 0.16542747  | -2.59572927 | Steroid hormone biosynthesis           |
| AIA-Hot | Serum   | Tetrahydrodeoxycorticosterone         | 0.450009036 | -1.15197413 | Steroid hormone biosynthesis           |
| AIA-Hot | Serum   | Pregnenolone                          | 0.051423386 | -4.28143158 | Steroid hormone biosynthesis           |
| AIA-Hot | Serum   | Tetrahydrodeoxycortisol               | 0.3733819   | -1.4212761  | Steroid hormone biosynthesis           |
| AIA-Hot | Serum   | 17-hydroxypregnenolone                | 0.009701071 | -6.68764028 | Steroid hormone biosynthesis           |
| AIA-Hot | Serum   | Dehydroepiandrosterone sulfate        | 0.028546136 | -5.13056069 | Steroid hormone biosynthesis           |
| AIA-Hot | Serum   | Cortisol                              | 68.74960866 | 6.103279596 | Steroid hormone biosynthesis           |
| AIA-Hot | Serum   | Menaquinone                           | 0.012833939 | -6.28389215 | Ubiquinone biosynthesis                |
| AIA-Hot | Serum   | Phylloquinone                         | 0.012826729 | -6.28470293 | Ubiquinone biosynthesis                |
| AIA-Hot | Serum   | 3-Methyl-2-Oxovaleric Acid            | 0.246900986 | -2.0179955  |                                        |
| AIA-Hot | Serum   | Hexanoate                             | 0.082109664 | -3.60630416 |                                        |
| AIA-Hot | Serum   | Proline                               | 0.355276248 | -1.49298686 |                                        |
| AIA-Hot | Serum   | S-Carboxymethyl-L-Cysteine            | 0.486953058 | -1.03814539 |                                        |
| AIA-Hot | Serum   | N,N-Dimethyl-1,4-Phenylenediamine     | 0.194795837 | -2.35996525 |                                        |
| AIA-Hot | Serum   | Pyridines-2,3-Dicarboxylate           | 0.1633833   | -2.61366756 |                                        |
| AIA-Hot | Serum   | L-Anserine                            | 6.718563555 | 2.748152814 |                                        |
| AIA-Hot | Serum   | Uridine                               | 0.334721973 | -1.57896483 |                                        |
| AIA-Hot | Serum   | Myristic Acid                         | 0.467558479 | -1.09678128 |                                        |
| AIA-Hot | Serum   | Quinate                               | 0.332870835 | -1.58696562 |                                        |
| AIA-Hot | Serum   | Caffeine                              | 0.202977456 | -2.30060859 |                                        |
| AIA-Hot | Serum   | O-Succinyl-L-Homoserine               | 0.009647507 | -6.6956281  |                                        |
| AIA-Hot | Serum   | 9Z-Hexadecenoic Acid                  | 0.039263951 | -4.67065085 |                                        |
| AIA-Hot | Serum   | 9E-Octadecenoic Acid                  | 0.079611808 | -3.65087377 |                                        |
| AIA-Hot | Serum   | Retinol                               | 0.031845181 | -4.97278112 |                                        |
| AIA-Hot | Serum   | Geranyl Pyrophosphate                 | 0.395528879 | -1.33814506 |                                        |
| AIA-Hot | Serum   | Rac-Glycerol 1-Myristate              | 0.061723765 | -4.01803013 |                                        |
| AIA-Hot | Serum   | MG (16:0/0:0/0:0)                     | 0.063881237 | -3.96846394 |                                        |
| AIA-Hot | Serum   | D-(+)-Cellobiose                      | 0.153716799 | -2.70165326 |                                        |
| AIA-Hot | Serum   | Amylose                               | 0.067385014 | -3.89142842 |                                        |
| AIA-Hot | Serum   | Farnesyl Diphosphate                  | 0.040490844 | -4.62626046 |                                        |
| AIA-Hot | Serum   | Desmosterol                           | 0.008078883 | -6.95162853 |                                        |
| AIA-Hot | Serum   | Beclomethasone                        | 0.24175769  | -2.04836631 |                                        |
| AIA-Hot | Serum   | 2-Arachidonoylglycerol                | 0.00212198  | -8.88037343 |                                        |
| AIA-Hot | Serum   | Cholic Acid                           | 0.223824238 | -2.15956182 |                                        |
| AIA-Hot | Serum   | LPE 16:1                              | 0.347283361 | -1.5258148  |                                        |
| AIA-Hot | Serum   | LPC 18:0                              | 0.289924559 | -1.78625055 |                                        |
| AIA-Hot | Serum   | Taurocholic Acid                      | 0.164253952 | -2.60600001 |                                        |
| AIA-Hot | Serum   | Protoporphyrin                        | 0.247168729 | -2.01643186 |                                        |
| AIA-Hot | Serum   | Uridine 5'-Diphosphoglucuronic Acid   | 0.036345867 | -4.78206488 |                                        |
| AIA-Hot | Serum   | PS 28:2                               | 0.001490531 | -9.3899578  |                                        |
| AIA-Hot | Serum   | SM(d18:1/16:0)                        | 0.321068041 | -1.63904903 |                                        |
| AIA-Hot | Serum   | PCe 34:1                              | 0.120705248 | -3.0504397  |                                        |
| AIA-Hot | Serum   | PEp 36:1                              | 0.45073195  | -1.14965838 |                                        |
| AIA-Hot | Serum   | PC 34:2                               | 0.305172607 | -1.71230263 |                                        |
| AIA-Hot | Serum   | PE 38:6-A                             | 0.364154395 | -1.45737784 |                                        |
| AIA-Hot | Serum   | SM(d18:1/18:0)                        | 0.34730691  | -1.52571698 |                                        |
| AIA-Hot | Serum   | PC 36:1                               | 0.244286036 | -2.0333567  |                                        |
| AIA-Hot | Serum   | PCe 36:4                              | 0.306954399 | -1.70390375 |                                        |
| AIA-Hot | Serum   | PC 38:0 (19:0/19:0)                   | 4.880924848 | 2.287154538 |                                        |
| AIA-Hot | Serum   | FAD                                   | 0.417088056 | -1.2615761  |                                        |
| AIA-Hot | Serum   | C22DH Sphingomyelin                   | 0.186360537 | -2.42383171 |                                        |
| AIA-Hot | Serum   | PCe 36:3                              | 2.831834888 | 1.50173715  |                                        |
| AIA-Hot | Serum   | PC 38:7                               | 0.358681796 | -1.47922357 |                                        |
| AIA-Hot | Serum   | PG 38:3                               | 0.41592409  | -1.26560785 |                                        |
| AIA-Hot | Serum   | PC 40:6                               | 0.386014985 | -1.37327124 |                                        |
